# Supplementary material for: Political leadership has limited impact on fossil fuel taxes and subsidies
Source: PubMed Central journal article supplement — Proc Natl Acad Sci U S A. 2022 Nov 14;119(47):e2208024119. doi: 10.1073/pnas.2208024119 (PMC9704748; doi:10.1073/pnas.2208024119), 2022-11-14
Supplement: pnas.2208024119.sapp.pdf [file pnas.2208024119.sapp.pdf]

2 **Supplementary Information for**  
3 **Political Leadership Has Limited Impact on Fossil Fuel Taxes and Subsidies**

4 **Cesar B. Martinez Alvarez, Chad Hazlett, Paasha Mahdavi, Michael Ross**

5 **Michael L. Ross**  
6 **E-mail: [mlrosspolisci.ucla.edu](mailto:mlrosspolisci.ucla.edu)**

7 **This PDF file includes:**

- 8 Figs. S1 to S8 (not allowed for Brief Reports)
- 9 Tables S1 to S10 (not allowed for Brief Reports)
- 10 SI References

|    |                                                                           |           |
|----|---------------------------------------------------------------------------|-----------|
| 11 | <b>Contents</b>                                                           |           |
| 12 | <b>1 Kernel Density Plots by Subgroup</b>                                 | <b>3</b>  |
| 13 | <b>2 Fossil Fuel Subsidies Reforms Survival Plots</b>                     | <b>9</b>  |
| 14 | <b>3 Distribution of Government Tenures with Crises</b>                   | <b>10</b> |
| 15 | <b>4 Additional Tables</b>                                                | <b>11</b> |
| 16 | <b>5 Supplementary Data Description</b>                                   | <b>20</b> |
| 17 | A Fuel Tax Data Collection Methods . . . . .                              | 20        |
| 18 | A.1 Selection Dates and Grades . . . . .                                  | 20        |
| 19 | A.2 Converting to Local Currency . . . . .                                | 20        |
| 20 | A.3 Benchmark Prices . . . . .                                            | 20        |
| 21 | A.4 Consumption Weighting . . . . .                                       | 20        |
| 22 | B List of countries and monthly observations of fuel taxes data . . . . . | 21        |
| 23 | C Leadership data . . . . .                                               | 24        |
| 24 | C.1 Sample of Leaders . . . . .                                           | 24        |
| 25 | C.2 Leaders with the Largest Increases per Month . . . . .                | 44        |
| 26 | C.3 Leaders with the Largest Decreases per Month . . . . .                | 44        |
| 27 | D Data Sources . . . . .                                                  | 45        |

28 1. Kernel Density Plots by Subgroup

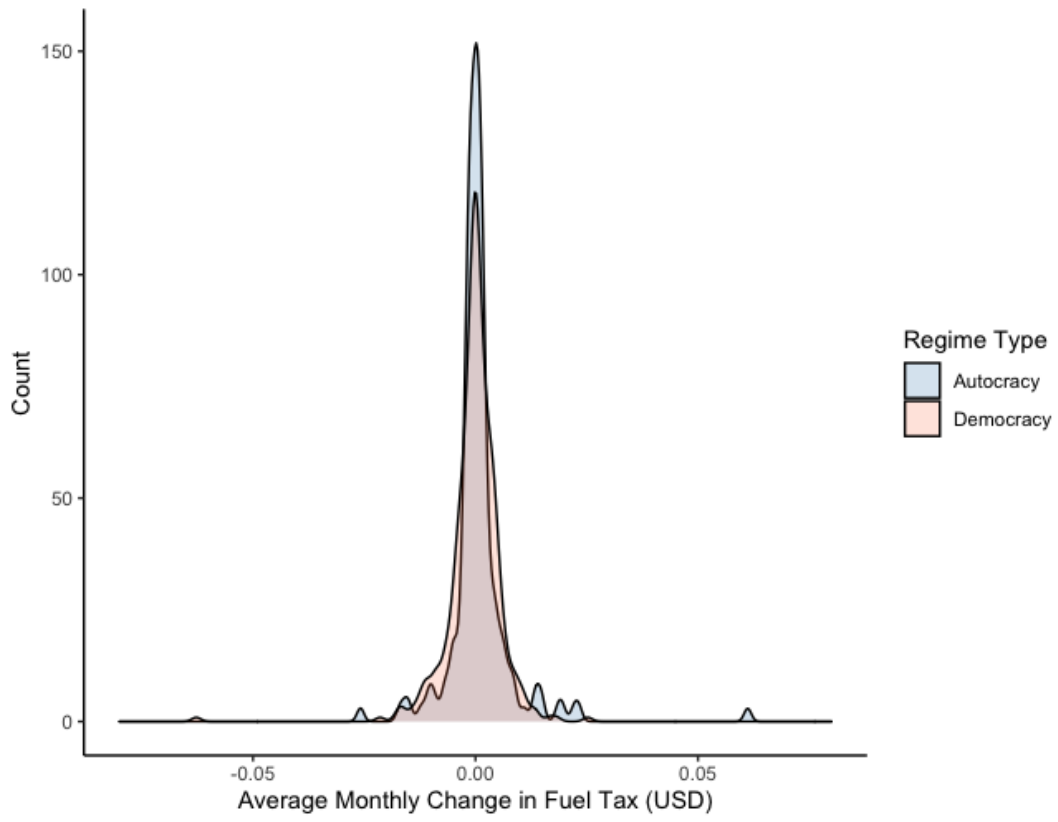

Fig. S1. Mean monthly change in net implicit taxes for leaders in democracies versus autocracies.

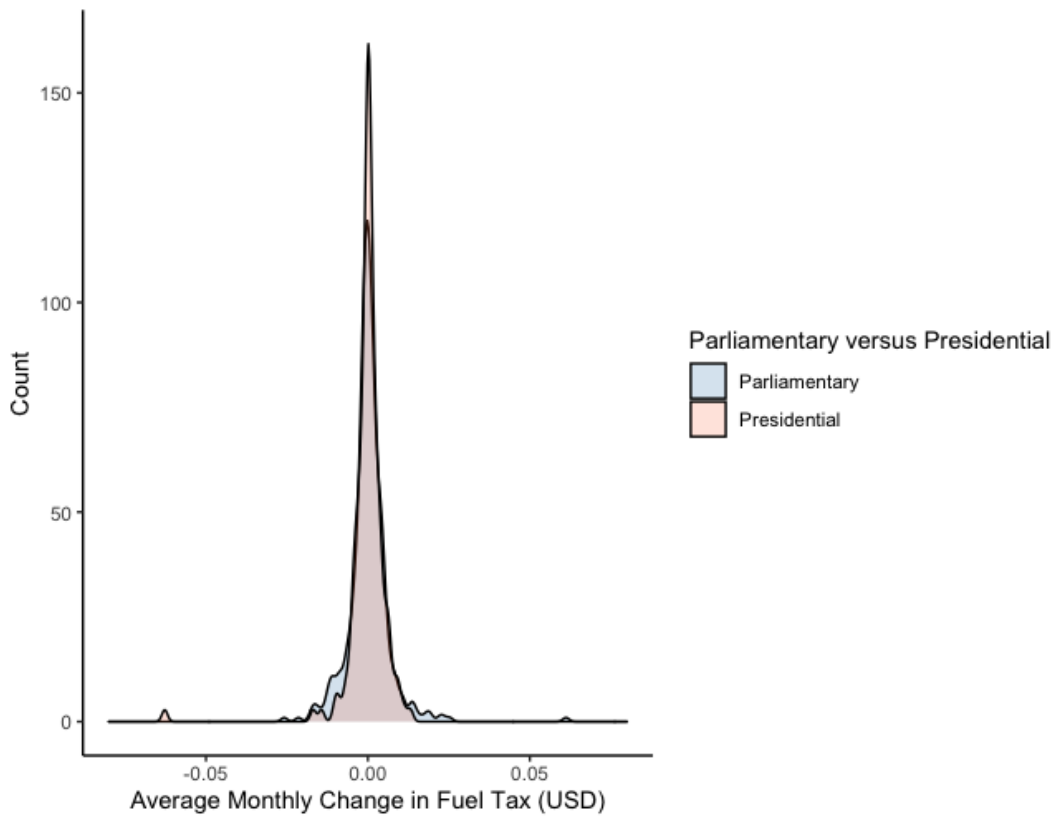

Fig. S2. Mean monthly change in net implicit taxes for leaders in presidential democracies versus in parliamentary democracies.

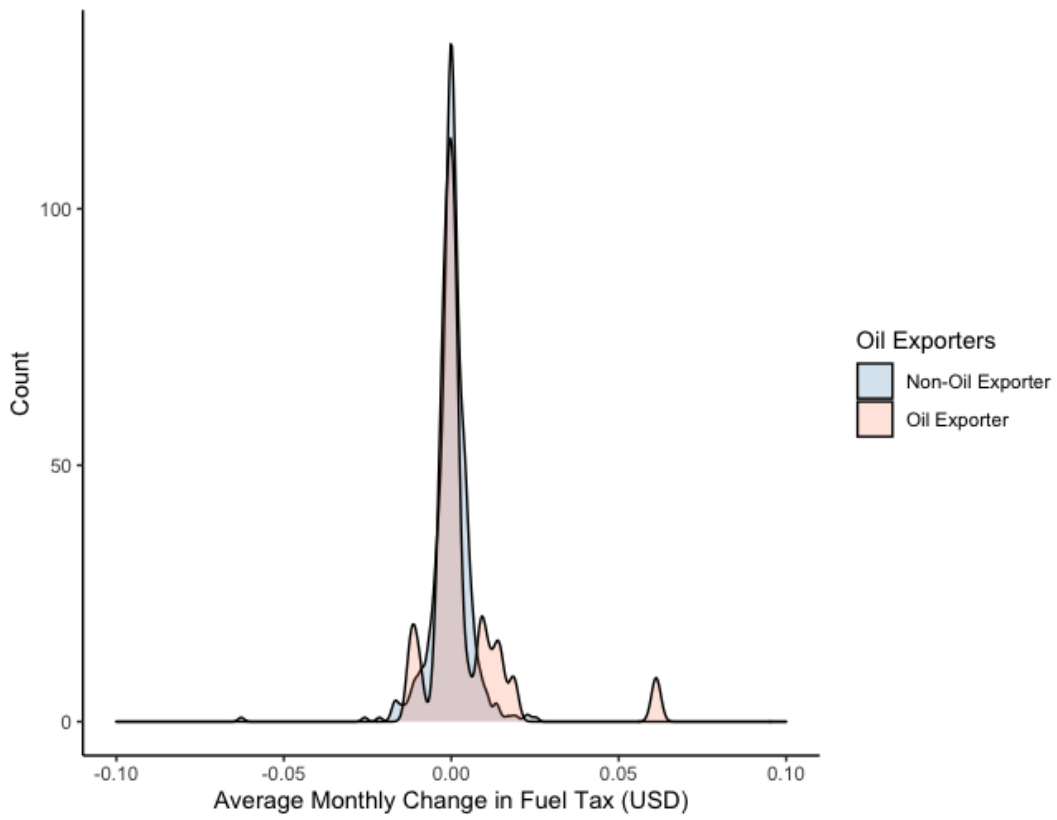

Fig. S3. Mean monthly change in net implicit taxes for leaders in oil exporters versus in oil importers.

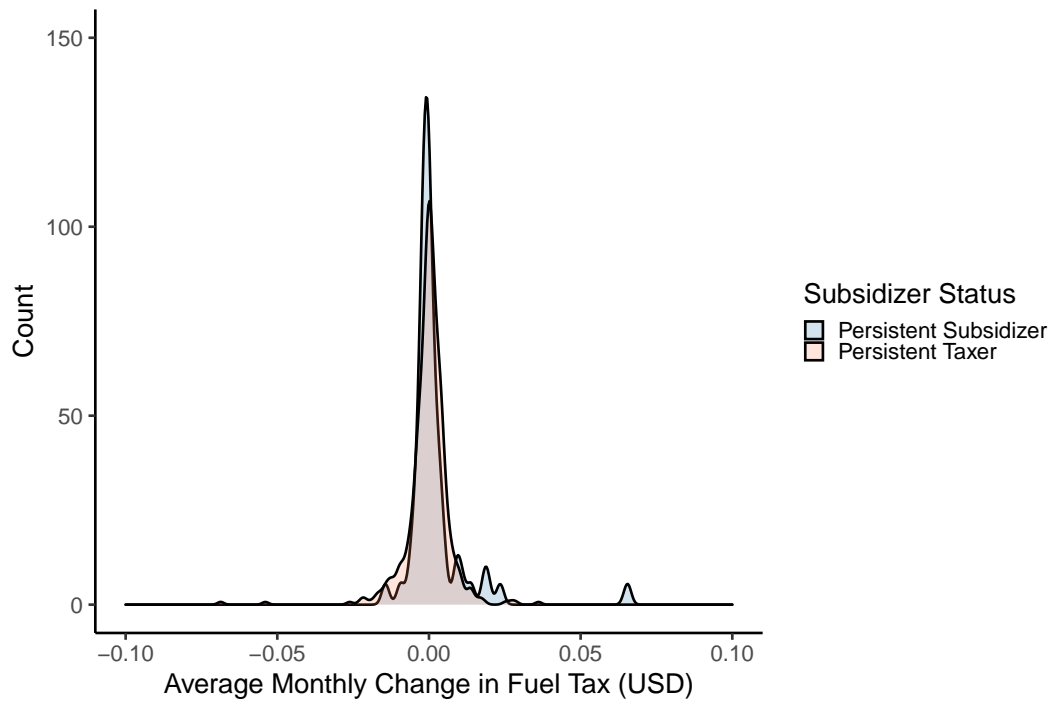

**Fig. S4.** Mean monthly change in net implicit taxes for leaders in persistent-subsidizing countries versus in persistent-taxing countries.

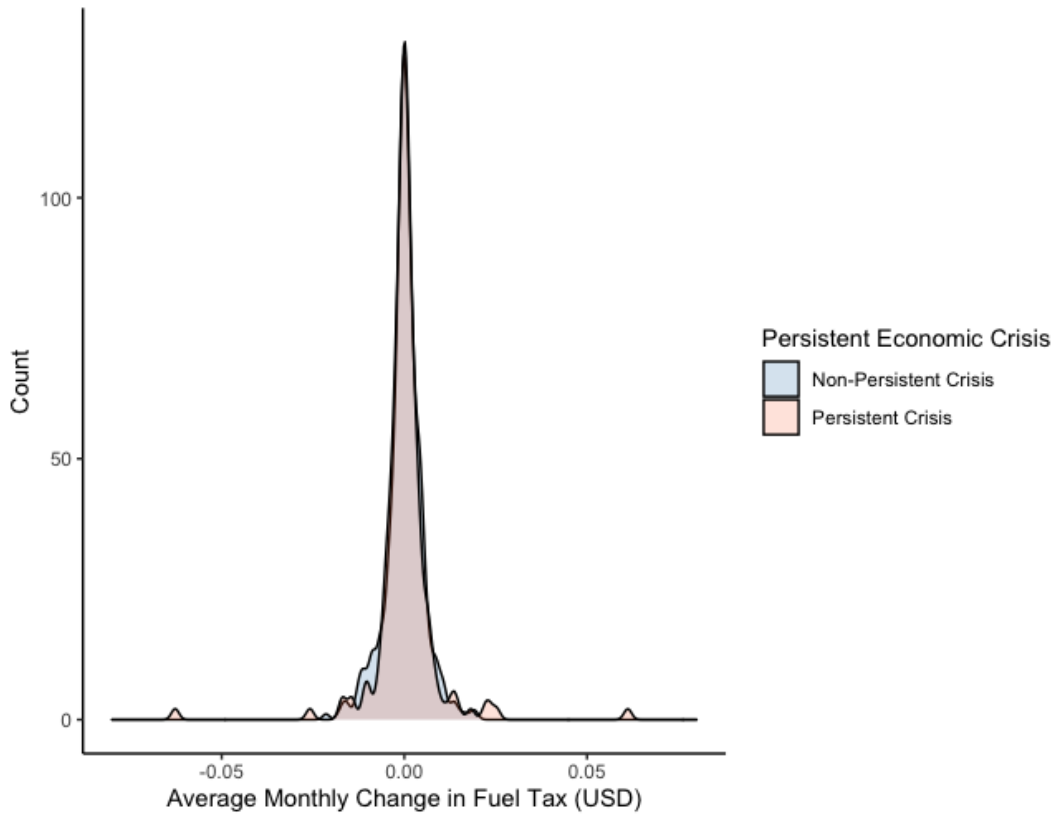

**Fig. S5.** Mean monthly change in net implicit taxes for leaders experiencing economic crises for more than 50% of their tenures ('persistent crisis') versus those experiencing crises for less than or equal to 50% of their tenures ('non-persistent crisis'). Distributions look similar when we change the threshold from 50% to either 75% or 85%. Results from a variance ratio test indicate statistically significantly higher variances in change in net taxes/subsidies for leaders experiencing crises, with ratios of 0.30 ( $p < 0.0001$ ), 0.37 ( $p < 0.0001$ ), 0.44 ( $p < 0.0001$ ), respectively, for the crisis thresholds of 50%, 75% and 85%.

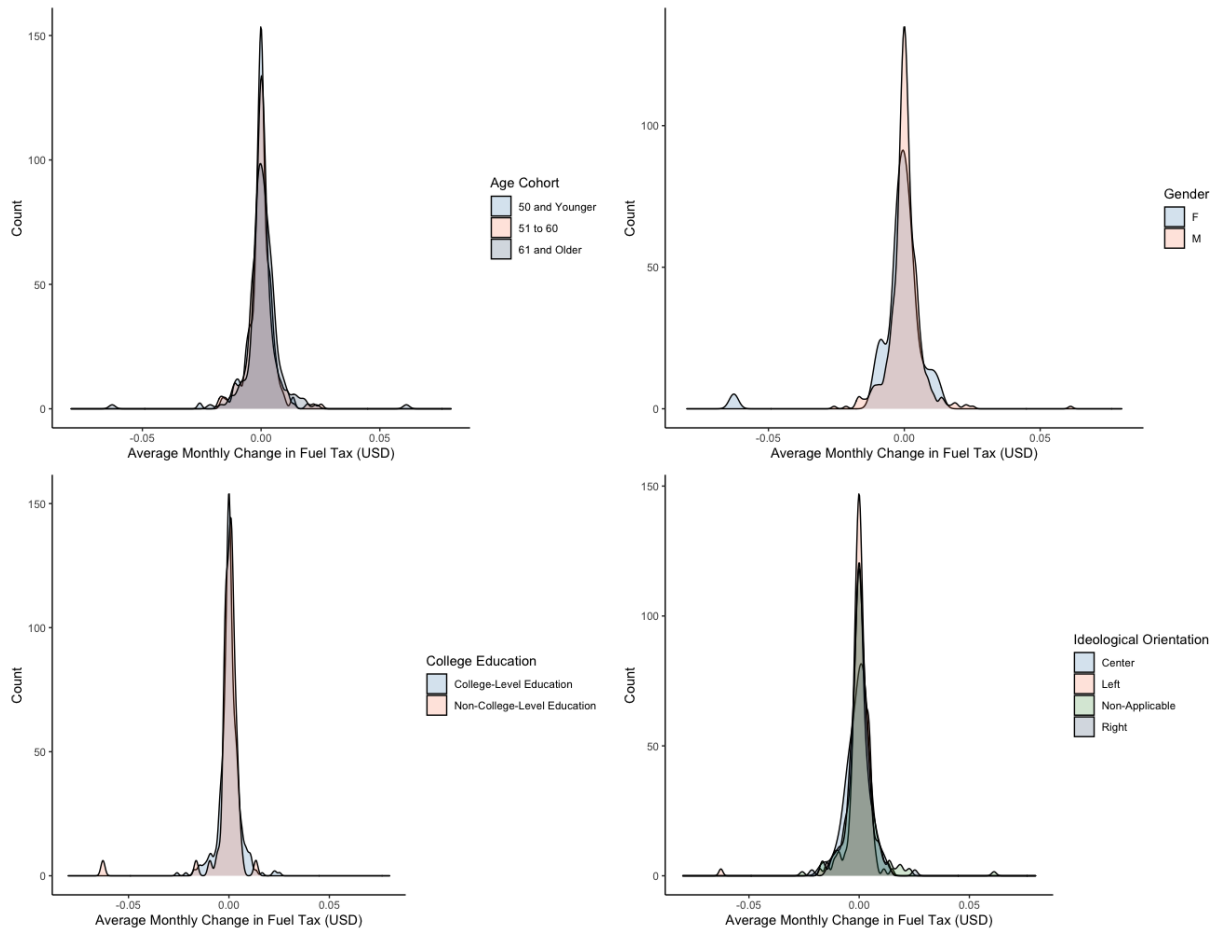

**Fig. S6.** Mean monthly change in net implicit taxes for leaders. Distributions are disaggregated by leader age (top left), gender (top right), education (bottom left), and ideology (bottom right).



29 **2. Fossil Fuel Subsidies Reforms Survival Plots**

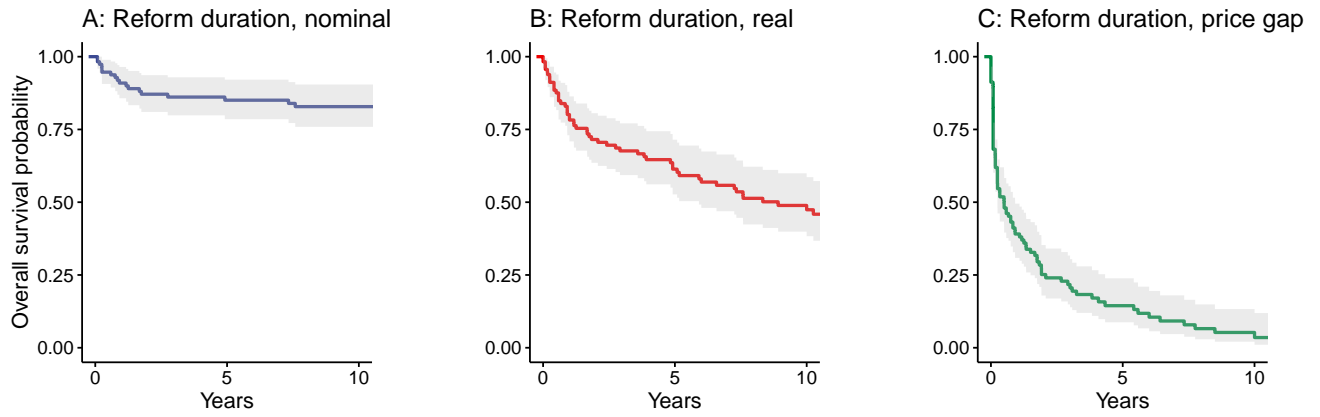

**Fig. S7.** Reform duration in persistent subsidizers. Kaplan-Meier survival plot for the duration of large reforms, defined as any month-to-month change in the nominal price of gasoline that exceeds 10%.

### 3. Distribution of Government Tenures with Crises

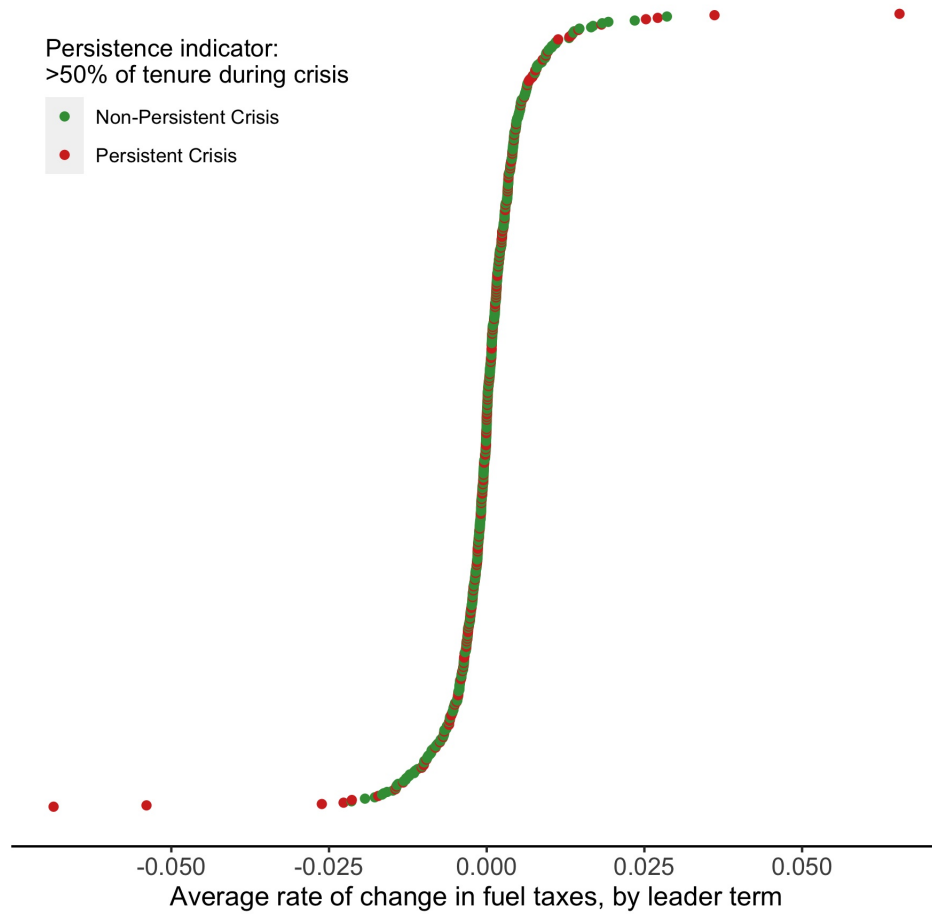

**Fig. S8.** Distribution of leader average changes in fuel taxes, highlighting leaders facing an economic crisis for more than half of their tenure. Each point refers to a leader's rate of change in taxes, defined as the total change in fuel taxes from tenure start to end divided by the number of months in office ( $\Delta$  USD/liter/month). Points are sorted from largest positive change (top) to largest negative change (bottom). For leaders with multiple tenures, suffixes are added based on term: e.g., Michelle Bachelet I refers to the Chilean president's 2006-2010 term and Michelle Bachelet II refers to the 2014-2018 term.

|                              | Model 1             | Model 2              | Model 3             | Model 4              |
|------------------------------|---------------------|----------------------|---------------------|----------------------|
| (Intercept)                  | -2.3972<br>(5.5592) | -0.5130<br>(6.8474)  | 0.6665<br>(7.6988)  | -0.4185<br>(6.8407)  |
| GDP Per Capita               | 0.6390<br>(1.1832)  | 0.3419<br>(1.4794)   | 0.1121<br>(1.6320)  | 0.3195<br>(1.4774)   |
| GDP Per Capita Sq.           | -0.0304<br>(0.0636) | -0.0221<br>(0.0810)  | -0.0091<br>(0.0873) | -0.0207<br>(0.0809)  |
| GDP Growth                   | -0.0001<br>(0.0011) | -0.0033*<br>(0.0014) | -0.0030<br>(0.0016) | -0.0032*<br>(0.0014) |
| Central Government Debt      | -0.0005<br>(0.0007) | -0.0007<br>(0.0009)  | -0.0011<br>(0.0009) | -0.0007<br>(0.0009)  |
| FF Income Dependence         | -0.0012<br>(0.0039) | -0.0053<br>(0.0031)  | -0.0054<br>(0.0032) | -0.0053<br>(0.0031)  |
| Value-Added Tax Rate         | 0.0040<br>(0.0058)  | 0.0089<br>(0.0078)   | 0.0042<br>(0.0076)  | 0.0089<br>(0.0078)   |
| Leader's Age                 |                     |                      | 0.0010<br>(0.0013)  |                      |
| Leader's Gender (M)          |                     |                      | 0.0131<br>(0.0601)  |                      |
| Leader's Schooling           |                     |                      | -0.0518<br>(0.0418) |                      |
| Executive Political Ideology |                     |                      | -0.0196<br>(0.0128) |                      |
| Economic Crisis Year         |                     |                      |                     | 0.0058<br>(0.0168)   |
| R <sup>2</sup>               | 0.9559              | 0.8946               | 0.8985              | 0.8946               |
| Adj. R <sup>2</sup>          | 0.9536              | 0.8935               | 0.8973              | 0.8935               |
| Country Intercepts           | N                   | Y                    | Y                   | Y                    |
| Country Trends               | N                   | Y                    | Y                   | Y                    |
| Leader Intercepts            | Y                   | N                    | N                   | N                    |
| Leader Trends                | Y                   | N                    | N                   | N                    |
| Num. obs.                    | 18083               | 18083                | 15953               | 18083                |
| RMSE                         | 0.0957              | 0.1450               | 0.1430              | 0.1450               |
| N Clusters                   | 91                  | 91                   | 87                  | 91                   |

\*\*\*  $p < 0.001$ ; \*\*  $p < 0.01$ ; \*  $p < 0.05$

**Table S1. Model results for democracies. The outcome is the net implicit tax on gasoline. The sample includes all democratic countries with more than one political leader throughout the period of analysis. Coefficient estimates indicate the expected change in net implicit taxes for one-unit changes in each covariate. Column 1 includes leader intercepts, leader trends, and country-level covariates. Column 2 includes country intercepts, country trends, and country-level covariates. Column 3 includes country intercepts, country trends, country-level covariates, and leader-specific covariates. Column 4 adds a binary variable to measure economic crisis.**

|                              | Model 1             | Model 2             | Model 3             | Model 4             |
|------------------------------|---------------------|---------------------|---------------------|---------------------|
| (Intercept)                  | -9.9631<br>(4.5897) | 1.2501<br>(4.0274)  | 0.9629<br>(6.2303)  | 1.3784<br>(3.9860)  |
| GDP Per Capita               | 2.2740*<br>(1.0261) | -0.2610<br>(0.8946) | -0.1656<br>(1.2896) | -0.2895<br>(0.8850) |
| GDP Per Capita Sq.           | -0.1176<br>(0.0535) | 0.0140<br>(0.0473)  | 0.0112<br>(0.0668)  | 0.0154<br>(0.0467)  |
| GDP Growth                   | -0.0005<br>(0.0014) | -0.0009<br>(0.0013) | -0.0038<br>(0.0025) | -0.0009<br>(0.0013) |
| Central Government Debt      | -0.0002<br>(0.0005) | -0.0007<br>(0.0008) | -0.0014<br>(0.0016) | -0.0007<br>(0.0008) |
| FF Income Dependence         | -0.0081<br>(0.0038) | -0.0086<br>(0.0038) | -0.0086<br>(0.0045) | -0.0087<br>(0.0037) |
| Value-Added Tax Rate         | -0.0063<br>(0.0063) | 0.0052<br>(0.0101)  | -0.0049<br>(0.0056) | 0.0055<br>(0.0106)  |
| Leader's Age                 |                     |                     | 0.0032*<br>(0.0014) |                     |
| Leader's Gender (M)          |                     |                     | -0.0234<br>(0.0894) |                     |
| Leader's Schooling           |                     |                     | -0.0707<br>(0.0437) |                     |
| Executive Political Ideology |                     |                     | -0.0251<br>(0.0358) |                     |
| Economic Crisis Year         |                     |                     |                     | -0.0065<br>(0.0305) |
| R <sup>2</sup>               | 0.9231              | 0.8897              | 0.8943              | 0.8897              |
| Adj. R <sup>2</sup>          | 0.9201              | 0.8881              | 0.8925              | 0.8881              |
| Country Intercepts           | N                   | Y                   | Y                   | Y                   |
| Country Trends               | N                   | Y                   | Y                   | Y                   |
| Leader Intercepts            | Y                   | N                   | N                   | N                   |
| Leader Trends                | Y                   | N                   | N                   | N                   |
| Num. obs.                    | 8088                | 8088                | 6707                | 8088                |
| RMSE                         | 0.1330              | 0.1574              | 0.1519              | 0.1573              |
| N Clusters                   | 56                  | 56                  | 53                  | 56                  |

\*\*\*  $p < 0.001$ ; \*\*  $p < 0.01$ ; \*  $p < 0.05$

**Table S2. Model results for non-democratic countries. The outcome is the net implicit tax on gasoline. The sample includes all non-democratic countries with more than one political leader throughout the period of analysis. Coefficient estimates indicate the expected change in net implicit taxes for one-unit changes in each covariate. Column 1 includes leader intercepts, leader trends, and country-level covariates. Column 2 includes country intercepts, country trends, and country-level covariates. Column 3 includes country intercepts, country trends, country-level covariates, and leader-specific covariates. Column 4 adds a binary variable to measure economic crisis.**

|                              | Model 1             | Model 2              | Model 3              | Model 4              |
|------------------------------|---------------------|----------------------|----------------------|----------------------|
| (Intercept)                  | 5.4578<br>(18.4418) | 18.2226<br>(14.8035) | 20.0944<br>(17.4226) | 18.2560<br>(14.8398) |
| GDP Per Capita               | -1.0283<br>(3.7255) | -3.6645<br>(2.9984)  | -3.9588<br>(3.5500)  | -3.6734<br>(3.0051)  |
| GDP Per Capita Sq.           | 0.0545<br>(0.1861)  | 0.1913<br>(0.1526)   | 0.2024<br>(0.1807)   | 0.1920<br>(0.1529)   |
| GDP Growth                   | 0.0003<br>(0.0019)  | -0.0015<br>(0.0023)  | -0.0006<br>(0.0022)  | -0.0012<br>(0.0023)  |
| Central Government Debt      | -0.0002<br>(0.0019) | 0.0042*<br>(0.0018)  | 0.0039<br>(0.0022)   | 0.0042*<br>(0.0018)  |
| FF Income Dependence         | -0.0018<br>(0.0074) | -0.0015<br>(0.0022)  | -0.0017<br>(0.0020)  | -0.0016<br>(0.0022)  |
| Value-Added Tax Rate         | 0.0172<br>(0.0135)  | -0.0029<br>(0.0129)  | -0.0072<br>(0.0129)  | -0.0029<br>(0.0128)  |
| Leader's Age                 |                     |                      | 0.0004<br>(0.0029)   |                      |
| Leader's Gender (M)          |                     |                      | 0.0334<br>(0.0804)   |                      |
| Leader's Schooling           |                     |                      | -0.0155<br>(0.0606)  |                      |
| Executive Political Ideology |                     |                      | -0.0076<br>(0.0202)  |                      |
| Economic Crisis Year         |                     |                      |                      | 0.0147<br>(0.0321)   |
| R <sup>2</sup>               | 0.9487              | 0.8739               | 0.8780               | 0.8739               |
| Adj. R <sup>2</sup>          | 0.9457              | 0.8726               | 0.8767               | 0.8727               |
| Country Intercepts           | N                   | Y                    | Y                    | Y                    |
| Country Trends               | N                   | Y                    | Y                    | Y                    |
| Leader Intercepts            | Y                   | N                    | N                    | N                    |
| Leader Trends                | Y                   | N                    | N                    | N                    |
| Num. obs.                    | 9441                | 9441                 | 8289                 | 9441                 |
| RMSE                         | 0.1002              | 0.1534               | 0.1545               | 0.1534               |
| N Clusters                   | 44                  | 44                   | 42                   | 44                   |

\*\*\*  $p < 0.001$ ; \*\*  $p < 0.01$ ; \*  $p < 0.05$

**Table S3. Model results for parliamentary democracies. The outcome is the net implicit tax on gasoline. The sample includes all parliamentary democracies with more than one political leader throughout the period of analysis. Coefficient estimates indicate the expected change in net implicit taxes for one-unit changes in each covariate. Column 1 includes leader intercepts, leader trends, and country-level covariates. Column 2 includes country intercepts, country trends, and country-level covariates. Column 3 includes country intercepts, country trends, country-level covariates, and leader-specific covariates. Column 4 adds a binary variable to measure economic crisis.**

|                              | Model 1             | Model 2               | Model 3               | Model 4               |
|------------------------------|---------------------|-----------------------|-----------------------|-----------------------|
| (Intercept)                  | -7.2594<br>(4.2876) | -1.7754<br>(5.8180)   | -3.5719<br>(6.4086)   | -1.7426<br>(5.8585)   |
| GDP Per Capita               | 1.7066<br>(0.9759)  | 0.4464<br>(1.2844)    | 0.7442<br>(1.3894)    | 0.4385<br>(1.2876)    |
| GDP Per Capita Sq.           | -0.0893<br>(0.0560) | -0.0179<br>(0.0722)   | -0.0274<br>(0.0761)   | -0.0174<br>(0.0721)   |
| GDP Growth                   | -0.0002<br>(0.0014) | -0.0043*<br>(0.0020)  | -0.0043*<br>(0.0019)  | -0.0043*<br>(0.0020)  |
| Central Government Debt      | -0.0006<br>(0.0010) | -0.0032**<br>(0.0008) | -0.0029**<br>(0.0008) | -0.0032**<br>(0.0008) |
| FF Income Dependence         | -0.0008<br>(0.0115) | -0.0092<br>(0.0150)   | -0.0078<br>(0.0190)   | -0.0092<br>(0.0150)   |
| Value-Added Tax Rate         | -0.0014<br>(0.0048) | 0.0122<br>(0.0075)    | 0.0090<br>(0.0070)    | 0.0122<br>(0.0074)    |
| Leader's Age                 |                     |                       | 0.0012<br>(0.0010)    |                       |
| Leader's Gender (M)          |                     |                       | -0.0532<br>(0.0696)   |                       |
| Leader's Schooling           |                     |                       | -0.0670<br>(0.0454)   |                       |
| Executive Political Ideology |                     |                       | -0.0252*<br>(0.0112)  |                       |
| Economic Crisis Year         |                     |                       |                       | 0.0011<br>(0.0189)    |
| R <sup>2</sup>               | 0.9365              | 0.8779                | 0.8859                | 0.8779                |
| Adj. R <sup>2</sup>          | 0.9335              | 0.8762                | 0.8842                | 0.8762                |
| Country Intercepts           | N                   | Y                     | Y                     | Y                     |
| Country Trends               | N                   | Y                     | Y                     | Y                     |
| Leader Intercepts            | Y                   | N                     | N                     | N                     |
| Leader Trends                | Y                   | N                     | N                     | N                     |
| Num. obs.                    | 7415                | 7415                  | 6779                  | 7415                  |
| RMSE                         | 0.0921              | 0.1257                | 0.1205                | 0.1257                |
| N Clusters                   | 47                  | 47                    | 46                    | 47                    |

\*\*\*  $p < 0.001$ ; \*\*  $p < 0.01$ ; \*  $p < 0.05$

**Table S4. Model results for presidential democracies. The outcome is the net implicit tax on gasoline. The sample includes all presidential democracies with more than one political leader throughout the period of analysis. Coefficient estimates indicate the expected change in net implicit taxes for one-unit changes in each covariate. Column 1 includes leader intercepts, leader trends, and country-level covariates. Column 2 includes country intercepts, country trends, and country-level covariates. Column 3 includes country intercepts, country trends, country-level covariates, and leader-specific covariates. Column 4 adds a binary variable to measure economic crisis.**

|                              | Model 1             | Model 2              | Model 3               | Model 4              |
|------------------------------|---------------------|----------------------|-----------------------|----------------------|
| (Intercept)                  | -3.0655<br>(3.6009) | -0.2522<br>(4.0393)  | 2.3964<br>(4.4233)    | -0.2490<br>(4.0365)  |
| GDP Per Capita               | 0.7234<br>(0.8197)  | 0.1149<br>(0.9676)   | -0.2508<br>(0.9666)   | 0.1139<br>(0.9664)   |
| GDP Per Capita Sq.           | -0.0373<br>(0.0440) | -0.0076<br>(0.0566)  | 0.0110<br>(0.0539)    | -0.0076<br>(0.0565)  |
| GDP Growth                   | -0.0000<br>(0.0010) | -0.0021<br>(0.0012)  | -0.0029*<br>(0.0014)  | -0.0021<br>(0.0012)  |
| Central Government Debt      | -0.0009<br>(0.0006) | -0.0011<br>(0.0006)  | -0.0016*<br>(0.0007)  | -0.0011<br>(0.0006)  |
| FF Income Dependence         | -0.0096<br>(0.0074) | -0.0265*<br>(0.0115) | -0.0321**<br>(0.0108) | -0.0265*<br>(0.0115) |
| Value-Added Tax Rate         | 0.0039<br>(0.0047)  | 0.0054<br>(0.0065)   | 0.0014<br>(0.0061)    | 0.0054<br>(0.0065)   |
| Leader's Age                 |                     |                      | 0.0010<br>(0.0012)    |                      |
| Leader's Gender (M)          |                     |                      | 0.0366<br>(0.0513)    |                      |
| Leader's Schooling           |                     |                      | -0.0678<br>(0.0347)   |                      |
| Executive Political Ideology |                     |                      | -0.0199<br>(0.0113)   |                      |
| Economic Crisis Year         |                     |                      |                       | 0.0006<br>(0.0150)   |
| R <sup>2</sup>               | 0.9395              | 0.8779               | 0.8845                | 0.8779               |
| Adj. R <sup>2</sup>          | 0.9366              | 0.8767               | 0.8831                | 0.8767               |
| Country Intercepts           | N                   | Y                    | Y                     | Y                    |
| Country Trends               | N                   | Y                    | Y                     | Y                    |
| Leader Intercepts            | Y                   | N                    | N                     | N                    |
| Leader Trends                | Y                   | N                    | N                     | N                    |
| Num. obs.                    | 23050               | 23050                | 19972                 | 23050                |
| RMSE                         | 0.1091              | 0.1522               | 0.1477                | 0.1522               |
| N Clusters                   | 115                 | 115                  | 109                   | 115                  |

\*\*\* $p < 0.001$ ; \*\* $p < 0.01$ ; \* $p < 0.05$

**Table S5. Model results for oil importers. The outcome is the net implicit tax on gasoline. The sample includes all oil-importing countries with more than one political leader throughout the period of analysis. Coefficient estimates indicate the expected change in net implicit taxes for one-unit changes in each covariate. Column 1 includes leader intercepts, leader trends, and country-level covariates. Column 2 includes country intercepts, country trends, and country-level covariates. Column 3 includes country intercepts, country trends, country-level covariates, and leader-specific covariates. Column 4 adds a binary variable to measure economic crisis.**

|                              | Model 1              | Model 2              | Model 3              | Model 4              |
|------------------------------|----------------------|----------------------|----------------------|----------------------|
| (Intercept)                  | -13.3067<br>(8.0255) | -6.1858<br>(8.8328)  | -11.8090<br>(8.0896) | -4.8267<br>(8.4604)  |
| GDP Per Capita               | 2.5636<br>(1.6852)   | 1.2117<br>(1.7763)   | 2.3271<br>(1.6142)   | 0.9222<br>(1.6965)   |
| GDP Per Capita Sq.           | -0.1222<br>(0.0884)  | -0.0593<br>(0.0882)  | -0.1086<br>(0.0811)  | -0.0444<br>(0.0844)  |
| GDP Growth                   | -0.0021<br>(0.0015)  | -0.0008<br>(0.0013)  | -0.0034<br>(0.0017)  | -0.0009<br>(0.0014)  |
| Central Government Debt      | 0.0010<br>(0.0010)   | 0.0006<br>(0.0012)   | 0.0009<br>(0.0021)   | 0.0006<br>(0.0012)   |
| FF Income Dependence         | -0.0079*<br>(0.0029) | -0.0068*<br>(0.0024) | -0.0064<br>(0.0030)  | -0.0069*<br>(0.0025) |
| Value-Added Tax Rate         | 0.0165<br>(0.0107)   | 0.0226<br>(0.0422)   | 0.0294<br>(0.0494)   | 0.0226<br>(0.0420)   |
| Leader's Age                 |                      |                      | 0.0007<br>(0.0032)   |                      |
| Leader's Gender              |                      |                      | -0.1214<br>(0.2065)  |                      |
| Leader's Schooling           |                      |                      | -0.0692<br>(0.0883)  |                      |
| Executive Political Ideology |                      |                      | 0.0002<br>(0.0486)   |                      |
| Economic Crisis Year         |                      |                      |                      | -0.0853<br>(0.0411)  |
| R <sup>2</sup>               | 0.9695               | 0.9485               | 0.9498               | 0.9498               |
| Adj. R <sup>2</sup>          | 0.9683               | 0.9477               | 0.9489               | 0.9491               |
| Country Intercepts           | N                    | Y                    | Y                    | Y                    |
| Country Trends               | N                    | Y                    | Y                    | Y                    |
| Leader Intercepts            | Y                    | N                    | N                    | N                    |
| Leader Trends                | Y                    | N                    | N                    | N                    |
| Num. obs.                    | 3121                 | 3121                 | 2688                 | 3121                 |
| RMSE                         | 0.1087               | 0.1394               | 0.1392               | 0.1377               |
| N Clusters                   | 21                   | 21                   | 18                   | 21                   |

\*\*\*  $p < 0.001$ ; \*\*  $p < 0.01$ ; \*  $p < 0.05$

**Table S6. Model results for oil exporters. The outcome is the net implicit tax on gasoline. The sample includes all oil-exporting countries with more than one political leader throughout the period of analysis. Coefficient estimates indicate the expected change in net implicit taxes for one-unit changes in each covariate. Column 1 includes leader intercepts, leader trends, and country-level covariates. Column 2 includes country intercepts, country trends, and country-level covariates. Column 3 includes country intercepts, country trends, country-level covariates, and leader-specific covariates. Column 4 adds a binary variable to measure economic crisis.**



|                              | Model 1                | Model 2               | Model 3               | Model 4                |
|------------------------------|------------------------|-----------------------|-----------------------|------------------------|
| (Intercept)                  | -18.2846<br>(11.3450)  | 7.2037<br>(14.7434)   | 6.9924<br>(16.3555)   | 8.1705<br>(14.4887)    |
| GDP Per Capita               | 3.6732<br>(2.2861)     | -1.2896<br>(2.8455)   | -1.2590<br>(3.1180)   | -1.4739<br>(2.7997)    |
| GDP Per Capita Sq.           | -0.1815<br>(0.1141)    | 0.0600<br>(0.1383)    | 0.0563<br>(0.1498)    | 0.0688<br>(0.1363)     |
| GDP Growth                   | -0.0006<br>(0.0007)    | 0.0005<br>(0.0007)    | -0.0007<br>(0.0028)   | 0.0005<br>(0.0008)     |
| Central Government Debt      | 0.0003<br>(0.0014)     | -0.0010<br>(0.0017)   | -0.0006<br>(0.0033)   | -0.0010<br>(0.0017)    |
| FF Income Dependence         | -0.0144***<br>(0.0024) | -0.0184**<br>(0.0038) | -0.0182**<br>(0.0044) | -0.0186***<br>(0.0036) |
| Value-Added Tax Rate         | 0.0059<br>(0.0131)     | 0.0286<br>(0.0181)    | 0.0200<br>(0.0295)    | 0.0276<br>(0.0171)     |
| Leader's Age                 |                        |                       | 0.0029<br>(0.0017)    |                        |
| Leader's Gender (M)          |                        |                       | 0.1281<br>(0.1214)    |                        |
| Leader's Schooling           |                        |                       | -0.1755<br>(0.1015)   |                        |
| Executive Political Ideology |                        |                       | -0.0465<br>(0.0206)   |                        |
| Economic Crisis Year         |                        |                       |                       | -0.0235<br>(0.0553)    |
| R <sup>2</sup>               | 0.8500                 | 0.7105                | 0.7439                | 0.7112                 |
| Adj. R <sup>2</sup>          | 0.8448                 | 0.7077                | 0.7408                | 0.7082                 |
| Country Intercepts           | N                      | Y                     | Y                     | Y                      |
| Country Trends               | N                      | Y                     | Y                     | Y                      |
| Leader Intercepts            | Y                      | N                     | N                     | N                      |
| Leader Trends                | Y                      | N                     | N                     | N                      |
| Num. obs.                    | 3193                   | 3193                  | 2603                  | 3193                   |
| RMSE                         | 0.1130                 | 0.1551                | 0.1370                | 0.1549                 |
| N Clusters                   | 13                     | 13                    | 11                    | 13                     |

\*\*\*  $p < 0.001$ ; \*\*  $p < 0.01$ ; \*  $p < 0.05$

**Table S7. Model results for persistent gasoline subsidizers. The outcome is the net implicit tax on gasoline. The sample includes all persistent subsidizers with more than one political leader throughout the period of analysis. Coefficient estimates indicate the expected change in net implicit taxes for one-unit changes in each covariate. Column 1 includes leader intercepts, leader trends, and country-level covariates. Column 2 includes country intercepts, country trends, and country-level covariates. Column 3 includes country intercepts, country trends, country-level covariates, and leader-specific covariates. Column 4 adds a binary variable to measure economic crisis.**

|                              | Model 1               | Model 2               | Model 3               | Model 4              |
|------------------------------|-----------------------|-----------------------|-----------------------|----------------------|
| (Intercept)                  | -21.8643<br>(14.8720) | -11.3711<br>(10.1266) | -14.7488<br>(11.2351) | -11.9187<br>(9.3330) |
| GDP Per Capita               | 4.9350<br>(3.1910)    | 2.4413<br>(2.2416)    | 3.1234<br>(2.4786)    | 2.5113<br>(2.0602)   |
| GDP Per Capita Sq.           | -0.2600<br>(0.1647)   | -0.1230<br>(0.1275)   | -0.1616<br>(0.1434)   | -0.1223<br>(0.1175)  |
| GDP Growth                   | -0.0049<br>(0.0038)   | -0.0079<br>(0.0043)   | -0.0085<br>(0.0044)   | -0.0091<br>(0.0044)  |
| Central Government Debt      | -0.0015<br>(0.0010)   | -0.0040<br>(0.0019)   | -0.0039<br>(0.0020)   | -0.0040<br>(0.0018)  |
| FF Income Dependence         | -0.0091<br>(0.0056)   | -0.0060<br>(0.0048)   | -0.0085<br>(0.0041)   | -0.0069<br>(0.0051)  |
| Value-Added Tax Rate         | -0.0109<br>(0.0238)   | 0.0135<br>(0.0218)    | 0.0052<br>(0.0308)    | 0.0142<br>(0.0226)   |
| Leader's Age                 |                       |                       | 0.0048<br>(0.0015)    |                      |
| Leader's Gender (M)          |                       |                       | 0.1323<br>(0.0467)    |                      |
| Leader's Schooling           |                       |                       | 0.0752<br>(0.0187)    |                      |
| Executive Political Ideology |                       |                       | -0.0619<br>(0.0196)   |                      |
| Economic Crisis Year         |                       |                       |                       | -0.0773<br>(0.0360)  |
| R <sup>2</sup>               | 0.7123                | 0.6742                | 0.6713                | 0.6797               |
| Adj. R <sup>2</sup>          | 0.7036                | 0.6680                | 0.6649                | 0.6734               |
| Country Intercepts           | N                     | Y                     | Y                     | Y                    |
| Country Trends               | N                     | Y                     | Y                     | Y                    |
| Leader Intercepts            | Y                     | N                     | N                     | N                    |
| Leader Trends                | Y                     | N                     | N                     | N                    |
| Num. obs.                    | 1878                  | 1878                  | 1728                  | 1878                 |
| RMSE                         | 0.1646                | 0.1742                | 0.1751                | 0.1728               |
| N Clusters                   | 15                    | 15                    | 12                    | 15                   |

\*\*\*  $p < 0.001$ ; \*\*  $p < 0.01$ ; \*  $p < 0.05$

**Table S8. Model results for persistent gasoline taxers. The outcome is the net implicit tax on gasoline. The sample includes all persistent taxers with more than one political leader throughout the period of analysis. Coefficient estimates indicate the expected change in net implicit taxes for one-unit changes in each covariate. Column 1 includes leader intercepts, leader trends, and country-level covariates. Column 2 includes country intercepts, country trends, and country-level covariates. Column 3 includes country intercepts, country trends, country-level covariates, and leader-specific covariates. Column 4 adds a binary variable to measure economic crisis.**

|                         | Model 1              | Model 2             | Model 3             | Model 4             |
|-------------------------|----------------------|---------------------|---------------------|---------------------|
| (Intercept)             | 0.0010<br>(0.0005)   | 0.0006<br>(0.0006)  | 0.0009<br>(0.0012)  | -0.0002<br>(0.0003) |
| Democracy               | -0.0014*<br>(0.0007) |                     |                     |                     |
| Parliamentary Democracy |                      | -0.0009<br>(0.0008) |                     |                     |
| Presidential Democracy  |                      | -0.0008<br>(0.0008) |                     |                     |
| Oil Importer            |                      |                     | -0.0010<br>(0.0012) |                     |
| Persistent Subsidizer   |                      |                     |                     | 0.0022<br>(0.0013)  |
| R <sup>2</sup>          | 0.0065               | 0.0028              | 0.0018              | 0.0077              |
| Num. obs.               | 591                  | 591                 | 591                 | 591                 |
| RMSE                    | 0.0076               | 0.0077              | 0.0077              | 0.0076              |
| N Clusters              | 155                  | 155                 | 155                 | 155                 |

\*\*\*  $p < 0.001$ ; \*\*  $p < 0.01$ ; \*  $p < 0.05$

**Table S9. Comparison of rate of change in the net tax across subgroups. The outcome is the mean monthly rate of change in the net implicit tax on gasoline for each leader. For each column, the independent variable is a categorical variable that separates countries into the different groups for analysis: democracies, autocracies, parliamentary democracies, presidential democracies, oil exporters, oil importers, persistent subsidizers, and persistent taxers. Standard errors are clustered at the country level.**

## 32 5. Supplementary Data Description

### 33 A. Fuel Tax Data Collection Methods.

34 **A.1. Selection Dates and Grades.** For countries with data reported more frequently than monthly intervals (daily, weekly or  
35 bi-weekly), we used the price from the first day or week of the month as the monthly price. When data on multiple gasoline  
36 grades were available we use regular-graded gasoline (typically between 87 and 90 octane) to reflect the type most likely to be  
37 purchased by the average consumer. In countries where the availability of grades changes over time we selected the grade with  
38 the longest coverage. When data were available for different parts of a country we selected the region that includes the capital  
39 city.

40 **A.2. Converting to Local Currency.** To convert local currencies to US dollars we use monthly exchange rates from the IMF  
41 International Financial Statistics. For converting from nominal to real 2015 US dollars we use monthly inflation rates from  
42 the US Federal Reserve Economic Database (FRED) Consumer Price Index for All Urban Consumers: All Items Less Food  
43 and Energy (CPILFESL) series. In countries that experienced currency changes or revaluations—for example, Romania (July  
44 2005), Turkey (January 2005), Ghana (August 2007)—all prices have been back-converted to the more recent currency price.  
45 For example, the Turkish lira was revalued in January 2005 by dividing by 1,000,000 to usher in the ‘Second Turkish lira’. All  
46 pre-2005 prices are thus divided by 1,000,000 to be in Second Turkish lira per litre.

47 **A.3. Benchmark Prices.** To estimate net fuel taxes and subsidies we compute the gap between the local price and the international  
48 benchmark price, less a small adjustment to account for distribution costs. To simplify our analysis we assume local distribution  
49 costs are fixed for all countries and years at 10 US cents per litre in constant 2015 US dollars; this estimate is drawn from ref.  
50 19, which uses a similar figure for the cost of bringing refined gasoline to retailers. Though distribution and other local costs  
51 may vary by location, we expect those unobserved differences to change slowly, and thus may affect cross-country comparisons  
52 but not within-country comparisons over time.

53 For our benchmark we use the spot price for conventional refined gasoline at the New York Harbor as reported by the US  
54 Energy Information Administration. For oil-importing countries, the benchmark price represents the marginal cost of supplying  
55 gasoline to consumers. For oil-producing countries, who in many cases can supply gasoline to their citizens at a lower cost, the  
56 difference between the retail price and the benchmark represents the opportunity cost to the government: if it sets a retail  
57 price below the international benchmark, it is forgoing revenue it would otherwise accrue by selling its gasoline at a market  
58 price. In both cases we treat the difference between the retail price and the benchmark as the net tax or subsidy.

**A.4. Consumption Weighting.** We weight net gasoline taxes and subsidies by consumption using data on annual motor gasoline  
consumption from the US Energy Information Agency International Energy Statistics. A weight  $w_{it}$  is given by a country’s  
consumption share, calculated as the total consumption by each country  $i$  divided by total global consumption in month  $t$   
(assuming constant consumption share across all 12 months in a given year). A global consumption-weighted mean net tax is  
then given by

$$tax_t = \left( \sum_{i=1}^N w_{it} price_{it} \right) - benchmark_t$$

59 at each month  $t$ . The most recent Energy Information Administration data on motor gasoline consumption are from 2012; we  
60 extrapolate consumption shares up to 2015 by assuming that shares (but not consumption) remain fixed across the 2012–2015  
61 period.

62 B. List of countries and monthly observations of fuel taxes data.

Table S10. List of countries and monthly observations used in the analysis.

|    | Country | Monthly Obs. | Start Date | End Date |
|----|---------|--------------|------------|----------|
| 1  | AFG     | 130          | 2004-03    | 2015-10  |
| 2  | AGO     | 189          | 2000-01    | 2015-09  |
| 3  | ALB     | 80           | 2008-07    | 2015-07  |
| 4  | ARE     | 311          | 1990-01    | 2015-11  |
| 5  | ARG     | 262          | 1994-01    | 2015-11  |
| 6  | ARM     | 162          | 2001-01    | 2015-03  |
| 7  | AUS     | 218          | 1990-03    | 2015-09  |
| 8  | AUT     | 249          | 1995-01    | 2015-09  |
| 9  | AZE     | 252          | 1994-03    | 2015-08  |
| 10 | BDI     | 240          | 1994-12    | 2015-09  |
| 11 | BEL     | 261          | 1994-01    | 2015-09  |
| 12 | BEN     | 178          | 2000-01    | 2015-10  |
| 13 | BFA     | 211          | 1998-02    | 2015-09  |
| 14 | BGD     | 295          | 1990-04    | 2015-10  |
| 15 | BGR     | 238          | 1995-02    | 2015-07  |
| 16 | BHR     | 311          | 1990-01    | 2015-11  |
| 17 | BIH     | 161          | 2002-01    | 2015-07  |
| 18 | BLR     | 111          | 2006-09    | 2015-11  |
| 19 | BLZ     | 182          | 2000-01    | 2015-02  |
| 20 | BOL     | 309          | 1990-01    | 2015-09  |
| 21 | BRA     | 304          | 1990-04    | 2015-08  |
| 22 | BWA     | 211          | 1998-04    | 2015-10  |
| 23 | CAF     | 229          | 1995-02    | 2015-10  |
| 24 | CAN     | 305          | 1990-01    | 2015-10  |
| 25 | CHE     | 275          | 1993-01    | 2015-11  |
| 26 | CHL     | 305          | 1990-04    | 2015-08  |
| 27 | CHN     | 310          | 1990-01    | 2015-10  |
| 28 | CIV     | 146          | 2001-01    | 2015-08  |
| 29 | CMR     | 270          | 1991-11    | 2015-10  |
| 30 | COD     | 205          | 1996-12    | 2015-10  |
| 31 | COG     | 172          | 2001-01    | 2015-10  |
| 32 | COL     | 199          | 1999-01    | 2015-07  |
| 33 | CRI     | 260          | 1994-02    | 2015-09  |
| 34 | CYP     | 137          | 2004-05    | 2015-09  |
| 35 | CZE     | 189          | 2000-01    | 2015-09  |
| 36 | DEU     | 261          | 1994-01    | 2015-09  |
| 37 | DNK     | 261          | 1994-01    | 2015-09  |
| 38 | DOM     | 167          | 2001-01    | 2015-09  |
| 39 | DZA     | 227          | 1996-08    | 2015-06  |
| 40 | ECU     | 310          | 1990-01    | 2015-10  |
| 41 | EGY     | 305          | 1990-05    | 2015-09  |
| 42 | ESP     | 261          | 1994-01    | 2015-09  |
| 43 | EST     | 189          | 2000-01    | 2015-09  |
| 44 | ETH     | 158          | 2000-07    | 2013-08  |
| 45 | FIN     | 249          | 1995-01    | 2015-09  |
| 46 | FRA     | 261          | 1994-01    | 2015-09  |
| 47 | GAB     | 175          | 2000-12    | 2015-10  |
| 48 | GBR     | 261          | 1994-01    | 2015-09  |
| 49 | GEO     | 85           | 2008-07    | 2015-07  |
| 50 | GHA     | 290          | 1990-01    | 2014-03  |
| 51 | GIN     | 124          | 2005-01    | 2015-04  |
| 52 | GMB     | 154          | 2002-01    | 2015-04  |
| 53 | GNB     | 118          | 1999-12    | 2015-04  |
| 54 | GNQ     | 262          | 1994-01    | 2015-10  |

|     | Country | Monthly Obs. | Start Date | End Date |
|-----|---------|--------------|------------|----------|
| 55  | GRC     | 258          | 1994-01    | 2015-09  |
| 56  | GTM     | 307          | 1990-01    | 2015-08  |
| 57  | GUY     | 287          | 1991-10    | 2015-08  |
| 58  | HND     | 165          | 2000-01    | 2013-09  |
| 59  | HRV     | 185          | 2000-03    | 2015-07  |
| 60  | HTI     | 195          | 1998-10    | 2014-12  |
| 61  | HUN     | 281          | 1992-01    | 2015-09  |
| 62  | IDN     | 310          | 1990-01    | 2015-10  |
| 63  | IND     | 258          | 1994-04    | 2015-10  |
| 64  | IRL     | 270          | 1991-10    | 2015-09  |
| 65  | IRN     | 311          | 1990-01    | 2015-11  |
| 66  | IRQ     | 307          | 1990-01    | 2015-11  |
| 67  | ISR     | 308          | 1990-01    | 2015-08  |
| 68  | ITA     | 261          | 1994-01    | 2015-09  |
| 69  | JAM     | 134          | 2004-02    | 2015-09  |
| 70  | JOR     | 312          | 1990-01    | 2015-12  |
| 71  | JPN     | 301          | 1990-08    | 2015-10  |
| 72  | KAZ     | 73           | 2009-07    | 2015-07  |
| 73  | KEN     | 210          | 1997-10    | 2015-03  |
| 74  | KGZ     | 152          | 2003-01    | 2015-08  |
| 75  | KHM     | 242          | 1994-07    | 2015-03  |
| 76  | KOR     | 310          | 1990-01    | 2015-10  |
| 77  | KWT     | 303          | 1990-01    | 2015-11  |
| 78  | LAO     | 172          | 2000-09    | 2014-12  |
| 79  | LBN     | 167          | 2002-01    | 2015-11  |
| 80  | LBR     | 71           | 2008-07    | 2014-12  |
| 81  | LBY     | 236          | 1996-01    | 2015-09  |
| 82  | LKA     | 308          | 1990-03    | 2015-10  |
| 83  | LSO     | 140          | 2004-01    | 2015-10  |
| 84  | LTU     | 186          | 2000-01    | 2015-09  |
| 85  | LUX     | 261          | 1994-01    | 2015-09  |
| 86  | LVA     | 180          | 2000-01    | 2014-12  |
| 87  | MAR     | 238          | 1996-01    | 2015-10  |
| 88  | MDA     | 194          | 1999-01    | 2015-02  |
| 89  | MDG     | 248          | 1994-10    | 2015-10  |
| 90  | MEX     | 157          | 2002-07    | 2015-07  |
| 91  | MKD     | 105          | 2006-04    | 2014-12  |
| 92  | MLI     | 170          | 2001-07    | 2015-10  |
| 93  | MLT     | 136          | 2004-06    | 2015-09  |
| 94  | MMR     | 28           | 2012-04    | 2014-07  |
| 95  | MNG     | 238          | 1995-12    | 2015-09  |
| 96  | MOZ     | 151          | 2003-02    | 2015-08  |
| 97  | MRT     | 201          | 1997-03    | 2015-06  |
| 98  | MUS     | 284          | 1992-01    | 2015-08  |
| 99  | MWI     | 232          | 1995-07    | 2015-08  |
| 100 | MYS     | 298          | 1991-01    | 2015-10  |
| 101 | NAM     | 305          | 1990-03    | 2015-11  |
| 102 | NER     | 170          | 2001-08    | 2015-09  |
| 103 | NGA     | 300          | 1990-01    | 2015-03  |
| 104 | NIC     | 297          | 1990-08    | 2015-08  |
| 105 | NLD     | 261          | 1994-01    | 2015-09  |
| 106 | NOR     | 306          | 1990-01    | 2015-07  |
| 107 | NPL     | 234          | 1996-05    | 2015-10  |
| 108 | NZL     | 309          | 1990-01    | 2015-10  |
| 109 | OMN     | 312          | 1990-01    | 2015-12  |
| 110 | PAK     | 113          | 2006-05    | 2015-11  |
| 111 | PAN     | 209          | 1998-01    | 2015-08  |
| 112 | PER     | 271          | 1993-01    | 2015-07  |

|     | Country | Monthly Obs. | Start Date | End Date |
|-----|---------|--------------|------------|----------|
| 113 | PHL     | 310          | 1990-01    | 2015-10  |
| 114 | PNG     | 113          | 2006-01    | 2015-07  |
| 115 | POL     | 132          | 2004-05    | 2015-08  |
| 116 | PRT     | 261          | 1994-01    | 2015-09  |
| 117 | PRY     | 309          | 1990-01    | 2015-09  |
| 118 | QAT     | 311          | 1990-01    | 2015-11  |
| 119 | ROM     | 201          | 1998-01    | 2014-12  |
| 120 | RUS     | 223          | 1997-01    | 2015-07  |
| 121 | RWA     | 184          | 2000-01    | 2015-04  |
| 122 | SAU     | 311          | 1990-01    | 2015-11  |
| 123 | SDN     | 214          | 1997-03    | 2014-12  |
| 124 | SEN     | 304          | 1990-01    | 2015-10  |
| 125 | SGP     | 190          | 2000-01    | 2015-10  |
| 126 | SLE     | 204          | 1993-10    | 2015-02  |
| 127 | SLV     | 141          | 2004-01    | 2015-09  |
| 128 | SRB     | 110          | 2006-06    | 2015-07  |
| 129 | SUR     | 310          | 1990-01    | 2015-10  |
| 130 | SVK     | 136          | 2004-06    | 2015-09  |
| 131 | SVN     | 189          | 2000-01    | 2015-09  |
| 132 | SWE     | 249          | 1995-01    | 2015-09  |
| 133 | SWZ     | 190          | 2000-01    | 2015-10  |
| 134 | SYR     | 164          | 2002-01    | 2015-08  |
| 135 | TCD     | 154          | 2003-01    | 2015-10  |
| 136 | TGO     | 209          | 1998-01    | 2015-08  |
| 137 | THA     | 283          | 1991-08    | 2015-10  |
| 138 | TJK     | 164          | 2002-02    | 2015-09  |
| 139 | TLS     | 159          | 2002-05    | 2015-09  |
| 140 | TTO     | 308          | 1990-01    | 2015-08  |
| 141 | TUN     | 209          | 1990-01    | 2015-07  |
| 142 | TUR     | 252          | 1994-01    | 2015-07  |
| 143 | TWN     | 286          | 1992-01    | 2015-10  |
| 144 | TZA     | 155          | 2002-01    | 2015-03  |
| 145 | UGA     | 177          | 2000-01    | 2015-06  |
| 146 | UKR     | 145          | 2003-03    | 2015-07  |
| 147 | URY     | 306          | 1990-04    | 2015-09  |
| 148 | USA     | 302          | 1990-08    | 2015-10  |
| 149 | UZB     | 87           | 2008-10    | 2015-12  |
| 150 | VEN     | 311          | 1990-01    | 2015-11  |
| 151 | VNM     | 247          | 1995-03    | 2015-09  |
| 152 | YEM     | 213          | 1998-01    | 2015-09  |
| 153 | ZAF     | 311          | 1990-01    | 2015-11  |
| 154 | ZMB     | 175          | 2001-01    | 2015-10  |
| 155 | ZWE     | 79           | 2009-02    | 2015-09  |

## 64 C. Leadership data.

65 **C.1. Sample of Leaders.** We processed a data sample of 936 government tenures corresponding to 838 presidents, prime ministers,  
66 and monarchs for the period 1990 to 2015 from the Archigos dataset (*sample 1*). Then, for the construction of the dataset, we  
67 removed observations under two conditions: they either do not have gasoline pricing data or they lack leader information. Most  
68 of the observations falling in the second category correspond to times of regime change in countries in transition, for example  
69 Armenia, Azerbaijan, Bosnia and Herzegovina, Belarus, Czechia, Slovakia, Estonia, Kazakhstan, Kyrgyzstan, Lithuania, Latvia,  
70 Moldova, North Macedonia, Montenegro, Tajikistan, Serbia, Croatia, and Serbia (the successor states of the Soviet Union and  
71 Yugoslavia), as well as the early months for Namibia and Timor-Leste, which gained independence recently. There are three  
72 countries for which Archigos does not have leadership information for 2015: Guatemala, Romania, and Haiti.

73 We then include only country-leader-month units with data on the dependent and independent variables (*sample 2*). For  
74 the statistical analysis, we further subset the data to include only leaders whose tenure lasted for more than 6 months and  
75 restrict it to countries with more than one leader; this results in 31,446 observations for 603 unique leaders in 653 tenures  
76 (*sample 3*). Whereas most of the leaders had only one tenure, some were in office more than once. These include, for example,  
77 Girija Prasad Koirala (Prime Minister of Nepal) and Eddie Fenech Adami (Premier of Malta).

78 To calculate the total change in the fuel tax from the beginning to the end of each tenure, we did the following. First, we  
79 divided all leaders with more than 12 months in office into two categories: (1) leaders with some gasoline pricing data at  
80 both the beginning and end of their tenures (at least one month of net implicit tax in the quarter after entry and before exit,  
81 including those still in office by the end of the period of analysis) and (2) leaders whose starting date happens before January  
82 1990 or for whom we don't have gasoline pricing data for the quarter of exit.

83 For the first group, we calculated the average gasoline price and net implicit tax for the last quarter of tenure and subtracted  
84 from it the average price and net implicit tax corresponding to the first quarter in office. For the second group, we filtered to  
85 only the country-leader-month observations with gasoline data and use these to calculate an "effective" change from the first  
86 three monthly observations to the last three available, including non-consecutive months.

87 The following tables present the original tenures, including the name of the leader (from the *Archigos* dataset), country, first  
88 month of tenure, last month of tenure, length of the spell in our dataset, the total change in the tax from the beginning to the  
89 end of the period and the rate of change, which is the total change divided by the number of tenure months.



| Leader ID                 | Country | From       | To         | Spell Length | Change Tax | Rate Change | Cens  |
|---------------------------|---------|------------|------------|--------------|------------|-------------|-------|
| Najibullah-AFG            | AFG     | 1986-05-04 | 1992-04-16 | 28           | NA         | NA          | Left  |
| Mojadidi-AFG              | AFG     | 1992-04-28 | 1992-06-28 | 2            | NA         | NA          | NA    |
| Burhanuddin Rabbani-AFG   | AFG     | 1992-06-28 | 1996-09-27 | 51           | NA         | NA          | NA    |
| Mullah Omar-AFG           | AFG     | 1996-09-27 | 2001-11-13 | 62           | NA         | NA          | NA    |
| Hamid Karzai-AFG          | AFG     | 2001-12-22 | 2014-09-29 | 154          | 0.3316     | 0.0022      | NA    |
| Ahmadzai-AFG              | AFG     | 2014-09-29 | 2015-12-31 | 15           | -0.1849    | -0.0123     | Right |
| Dos Santos-AGO            | AGO     | 1979-09-10 | 2015-12-31 | 312          | -0.1527    | -5E-04      | Both  |
| Alia-ALB                  | ALB     | 1985-04-13 | 1992-04-03 | 28           | NA         | NA          | Left  |
| Berisha-ALB               | ALB     | 1992-04-09 | 1997-07-24 | 63           | NA         | NA          | NA    |
| Fatos Nano-ALB            | ALB     | 1997-07-24 | 1998-10-02 | 15           | NA         | NA          | NA    |
| Majko-ALB                 | ALB     | 1998-10-02 | 1999-10-29 | 12           | NA         | NA          | NA    |
| Meta-ALB                  | ALB     | 1999-10-29 | 2002-02-22 | 28           | NA         | NA          | NA    |
| Majko-ALB                 | ALB     | 2002-02-22 | 2002-07-31 | 5            | NA         | NA          | NA    |
| Fatos Nano-ALB            | ALB     | 2002-07-31 | 2005-09-11 | 38           | NA         | NA          | NA    |
| Berisha-ALB               | ALB     | 2005-09-11 | 2013-09-15 | 96           | -0.2491    | -0.0026     | NA    |
| Rama-ALB                  | ALB     | 2013-09-15 | 2015-12-31 | 27           | -0.2922    | -0.0108     | Right |
| An-Nahayan-ARE            | ARE     | 1971-12-02 | 2004-11-03 | 179          | -0.1714    | -0.001      | Left  |
| Khalifa Al Nahayan-ARE    | ARE     | 2004-11-03 | 2015-12-31 | 133          | 0.1679     | 0.0013      | Right |
| Menem-ARG                 | ARG     | 1989-07-08 | 1999-12-10 | 120          | 0.0563     | 5E-04       | Left  |
| de la Rúa-ARG             | ARG     | 1999-12-10 | 2001-12-21 | 24           | 0.004      | 2E-04       | NA    |
| Adolfo Rodríguez Saa-ARG  | ARG     | 2001-12-23 | 2002-01-01 | 1            | NA         | NA          | NA    |
| Eduardo Duhalde-ARG       | ARG     | 2002-01-02 | 2003-05-25 | 16           | 0.1502     | 0.0094      | NA    |
| Nestor Kirchner-ARG       | ARG     | 2003-05-25 | 2007-12-10 | 55           | -0.3799    | -0.0069     | NA    |
| Fernandez de Kirchner-ARG | ARG     | 2007-12-10 | 2015-12-10 | 96           | 1.0763     | 0.0112      | Right |
| Ter-Petrosyan-ARM         | ARM     | 1991-10-16 | 1998-02-03 | 77           | NA         | NA          | NA    |
| Kocharian-ARM             | ARM     | 1998-02-04 | 2008-04-09 | 122          | 0.1769     | 0.0015      | NA    |
| Sarkisyan-ARM             | ARM     | 2008-04-09 | 2015-12-31 | 92           | -0.0336    | -4E-04      | Right |
| Hawke-AUS                 | AUS     | 1983-03-11 | 1991-12-19 | 24           | -0.0207    | -9E-04      | Left  |
| Keating-AUS               | AUS     | 1991-12-19 | 1996-03-11 | 51           | -0.0426    | -8E-04      | NA    |
| Howard-AUS                | AUS     | 1996-03-11 | 2007-12-03 | 141          | 0.097      | 7E-04       | NA    |
| Rudd-AUS                  | AUS     | 2007-12-03 | 2010-06-24 | 30           | -0.1203    | -0.004      | NA    |
| Gillard-AUS               | AUS     | 2010-06-24 | 2013-06-27 | 36           | 0.0433     | 0.0012      | NA    |
| Rudd-AUS                  | AUS     | 2013-06-27 | 2013-09-18 | 3            | NA         | NA          | NA    |
| Abbott-AUS                | AUS     | 2013-09-18 | 2015-09-15 | 24           | -0.1515    | -0.0063     | NA    |
| Malcolm Turnbull-AUS      | AUS     | 2015-09-15 | 2015-12-31 | 3            | NA         | NA          | Right |
| Vranitzky-AUT             | AUT     | 1986-06-16 | 1997-01-28 | 85           | -0.0122    | -1E-04      | Left  |
| Klima-AUT                 | AUT     | 1997-01-28 | 2000-02-04 | 37           | -0.2208    | -0.006      | NA    |
| Schüssel-AUT              | AUT     | 2000-02-05 | 2007-01-11 | 83           | 0.1738     | 0.0021      | NA    |
| Gusenbauer-AUT            | AUT     | 2007-01-11 | 2008-12-02 | 23           | 0.1061     | 0.0046      | NA    |
| Faymann-AUT               | AUT     | 2008-12-02 | 2015-12-31 | 84           | -0.0584    | -7E-04      | Right |
| Mutalibov-AZE             | AZE     | 1991-09-08 | 1992-03-06 | 7            | NA         | NA          | NA    |
| Mamedov-AZE               | AZE     | 1992-03-06 | 1992-05-14 | 2            | NA         | NA          | NA    |
| Gambarov-AZE              | AZE     | 1992-05-19 | 1992-06-16 | 1            | NA         | NA          | NA    |
| Abulfaz Elchibey-AZE      | AZE     | 1992-06-16 | 1993-06-18 | 12           | NA         | NA          | NA    |
| H. Aliyev-AZE             | AZE     | 1993-06-24 | 2003-08-04 | 122          | -0.1728    | -0.0014     | NA    |
| Ilhama Aliyev-AZE         | AZE     | 2003-08-04 | 2015-12-31 | 148          | 0.016      | 1E-04       | Right |
| Buyoya-BDI                | BDI     | 1987-09-03 | 1993-07-10 | 43           | NA         | NA          | Left  |
| Ndadaye-BDI               | BDI     | 1993-07-10 | 1993-10-21 | 3            | NA         | NA          | NA    |
| Kinigi-BDI                | BDI     | 1993-10-27 | 1994-02-05 | 4            | NA         | NA          | NA    |

| Leader ID                 | Country | From       | To         | Spell Length | Change Tax | Rate Change | Cens  |
|---------------------------|---------|------------|------------|--------------|------------|-------------|-------|
| Ntarymira-BDI             | BDI     | 1994-02-05 | 1994-04-06 | 2            | NA         | NA          | NA    |
| Ntibantunganya-BDI        | BDI     | 1994-04-06 | 1996-07-25 | 27           | -0.1195    | -0.0044     | NA    |
| Buyoya-BDI                | BDI     | 1996-07-25 | 2003-04-30 | 81           | -0.1941    | -0.0024     | NA    |
| Ndayizeye-BDI             | BDI     | 2003-04-30 | 2005-08-26 | 28           | 0.0211     | 8E-04       | NA    |
| Nkurunziza-BDI            | BDI     | 2005-08-26 | 2015-12-31 | 124          | 0.056      | 5E-04       | Right |
| Martens-BEL               | BEL     | 1981-12-17 | 1992-03-07 | 27           | NA         | NA          | Left  |
| Dehaene-BEL               | BEL     | 1992-03-07 | 1999-07-12 | 88           | -0.0684    | -8E-04      | NA    |
| Verhofstadt-BEL           | BEL     | 1999-07-12 | 2008-03-20 | 104          | 0.5504     | 0.0053      | NA    |
| Leterme-BEL               | BEL     | 2008-03-20 | 2008-12-30 | 9            | NA         | NA          | NA    |
| van Rompuy-BEL            | BEL     | 2008-12-30 | 2009-11-25 | 11           | NA         | NA          | NA    |
| Leterme-BEL               | BEL     | 2009-11-25 | 2011-12-06 | 25           | 0.0866     | 0.0035      | NA    |
| Di Rupo-BEL               | BEL     | 2011-12-06 | 2014-10-11 | 34           | -0.0497    | -0.0015     | NA    |
| Charles Michel-BEL        | BEL     | 2014-10-11 | 2015-12-31 | 14           | -0.0284    | -0.002      | Right |
| Kerekou-BEN               | BEN     | 1972-10-27 | 1991-04-04 | 16           | NA         | NA          | Left  |
| Soglo, N-BEN              | BEN     | 1991-04-04 | 1996-04-04 | 60           | NA         | NA          | NA    |
| Kerekou-BEN               | BEN     | 1996-04-04 | 2006-04-06 | 120          | 0.173      | 0.0014      | NA    |
| Yayi Boni-BEN             | BEN     | 2006-04-06 | 2015-12-31 | 116          | 0.1615     | 0.0014      | Right |
| Campaore-BFA              | BFA     | 1987-10-15 | 2014-10-31 | 298          | -0.0126    | 0           | Left  |
| Traore-BFA                | BFA     | 2014-10-31 | 2014-11-01 | 1            | NA         | NA          | NA    |
| Kafando-BFA               | BFA     | 2014-11-18 | 2015-12-29 | 13           | 0.0234     | 0.0018      | Right |
| Ershad-BGD                | BGD     | 1982-03-27 | 1990-12-06 | 12           | -0.2042    | -0.017      | Left  |
| Ahmed-BGD                 | BGD     | 1990-12-06 | 1991-03-20 | 3            | NA         | NA          | NA    |
| Khaleda Zia-BGD           | BGD     | 1991-03-20 | 1996-03-30 | 60           | 0.2075     | 0.0035      | NA    |
| M. H. Rahman-BGD          | BGD     | 1996-03-30 | 1996-06-23 | 3            | NA         | NA          | NA    |
| Hasina Wazed-BGD          | BGD     | 1996-06-23 | 2001-07-15 | 61           | 0.0066     | 1E-04       | NA    |
| Latifur Rahman-BGD        | BGD     | 2001-07-15 | 2001-10-10 | 3            | NA         | NA          | NA    |
| Khaleda Zia-BGD           | BGD     | 2001-10-10 | 2006-10-29 | 60           | -0.1473    | -0.0025     | NA    |
| Iajuddin-BGD              | BGD     | 2006-10-29 | 2007-01-12 | 3            | NA         | NA          | NA    |
| Fakhruddin-BGD            | BGD     | 2007-01-12 | 2009-01-06 | 24           | 0.349      | 0.0145      | NA    |
| Hasina Wazed-BGD          | BGD     | 2009-01-06 | 2015-12-31 | 83           | 0.0526     | 6E-04       | Right |
| Mladenov-BGR              | BGR     | 1989-11-10 | 1990-07-06 | 7            | NA         | NA          | Left  |
| Lukanov-BGR               | BGR     | 1990-07-06 | 1990-12-07 | 5            | NA         | NA          | NA    |
| Popov-BGR                 | BGR     | 1990-12-07 | 1991-11-08 | 11           | NA         | NA          | NA    |
| Filip Dimitrov-BGR        | BGR     | 1991-11-08 | 1992-12-30 | 13           | NA         | NA          | NA    |
| Berov-BGR                 | BGR     | 1992-12-30 | 1994-10-17 | 22           | NA         | NA          | NA    |
| Indzhova-BGR              | BGR     | 1994-10-17 | 1995-01-25 | 3            | NA         | NA          | NA    |
| Videnov-BGR               | BGR     | 1995-01-25 | 1997-02-13 | 25           | 0.0199     | 8E-04       | NA    |
| Sofiyanski-BGR            | BGR     | 1997-02-13 | 1997-05-21 | 3            | NA         | NA          | NA    |
| Kostov-BGR                | BGR     | 1997-05-21 | 2001-07-21 | 50           | 0.0081     | 2E-04       | NA    |
| Saksgoburggotski-BGR      | BGR     | 2001-07-24 | 2005-08-16 | 49           | 0.2147     | 0.0044      | NA    |
| Stanishev-BGR             | BGR     | 2005-08-16 | 2009-07-27 | 47           | 0.1862     | 0.004       | NA    |
| Boyko Borisov-BGR         | BGR     | 2009-07-27 | 2013-03-13 | 44           | -0.0228    | -5E-04      | NA    |
| Raykov-BGR                | BGR     | 2013-03-13 | 2013-05-29 | 2            | NA         | NA          | NA    |
| Oresharski-BGR            | BGR     | 2013-05-29 | 2014-08-05 | 15           | -0.0129    | -9E-04      | NA    |
| Bliznashki-BGR            | BGR     | 2014-08-05 | 2014-11-07 | 3            | NA         | NA          | NA    |
| Boyko Borisov-BGR         | BGR     | 2014-11-07 | 2015-12-31 | 13           | 0.0023     | 2E-04       | Right |
| Isa Ibn Al-Khalifah-BHR   | BHR     | 1971-08-15 | 1999-03-06 | 111          | 0.0723     | 7E-04       | Left  |
| H. I. Ibn Al-Khalifah-BHR | BHR     | 1999-03-06 | 2015-12-31 | 201          | -0.2729    | -0.0014     | Right |
| Izetbegovic-BIH           | BIH     | 1990-12-20 | 1998-10-13 | 95           | NA         | NA          | NA    |
| Radisic-BIH               | BIH     | 1998-10-13 | 1999-06-15 | 8            | NA         | NA          | NA    |

| Leader ID                 | Country | From       | To         | Spell Length | Change Tax | Rate Change | Cens  |
|---------------------------|---------|------------|------------|--------------|------------|-------------|-------|
| Jelavic-BIH               | BIH     | 1999-06-15 | 2000-02-14 | 8            | NA         | NA          | NA    |
| Alija Izetbegovic-BIH     | BIH     | 2000-02-14 | 2000-10-14 | 8            | NA         | NA          | NA    |
| Radisic-BIH               | BIH     | 2000-10-14 | 2001-06-14 | 8            | NA         | NA          | NA    |
| Krizanovic-BIH            | BIH     | 2001-06-14 | 2002-02-14 | 8            | NA         | NA          | NA    |
| Belkic-BIH                | BIH     | 2002-02-14 | 2002-10-28 | 8            | NA         | NA          | NA    |
| Sarovic-BIH               | BIH     | 2002-10-28 | 2003-04-02 | 6            | NA         | NA          | NA    |
| Borislav Paravac-BIH      | BIH     | 2003-04-10 | 2003-06-27 | 2            | NA         | NA          | NA    |
| Dragan Covic-BIH          | BIH     | 2003-06-27 | 2004-02-28 | 8            | NA         | NA          | NA    |
| Sulejman Tihic-BIH        | BIH     | 2004-02-28 | 2004-10-28 | 8            | NA         | NA          | NA    |
| Borislav Paravac-BIH      | BIH     | 2004-10-28 | 2005-06-28 | 8            | NA         | NA          | NA    |
| Miro Jovic-BIH            | BIH     | 2005-06-28 | 2006-02-28 | 8            | NA         | NA          | NA    |
| Sulejman Tihic-BIH        | BIH     | 2006-02-28 | 2006-11-06 | 9            | NA         | NA          | NA    |
| Radmanovic-BIH            | BIH     | 2006-11-06 | 2007-07-06 | 8            | NA         | NA          | NA    |
| Zeljko Komsic-BIH         | BIH     | 2007-07-06 | 2008-03-06 | 8            | NA         | NA          | NA    |
| Silajdzic-BIH             | BIH     | 2008-03-06 | 2008-11-06 | 8            | NA         | NA          | NA    |
| Radmanovic-BIH            | BIH     | 2008-11-06 | 2009-07-06 | 8            | NA         | NA          | NA    |
| Zeljko Komsic-BIH         | BIH     | 2009-07-06 | 2010-03-06 | 8            | NA         | NA          | NA    |
| Silajdzic-BIH             | BIH     | 2010-03-06 | 2010-11-10 | 8            | NA         | NA          | NA    |
| Radmanovic-BIH            | BIH     | 2010-11-10 | 2011-07-10 | 8            | NA         | NA          | NA    |
| Zeljko Komsic-BIH         | BIH     | 2011-07-10 | 2014-03-10 | 32           | -0.0175    | -5E-04      | NA    |
| Bakir Izetbegovic-BIH     | BIH     | 2014-03-10 | 2014-11-17 | 8            | NA         | NA          | NA    |
| Ivanic-BIH                | BIH     | 2014-11-17 | 2015-07-17 | 8            | NA         | NA          | NA    |
| Dragan Covic-BIH          | BIH     | 2015-07-17 | 2015-12-31 | 5            | NA         | NA          | Right |
| Shushkevich-BLR           | BLR     | 1991-09-18 | 1994-01-26 | 29           | NA         | NA          | NA    |
| Hryb-BLR                  | BLR     | 1994-01-28 | 1994-07-20 | 6            | NA         | NA          | NA    |
| Lukashenko-BLR            | BLR     | 1994-07-20 | 2015-12-31 | 257          | -0.2318    | -9E-04      | Right |
| Price-BLZ                 | BLZ     | 1989-11-07 | 1993-07-03 | 43           | NA         | NA          | Left  |
| Esquivel-BLZ              | BLZ     | 1993-07-03 | 1998-08-28 | 61           | NA         | NA          | NA    |
| Musa-BLZ                  | BLZ     | 1998-08-28 | 2008-02-08 | 114          | 0.1281     | 0.0011      | NA    |
| D.Barrow-BLZ              | BLZ     | 2008-02-08 | 2015-12-31 | 94           | 0.1417     | 0.0015      | Right |
| Paz Zamora-BOL            | BOL     | 1989-08-06 | 1993-08-06 | 44           | 0.1075     | 0.0024      | Left  |
| Gonzalo S. de Lozada-BOL  | BOL     | 1993-08-06 | 1997-08-06 | 48           | -0.1779    | -0.0037     | NA    |
| Banzer Suarez-BOL         | BOL     | 1997-08-06 | 2001-08-07 | 48           | 0.0503     | 0.001       | NA    |
| Jorge Quiroga Ramirez-BOL | BOL     | 2001-08-07 | 2002-08-06 | 12           | -0.0647    | -0.0054     | NA    |
| Gonzalo S. de Lozada-BOL  | BOL     | 2002-08-08 | 2003-10-17 | 14           | -0.098     | -0.007      | NA    |
| Carlos Mesa-BOL           | BOL     | 2003-10-17 | 2005-06-09 | 20           | -0.0286    | -0.0014     | NA    |
| Enrique Rodriguez-BOL     | BOL     | 2005-06-09 | 2006-01-22 | 7            | NA         | NA          | NA    |
| Juan Morales-BOL          | BOL     | 2006-01-22 | 2015-12-31 | 119          | 0.214      | 0.0018      | Right |
| Sarnay-BRA                | BRA     | 1985-03-21 | 1990-03-15 | 3            | NA         | NA          | Left  |
| Mello-BRA                 | BRA     | 1990-03-15 | 1992-10-02 | 31           | -0.2984    | -0.0096     | NA    |
| Franco, Itamar-BRA        | BRA     | 1992-10-02 | 1994-12-31 | 26           | 0.1544     | 0.0059      | NA    |
| Cardoso-BRA               | BRA     | 1995-01-01 | 2003-01-01 | 97           | -0.3419    | -0.0035     | NA    |
| Lula da Silva-BRA         | BRA     | 2003-01-01 | 2011-01-01 | 96           | 0.505      | 0.0053      | NA    |
| Rousseff-BRA              | BRA     | 2011-01-01 | 2015-12-31 | 59           | -0.5089    | -0.0086     | Right |
| Masire-BWA                | BWA     | 1980-07-13 | 1998-03-31 | 99           | NA         | NA          | Left  |
| Mogae-BWA                 | BWA     | 1998-03-31 | 2008-04-01 | 121          | 0.0369     | 3E-04       | NA    |
| Ian Khama-BWA             | BWA     | 2008-04-01 | 2015-12-31 | 92           | -0.1158    | -0.0013     | Right |
| Kolingba-CAF              | CAF     | 1981-09-01 | 1993-10-22 | 46           | NA         | NA          | Left  |
| Patasse-CAF               | CAF     | 1993-10-22 | 2003-03-15 | 113          | 0.0458     | 4E-04       | NA    |
| Francois Bozize-CAF       | CAF     | 2003-03-15 | 2013-03-24 | 120          | -0.0962    | -8E-04      | NA    |

| Leader ID                 | Country | From       | To         | Spell Length | Change Tax | Rate Change | Cens  |
|---------------------------|---------|------------|------------|--------------|------------|-------------|-------|
| Djotodia-CAF              | CAF     | 2013-03-24 | 2014-01-10 | 10           | NA         | NA          | NA    |
| Catherine Samba-Panza-CAF | CAF     | 2014-01-23 | 2015-12-31 | 23           | 0.0094     | 4E-04       | Right |
| Mulroney-CAN              | CAN     | 1984-09-17 | 1993-06-25 | 42           | -0.1391    | -0.0033     | Left  |
| Kim Campbell-CAN          | CAN     | 1993-06-25 | 1993-11-04 | 5            | NA         | NA          | NA    |
| Chretien-CAN              | CAN     | 1993-11-04 | 2003-12-12 | 121          | -0.0534    | -4E-04      | NA    |
| Paul Martin-CAN           | CAN     | 2003-12-12 | 2006-02-06 | 26           | 0.05       | 0.0019      | NA    |
| Harper-CAN                | CAN     | 2006-02-06 | 2015-11-04 | 117          | -0.0025    | 0           | NA    |
| Justin Trudeau-CAN        | CAN     | 2015-11-04 | 2015-12-31 | 1            | NA         | NA          | Right |
| Koller-CHE                | CHE     | 1990-01-01 | 1990-12-31 | 12           | NA         | NA          | NA    |
| Cotti-CHE                 | CHE     | 1991-01-01 | 1991-12-31 | 12           | NA         | NA          | NA    |
| Felber-CHE                | CHE     | 1992-01-01 | 1992-12-31 | 12           | NA         | NA          | NA    |
| Ogi-CHE                   | CHE     | 1993-01-01 | 1993-12-31 | 12           | 0.1648     | 0.0137      | NA    |
| Stich-CHE                 | CHE     | 1994-01-01 | 1994-12-31 | 12           | 0.1275     | 0.0106      | NA    |
| Villiger-CHE              | CHE     | 1995-01-01 | 1995-12-31 | 12           | -0.005     | -4E-04      | NA    |
| Delamuraz-CHE             | CHE     | 1996-01-01 | 1996-12-31 | 12           | -0.0328    | -0.0027     | NA    |
| Koller-CHE                | CHE     | 1997-01-01 | 1997-12-31 | 12           | 0.014      | 0.0012      | NA    |
| Cotti-CHE                 | CHE     | 1998-01-01 | 1998-12-31 | 12           | 0.0565     | 0.0047      | NA    |
| Dreifuss-CHE              | CHE     | 1999-01-01 | 1999-12-31 | 12           | -0.039     | -0.0033     | NA    |
| Ogi-CHE                   | CHE     | 2000-01-01 | 2000-12-31 | 12           | -0.056     | -0.0047     | NA    |
| Leuenberger-CHE           | CHE     | 2001-01-01 | 2001-12-31 | 12           | 0.0521     | 0.0043      | NA    |
| Villiger-CHE              | CHE     | 2002-01-01 | 2002-12-31 | 12           | 0.1107     | 0.0092      | NA    |
| Pascal Couchepin-CHE      | CHE     | 2003-01-01 | 2003-12-31 | 12           | 0.0362     | 0.003       | NA    |
| Joseph Deiss-CHE          | CHE     | 2004-01-01 | 2004-12-31 | 12           | 0.1055     | 0.0088      | NA    |
| Schmid-CHE                | CHE     | 2005-01-01 | 2005-12-31 | 12           | -0.1382    | -0.0115     | NA    |
| Leuenberger-CHE           | CHE     | 2006-01-01 | 2006-12-31 | 12           | 0.075      | 0.0062      | NA    |
| Calmy-Rey-CHE             | CHE     | 2007-01-01 | 2007-12-31 | 12           | 0.0974     | 0.0081      | NA    |
| Pascal Couchepin-CHE      | CHE     | 2008-01-01 | 2008-12-31 | 12           | -0.1581    | -0.0132     | NA    |
| Hans-Rudolf Merz-CHE      | CHE     | 2009-01-01 | 2009-12-31 | 12           | 0.1986     | 0.0166      | NA    |
| Doris Leuthard-CHE        | CHE     | 2010-01-01 | 2010-12-31 | 12           | 0.12       | 0.01        | NA    |
| Calmy-Rey-CHE             | CHE     | 2011-01-01 | 2011-12-31 | 12           | 0.034      | 0.0028      | NA    |
| Eveline Widmer-S.-CHE     | CHE     | 2012-01-01 | 2012-12-31 | 12           | -0.0358    | -0.003      | NA    |
| Ueli Maurer-CHE           | CHE     | 2013-01-01 | 2013-12-31 | 12           | 0.0761     | 0.0063      | NA    |
| Didier Burkhalter-CHE     | CHE     | 2014-01-01 | 2014-12-31 | 12           | -0.0969    | -0.0081     | NA    |
| Simonetta Sommaruga-CHE   | CHE     | 2015-01-01 | 2015-12-31 | 12           | 0.0315     | 0.0026      | Right |
| Pinochet-CHL              | CHL     | 1973-09-11 | 1990-03-11 | 3            | NA         | NA          | Left  |
| Aylwin-CHL                | CHL     | 1990-03-11 | 1994-03-11 | 48           | 0.0619     | 0.0013      | NA    |
| Frei Ruiz-Tagle-CHL       | CHL     | 1994-03-11 | 2000-03-11 | 72           | -0.0057    | -1E-04      | NA    |
| Ricardo Lagos Escobar-CHL | CHL     | 2000-03-12 | 2006-03-11 | 72           | 0.2281     | 0.0032      | NA    |
| Michelle Bachelet-CHL     | CHL     | 2006-03-11 | 2010-03-11 | 48           | -0.1052    | -0.0022     | NA    |
| Sebastian Piñera-CHL      | CHL     | 2010-03-11 | 2014-03-11 | 48           | 0.0408     | 9E-04       | NA    |
| Michelle Bachelet-CHL     | CHL     | 2014-03-11 | 2015-12-31 | 21           | -0.213     | -0.0101     | Right |
| Deng Xiaoping-CHN         | CHN     | 1980-09-10 | 1997-02-19 | 86           | -0.1161    | -0.0013     | Left  |
| Jiang Zemin-CHN           | CHN     | 1997-02-19 | 2003-03-15 | 73           | 0.0172     | 2E-04       | NA    |
| Hu Jintao-CHN             | CHN     | 2003-03-15 | 2012-11-15 | 116          | 0.208      | 0.0018      | NA    |
| Xi Jinping-CHN            | CHN     | 2012-11-15 | 2015-12-31 | 37           | 0.1629     | 0.0044      | Right |
| Houphouet-Boigny-CIV      | CIV     | 1960-08-07 | 1993-12-07 | 48           | NA         | NA          | Left  |
| Konan Bedie-CIV           | CIV     | 1993-12-07 | 1999-12-25 | 72           | NA         | NA          | NA    |
| Guei-CIV                  | CIV     | 1999-12-25 | 2000-10-25 | 10           | NA         | NA          | NA    |
| Laurent Gbagbo-CIV        | CIV     | 2000-10-26 | 2011-04-11 | 126          | 0.181      | 0.0014      | NA    |
| Ouattara-CIV              | CIV     | 2011-04-11 | 2015-12-31 | 56           | -0.2886    | -0.0052     | Right |

| Leader ID                  | Country | From       | To         | Spell Length | Change Tax | Rate Change | Cens  |
|----------------------------|---------|------------|------------|--------------|------------|-------------|-------|
| Biya-CMR                   | CMR     | 1982-11-06 | 2015-12-31 | 312          | -0.2983    | -0.001      | Both  |
| Mobutu-COD                 | COD     | 1965-11-25 | 1997-05-16 | 89           | NA         | NA          | Left  |
| Laurent Kabila-COD         | COD     | 1997-05-16 | 2001-01-16 | 44           | 0.9751     | 0.0222      | NA    |
| Joseph Kabila-COD          | COD     | 2001-01-17 | 2015-12-31 | 179          | -4.6265    | -0.0258     | Right |
| Nguesso-COG                | COG     | 1979-02-08 | 1992-08-20 | 32           | NA         | NA          | Left  |
| Lissouba-COG               | COG     | 1992-08-31 | 1997-10-15 | 62           | NA         | NA          | NA    |
| Nguesso-COG                | COG     | 1997-10-15 | 2015-12-31 | 218          | 0.1663     | 8E-04       | Right |
| Vargas-COL                 | COL     | 1986-08-07 | 1990-08-07 | 8            | NA         | NA          | Left  |
| C. Gaviria Trujillo-COL    | COL     | 1990-08-07 | 1994-08-07 | 48           | NA         | NA          | NA    |
| Pizano-COL                 | COL     | 1994-08-07 | 1998-08-07 | 48           | NA         | NA          | NA    |
| Arango-COL                 | COL     | 1998-08-07 | 2002-08-07 | 48           | -0.005     | -1E-04      | NA    |
| Alvaro Uribe Velez-COL     | COL     | 2002-08-08 | 2010-08-07 | 96           | 0.4013     | 0.0042      | NA    |
| Santos Calderon-COL        | COL     | 2010-08-07 | 2015-12-31 | 64           | -0.2148    | -0.0034     | Right |
| Arias-CRI                  | CRI     | 1986-05-08 | 1990-05-08 | 5            | NA         | NA          | Left  |
| Calderon Fournier-CRI      | CRI     | 1990-05-08 | 1994-05-08 | 48           | 0.0137     | 3E-04       | NA    |
| Figueres Olsen-CRI         | CRI     | 1994-05-08 | 1998-05-08 | 48           | 0.1351     | 0.0028      | NA    |
| Rodriguez Echeverria-CRI   | CRI     | 1998-05-08 | 2002-05-08 | 48           | 0.0372     | 8E-04       | NA    |
| de la Espriella-CRI        | CRI     | 2002-05-09 | 2006-05-08 | 48           | 0.0523     | 0.0011      | NA    |
| Arias-CRI                  | CRI     | 2006-05-08 | 2010-05-08 | 48           | 4E-04      | 0           | NA    |
| Laura Chinchilla M.-CRI    | CRI     | 2010-05-08 | 2014-05-08 | 48           | -0.1163    | -0.0024     | NA    |
| Solis Rivera-CRI           | CRI     | 2014-05-08 | 2015-12-31 | 19           | 0.1275     | 0.0067      | Right |
| Vassiliou-CYP              | CYP     | 1988-02-28 | 1993-02-28 | 38           | NA         | NA          | Left  |
| Clerides-CYP               | CYP     | 1993-02-28 | 2003-02-28 | 120          | NA         | NA          | NA    |
| Tassos N. Papadopoulos-CYP | CYP     | 2003-02-28 | 2008-02-28 | 60           | 0.1497     | 0.0025      | NA    |
| Dimitris Christofias-CYP   | CYP     | 2008-02-28 | 2013-02-28 | 60           | -4E-04     | 0           | NA    |
| Anastasiades-CYP           | CYP     | 2013-02-28 | 2015-12-31 | 34           | -0.1392    | -0.0041     | Right |
| Klaus-CZE                  | CZE     | 1993-01-01 | 1997-12-17 | 60           | NA         | NA          | NA    |
| Tosovsky-CZE               | CZE     | 1997-12-17 | 1998-07-17 | 7            | NA         | NA          | NA    |
| Zeman-CZE                  | CZE     | 1998-07-17 | 2002-07-12 | 48           | -0.1022    | -0.0021     | NA    |
| Spidla-CZE                 | CZE     | 2002-07-12 | 2004-07-26 | 24           | 0.0358     | 0.0015      | NA    |
| Stanislav Gross-CZE        | CZE     | 2004-07-26 | 2005-04-25 | 9            | NA         | NA          | NA    |
| Paroubek-CZE               | CZE     | 2005-04-25 | 2006-09-04 | 17           | 0.0483     | 0.0028      | NA    |
| Topolánek-CZE              | CZE     | 2006-09-04 | 2009-05-08 | 32           | -0.0549    | -0.0017     | NA    |
| Fischer-CZE                | CZE     | 2009-05-08 | 2010-07-13 | 14           | -0.0955    | -0.0068     | NA    |
| Necas-CZE                  | CZE     | 2010-07-13 | 2013-07-10 | 36           | -0.1523    | -0.0042     | NA    |
| Rusnok-CZE                 | CZE     | 2013-07-10 | 2014-01-29 | 6            | NA         | NA          | NA    |
| Sobotka-CZE                | CZE     | 2014-01-29 | 2015-12-31 | 23           | -0.1471    | -0.0064     | Right |
| Kohl-DEU                   | DEU     | 1982-10-01 | 1998-10-27 | 106          | -0.1275    | -0.0012     | Left  |
| Schroder-DEU               | DEU     | 1998-10-27 | 2005-11-22 | 85           | 0.1235     | 0.0015      | NA    |
| Merkel-DEU                 | DEU     | 2005-11-22 | 2015-12-31 | 121          | -0.1115    | -9E-04      | Right |
| Schluter-DNK               | DNK     | 1982-09-10 | 1993-01-25 | 37           | NA         | NA          | Left  |
| Nyrup Rasmussen-DNK        | DNK     | 1993-01-25 | 2001-11-27 | 106          | -0.0167    | -2E-04      | NA    |
| Fogh Rasmussen-DNK         | DNK     | 2001-11-27 | 2009-04-05 | 89           | 0.3633     | 0.0041      | NA    |
| Lars L. Rasmussen-DNK      | DNK     | 2009-04-05 | 2011-10-03 | 30           | 0.1398     | 0.0047      | NA    |
| Thorning-Schmidt-DNK       | DNK     | 2011-10-03 | 2015-06-28 | 44           | -0.2954    | -0.0067     | NA    |
| Lars L. Rasmussen-DNK      | DNK     | 2015-06-28 | 2015-12-31 | 6            | NA         | NA          | Right |
| Balaguer-DOM               | DOM     | 1986-08-16 | 1996-08-16 | 80           | NA         | NA          | Left  |
| Fernandez Reyna-DOM        | DOM     | 1996-08-16 | 2000-08-16 | 48           | NA         | NA          | NA    |

| Leader ID              | Country | From       | To         | Spell Length | Change Tax | Rate Change | Cens  |
|------------------------|---------|------------|------------|--------------|------------|-------------|-------|
| Hipolito Mejia-DOM     | DOM     | 2000-08-17 | 2004-08-16 | 48           | -0.124     | -0.0026     | NA    |
| Fernandez Reyna-DOM    | DOM     | 2004-08-16 | 2012-08-16 | 96           | 0.1837     | 0.0019      | NA    |
| Medina-DOM             | DOM     | 2012-08-16 | 2015-12-31 | 40           | -0.0172    | -4E-04      | Right |
| Benjedid-DZA           | DZA     | 1979-02-07 | 1992-01-11 | 25           | NA         | NA          | Left  |
| Boudiaf-DZA            | DZA     | 1992-01-14 | 1992-06-29 | 5            | NA         | NA          | NA    |
| Kafi-DZA               | DZA     | 1992-07-02 | 1994-01-31 | 19           | NA         | NA          | NA    |
| Zeroual-DZA            | DZA     | 1994-01-31 | 1999-04-27 | 63           | 0.1421     | 0.0023      | NA    |
| Bouteflika-DZA         | DZA     | 1999-04-27 | 2015-12-31 | 200          | -0.4509    | -0.0023     | Right |
| Borja Cevallos-ECU     | ECU     | 1988-08-10 | 1992-08-10 | 32           | 0.0015     | 0           | Left  |
| Duran Ballen-ECU       | ECU     | 1992-08-10 | 1996-08-10 | 48           | 0.0072     | 2E-04       | NA    |
| Bucaram Ortiz-ECU      | ECU     | 1996-08-10 | 1997-02-06 | 6            | NA         | NA          | NA    |
| Alarcon Fabian-ECU     | ECU     | 1997-02-11 | 1998-08-10 | 18           | 0.0478     | 0.0027      | NA    |
| Mahuad-ECU             | ECU     | 1998-08-10 | 2000-01-21 | 17           | -0.2436    | -0.0143     | NA    |
| Gustavo Noboa-ECU      | ECU     | 2000-01-22 | 2003-01-15 | 36           | 0.1057     | 0.0029      | NA    |
| Lucio Gutierrez-ECU    | ECU     | 2003-01-15 | 2005-04-20 | 27           | -0.0562    | -0.0021     | NA    |
| Alfredo Palacio-ECU    | ECU     | 2005-04-20 | 2007-01-15 | 21           | -0.0016    | -1E-04      | NA    |
| Rafael Correa-ECU      | ECU     | 2007-01-15 | 2015-12-31 | 107          | 0.2025     | 0.0019      | Right |
| Mubarak-EGY            | EGY     | 1981-10-14 | 2011-02-11 | 254          | -0.6603    | -0.0026     | Left  |
| Tantawi-EGY            | EGY     | 2011-02-11 | 2012-06-30 | 16           | -0.0266    | -0.0017     | NA    |
| Morsi-EGY              | EGY     | 2012-06-30 | 2013-07-03 | 13           | 0.0705     | 0.0054      | NA    |
| Mansour-EGY            | EGY     | 2013-07-04 | 2014-06-08 | 11           | NA         | NA          | NA    |
| al-Sisi-EGY            | EGY     | 2014-06-08 | 2015-12-31 | 18           | 0.3521     | 0.0196      | Right |
| Gonzalez Marquez-ESP   | ESP     | 1982-12-02 | 1996-05-05 | 77           | 0.096      | 0.0012      | Left  |
| Aznar-ESP              | ESP     | 1996-05-05 | 2004-04-17 | 95           | -0.1676    | -0.0018     | NA    |
| Rodriguez Zapatero-ESP | ESP     | 2004-04-17 | 2011-12-20 | 92           | 0.2372     | 0.0026      | NA    |
| Rajoy Brey-ESP         | ESP     | 2011-12-20 | 2015-12-31 | 48           | -0.1621    | -0.0034     | Right |
| Savisaar-EST           | EST     | 1991-09-06 | 1992-01-23 | 5            | NA         | NA          | NA    |
| Vahi-EST               | EST     | 1992-01-30 | 1992-10-08 | 9            | NA         | NA          | NA    |
| Laar-EST               | EST     | 1992-10-28 | 1994-11-08 | 25           | NA         | NA          | NA    |
| Tarand-EST             | EST     | 1994-11-08 | 1995-04-17 | 5            | NA         | NA          | NA    |
| Vahi-EST               | EST     | 1995-04-17 | 1997-03-17 | 23           | NA         | NA          | NA    |
| Siimann-EST            | EST     | 1997-03-17 | 1999-03-25 | 24           | NA         | NA          | NA    |
| Laar-EST               | EST     | 1999-03-25 | 2002-01-28 | 34           | 0.0188     | 6E-04       | NA    |
| Kallas-EST             | EST     | 2002-01-28 | 2003-04-10 | 15           | 0.0929     | 0.0062      | NA    |
| Parts-EST              | EST     | 2003-04-10 | 2005-04-13 | 24           | 0.1837     | 0.0077      | NA    |
| Ansip-EST              | EST     | 2005-04-13 | 2014-03-26 | 107          | 0.3937     | 0.0037      | NA    |
| Roivas-EST             | EST     | 2014-03-26 | 2015-12-31 | 21           | -0.207     | -0.0099     | Right |
| Mengistu Marriam-ETH   | ETH     | 1977-02-11 | 1991-05-21 | 17           | NA         | NA          | Left  |
| Meles Zenawi-ETH       | ETH     | 1991-05-27 | 2012-08-20 | 255          | 0.116      | 5E-04       | NA    |
| Desalegn-ETH           | ETH     | 2012-08-20 | 2015-12-31 | 40           | 0.0461     | 0.0012      | Right |
| Koivisto-FIN           | FIN     | 1981-09-11 | 1994-03-01 | 51           | NA         | NA          | Left  |
| Marthi Ahtisaari-FIN   | FIN     | 1994-03-01 | 2000-03-01 | 72           | -0.3319    | -0.0046     | NA    |
| Halonon-FIN            | FIN     | 2000-03-01 | 2012-03-01 | 144          | 0.2898     | 0.002       | NA    |
| Sauli Niinistö-FIN     | FIN     | 2012-03-01 | 2015-12-31 | 45           | -0.1571    | -0.0035     | Right |
| Mitterand-FRA          | FRA     | 1981-05-21 | 1995-05-17 | 65           | 0.2866     | 0.0044      | Left  |
| Chirac-FRA             | FRA     | 1995-05-17 | 2007-05-16 | 144          | -0.2225    | -0.0015     | NA    |
| Sarkozy-FRA            | FRA     | 2007-05-16 | 2012-05-15 | 60           | -0.0311    | -5E-04      | NA    |
| Hollande-FRA           | FRA     | 2012-05-15 | 2015-12-31 | 43           | -0.1715    | -0.004      | Right |
| Bongo-GAB              | GAB     | 1967-11-28 | 2009-06-08 | 234          | 0.1527     | 7E-04       | Left  |
| Rose F. Rogombe-GAB    | GAB     | 2009-06-10 | 2009-10-16 | 4            | NA         | NA          | NA    |

| Leader ID                  | Country | From       | To         | Spell Length | Change Tax | Rate Change | Cens  |
|----------------------------|---------|------------|------------|--------------|------------|-------------|-------|
| Ali Bongo Ondimba-GAB      | GAB     | 2009-10-16 | 2015-12-31 | 74           | -0.1325    | -0.0018     | Right |
| Thatcher-GBR               | GBR     | 1979-05-04 | 1990-11-28 | 11           | NA         | NA          | Left  |
| Major-GBR                  | GBR     | 1990-11-28 | 1997-05-02 | 78           | 0.1393     | 0.0018      | NA    |
| Blair-GBR                  | GBR     | 1997-05-02 | 2007-06-27 | 121          | 0.2164     | 0.0018      | NA    |
| Brown-GBR                  | GBR     | 2007-06-27 | 2010-05-11 | 35           | -0.3087    | -0.0088     | NA    |
| Cameron-GBR                | GBR     | 2010-05-11 | 2015-12-31 | 67           | -0.0735    | -0.0011     | Right |
| Gamsakhurdia-GEO           | GEO     | 1991-04-12 | 1992-01-06 | 10           | NA         | NA          | NA    |
| Ioseliani-GEO              | GEO     | 1992-01-06 | 1992-03-10 | 2            | NA         | NA          | NA    |
| Shevardnadze-GEO           | GEO     | 1992-03-10 | 2003-11-23 | 140          | NA         | NA          | NA    |
| Burdjanadze-GEO            | GEO     | 2003-11-23 | 2004-01-25 | 2            | NA         | NA          | NA    |
| Saakashvili-GEO            | GEO     | 2004-01-25 | 2007-11-25 | 46           | NA         | NA          | NA    |
| Burdzhanadze-GEO           | GEO     | 2007-11-25 | 2008-01-20 | 2            | NA         | NA          | NA    |
| Saakashvili-GEO            | GEO     | 2008-01-20 | 2013-11-17 | 70           | -0.2654    | -0.0038     | NA    |
| Margvelashvili-GEO         | GEO     | 2013-11-17 | 2015-12-31 | 25           | -0.1583    | -0.0063     | Right |
| Rawlings-GHA               | GHA     | 1981-12-31 | 2001-01-07 | 133          | -0.234     | -0.0018     | Left  |
| John Agyekum Kufuor-GHA    | GHA     | 2001-01-08 | 2009-01-07 | 96           | 0.4194     | 0.0044      | NA    |
| Atta Mills-GHA             | GHA     | 2009-01-07 | 2012-07-24 | 42           | -0.1077    | -0.0026     | NA    |
| John Mahama-GHA            | GHA     | 2012-07-24 | 2015-12-31 | 41           | 0.1842     | 0.0045      | Right |
| Conte-GIN                  | GIN     | 1984-04-03 | 2008-12-22 | 228          | 0.2924     | 0.0013      | Left  |
| Dadis Camara-GIN           | GIN     | 2008-12-23 | 2009-12-05 | 12           | -0.1894    | -0.0158     | NA    |
| Sekouba Konate-GIN         | GIN     | 2009-12-05 | 2010-12-21 | 12           | 0.0188     | 0.0016      | NA    |
| Conde-GIN                  | GIN     | 2010-12-21 | 2015-12-31 | 60           | 0.3647     | 0.0061      | Right |
| Jawara-GMB                 | GMB     | 1965-02-18 | 1994-07-22 | 55           | NA         | NA          | Left  |
| Jammeh-GMB                 | GMB     | 1994-07-22 | 2015-12-31 | 257          | 0.3748     | 0.0015      | Right |
| Vieira-GNB                 | GNB     | 1980-11-14 | 1999-05-07 | 113          | NA         | NA          | Left  |
| Sanha-GNB                  | GNB     | 1999-05-14 | 2000-02-17 | 9            | NA         | NA          | NA    |
| Kumba Iala-GNB             | GNB     | 2000-02-18 | 2003-09-14 | 43           | 0.1608     | 0.0037      | NA    |
| Henrique Pereira Rosa-GNB  | GNB     | 2003-09-28 | 2005-10-01 | 25           | 0.0141     | 6E-04       | NA    |
| Vieira-GNB                 | GNB     | 2005-10-01 | 2009-03-02 | 41           | 0.2857     | 0.007       | NA    |
| Raimundo Perreira-GNB      | GNB     | 2009-03-02 | 2009-09-08 | 6            | NA         | NA          | NA    |
| Sanha-GNB                  | GNB     | 2009-09-08 | 2011-12-31 | 27           | 0.0074     | 3E-04       | NA    |
| Raimundo Pereira-GNB       | GNB     | 2012-01-09 | 2012-04-12 | 4            | NA         | NA          | NA    |
| Mamadu Ture Kuruma-GNB     | GNB     | 2012-04-12 | 2012-05-11 | 1            | NA         | NA          | NA    |
| Manuel S. Nhamadjo-GNB     | GNB     | 2012-05-11 | 2014-06-23 | 25           | -3E-04     | 0           | NA    |
| Vaz-GNB                    | GNB     | 2014-06-23 | 2015-12-31 | 18           | -0.0928    | -0.0052     | Right |
| Nguema Mbasogo-GNQ         | GNQ     | 1979-08-03 | 2015-12-31 | 312          | -0.6219    | -0.002      | Both  |
| Zolotas-GRC                | GRC     | 1989-11-28 | 1990-04-10 | 4            | NA         | NA          | Left  |
| Mitsotakis-GRC             | GRC     | 1990-04-11 | 1993-10-13 | 42           | NA         | NA          | NA    |
| A. Papandreou-GRC          | GRC     | 1993-10-13 | 1995-11-20 | 25           | 0.0538     | 0.0022      | NA    |
| Tsokhatzopoulos-GRC        | GRC     | 1995-11-20 | 1996-01-22 | 2            | NA         | NA          | NA    |
| Simitis-GRC                | GRC     | 1996-01-22 | 2004-03-10 | 98           | -0.1977    | -0.002      | NA    |
| K. Karamanlis-GRC          | GRC     | 2004-03-10 | 2009-10-06 | 67           | 0.3551     | 0.0053      | NA    |
| Georgios Papandreou-GRC    | GRC     | 2009-10-06 | 2011-11-11 | 25           | 0.6312     | 0.0252      | NA    |
| Loukas Papatimos-GRC       | GRC     | 2011-11-11 | 2012-05-16 | 6            | NA         | NA          | NA    |
| Panagiotis Pikrammenos-GRC | GRC     | 2012-05-16 | 2012-06-20 | 1            | NA         | NA          | NA    |
| Antonis K. Samaras-GRC     | GRC     | 2012-06-20 | 2015-01-26 | 31           | -0.1087    | -0.0035     | NA    |
| Alexis Tsipras-GRC         | GRC     | 2015-01-26 | 2015-12-31 | 11           | NA         | NA          | Right |
| Cerezo-GTM                 | GTM     | 1986-01-14 | 1991-01-14 | 13           | 0.0819     | 0.0063      | Left  |
| Serrano Elias-GTM          | GTM     | 1991-01-14 | 1993-05-31 | 28           | -0.1305    | -0.0047     | NA    |
| Espina Salguero-GTM        | GTM     | 1993-05-31 | 1993-06-01 | 1            | NA         | NA          | NA    |



| Leader ID                 | Country | From       | To         | Spell Length | Change Tax | Rate Change | Cens  |
|---------------------------|---------|------------|------------|--------------|------------|-------------|-------|
| Leon Carpio-GTM           | GTM     | 1993-06-01 | 1996-01-14 | 31           | 0.0144     | 5E-04       | NA    |
| Arzu Yrigoyen-GTM         | GTM     | 1996-01-14 | 2000-01-14 | 48           | 0.0013     | 0           | NA    |
| Alfonso P. Cabrera-GTM    | GTM     | 2000-01-15 | 2004-01-14 | 48           | 0.0035     | 1E-04       | NA    |
| Berger Perdomo-GTM        | GTM     | 2004-01-14 | 2008-01-14 | 48           | 0.0392     | 8E-04       | NA    |
| Colom Caballeros-GTM      | GTM     | 2008-01-14 | 2012-01-14 | 48           | -0.001     | 0           | NA    |
| Perez Molina-GTM          | GTM     | 2012-01-14 | 2015-09-02 | 44           | -0.0617    | -0.0014     | NA    |
| Hoyte-GUY                 | GUY     | 1985-08-06 | 1992-10-09 | 34           | -0.0199    | -6E-04      | Left  |
| Jagan Cheddi-GUY          | GUY     | 1992-10-09 | 1997-03-06 | 53           | 0.0065     | 1E-04       | NA    |
| Samuel Hinds-GUY          | GUY     | 1997-03-06 | 1997-12-19 | 9            | NA         | NA          | NA    |
| Janet Jagan-GUY           | GUY     | 1997-12-19 | 1999-08-11 | 20           | -0.0132    | -7E-04      | NA    |
| Bharrat Jagdeo-GUY        | GUY     | 1999-08-11 | 2011-12-03 | 148          | 0.1153     | 8E-04       | NA    |
| Ramotar-GUY               | GUY     | 2011-12-03 | 2015-05-16 | 41           | 0.1867     | 0.0046      | NA    |
| David Granger-GUY         | GUY     | 2015-05-16 | 2015-12-31 | 7            | NA         | NA          | Right |
| Azcona Hoyo-HND           | HND     | 1986-01-27 | 1990-01-27 | 1            | NA         | NA          | Left  |
| Callejas-HND              | HND     | 1990-01-27 | 1994-01-27 | 48           | NA         | NA          | NA    |
| Reina-HND                 | HND     | 1994-01-27 | 1998-01-27 | 48           | NA         | NA          | NA    |
| Flores Facusse-HND        | HND     | 1998-01-27 | 2002-01-27 | 48           | 0.0174     | 4E-04       | NA    |
| Ricardo Maduro-HND        | HND     | 2002-01-27 | 2006-01-27 | 48           | -0.0322    | -7E-04      | NA    |
| Zelaya-HND                | HND     | 2006-01-27 | 2009-06-28 | 41           | -0.0588    | -0.0014     | NA    |
| Micheletti-HND            | HND     | 2009-06-28 | 2010-01-27 | 7            | NA         | NA          | NA    |
| Lobo-HND                  | HND     | 2010-01-27 | 2014-01-27 | 48           | 0.089      | 0.0019      | NA    |
| Hernandez-HND             | HND     | 2014-01-27 | 2015-12-31 | 23           | NA         | NA          | Right |
| Tudjman-HRV               | HRV     | 1990-05-30 | 1999-11-26 | 115          | NA         | NA          | NA    |
| Pavletic-HRV              | HRV     | 1999-11-26 | 2000-02-02 | 3            | NA         | NA          | NA    |
| Mesic-HRV                 | HRV     | 2000-02-18 | 2010-02-18 | 120          | 0.2467     | 0.0021      | NA    |
| Josipovic-HRV             | HRV     | 2010-02-18 | 2015-02-18 | 60           | 0.168      | 0.0028      | NA    |
| K. Grabar-Kitarovic-HRV   | HRV     | 2015-02-19 | 2015-12-31 | 10           | NA         | NA          | Right |
| Avril-HTI                 | HTI     | 1988-09-17 | 1990-03-10 | 3            | NA         | NA          | Left  |
| Pascal-Troillet-HTI       | HTI     | 1990-03-13 | 1991-02-07 | 11           | NA         | NA          | NA    |
| Aristide-HTI              | HTI     | 1991-02-07 | 1991-09-30 | 7            | NA         | NA          | NA    |
| Cedras-HTI                | HTI     | 1991-09-30 | 1994-10-14 | 37           | NA         | NA          | NA    |
| Aristide-HTI              | HTI     | 1994-10-15 | 1996-02-07 | 16           | NA         | NA          | NA    |
| Preval-HTI                | HTI     | 1996-02-07 | 2001-02-07 | 60           | -0.1469    | -0.0024     | NA    |
| Aristide-HTI              | HTI     | 2001-02-08 | 2004-02-29 | 36           | -0.0021    | -1E-04      | NA    |
| Boniface Alexandre-HTI    | HTI     | 2004-02-29 | 2006-05-14 | 27           | 0.0638     | 0.0024      | NA    |
| Preval-HTI                | HTI     | 2006-05-14 | 2011-05-14 | 60           | -0.4033    | -0.0067     | NA    |
| Martelly-HTI              | HTI     | 2011-05-14 | 2014-12-31 | 43           | -0.038     | -9E-04      | NA    |
| Szuros-HUN                | HUN     | 1989-10-18 | 1990-05-02 | 5            | NA         | NA          | Left  |
| Antall-HUN                | HUN     | 1990-05-03 | 1993-12-12 | 43           | -0.0776    | -0.0018     | NA    |
| Boross-HUN                | HUN     | 1993-12-12 | 1994-07-15 | 7            | NA         | NA          | NA    |
| Horn-HUN                  | HUN     | 1994-07-15 | 1998-07-06 | 48           | -0.1494    | -0.0031     | NA    |
| Orban-HUN                 | HUN     | 1998-07-06 | 2002-05-27 | 46           | -0.0991    | -0.0022     | NA    |
| Peter Medgyessy-HUN       | HUN     | 2002-05-27 | 2004-09-29 | 28           | 0.123      | 0.0044      | NA    |
| Ferenc Gyurcsany-HUN      | HUN     | 2004-09-29 | 2009-04-14 | 55           | -0.3708    | -0.0067     | NA    |
| Bajnai-HUN                | HUN     | 2009-04-14 | 2010-05-29 | 13           | 0.0942     | 0.0072      | NA    |
| Orban-HUN                 | HUN     | 2010-05-29 | 2015-12-31 | 67           | -0.2773    | -0.0041     | Right |
| Suharto-IDN               | IDN     | 1966-03-12 | 1998-05-21 | 101          | -0.1629    | -0.0016     | Left  |
| Habibie-IDN               | IDN     | 1998-05-21 | 1999-10-20 | 17           | 8E-04      | 0           | NA    |
| Wahid-IDN                 | IDN     | 1999-10-20 | 2001-07-23 | 21           | -0.0953    | -0.0045     | NA    |
| Megawati Sukarnoputri-IDN | IDN     | 2001-07-24 | 2004-10-20 | 39           | -0.1111    | -0.0028     | NA    |



| Leader ID             | Country | From       | To         | Spell Length | Change Tax | Rate Change | Cens  |
|-----------------------|---------|------------|------------|--------------|------------|-------------|-------|
| Bambang Yudhoyono-IDN | IDN     | 2004-10-20 | 2014-10-20 | 120          | -0.0328    | -3E-04      | NA    |
| Joko Widodo-IDN       | IDN     | 2014-10-20 | 2015-12-31 | 14           | -0.017     | -0.0012     | Right |
| Pratap Singh-IND      | IND     | 1989-12-02 | 1990-11-10 | 11           | NA         | NA          | NA    |
| Shekhar-IND           | IND     | 1990-11-10 | 1991-06-21 | 7            | NA         | NA          | NA    |
| Rao-IND               | IND     | 1991-06-21 | 1996-05-16 | 59           | -0.1515    | -0.0026     | NA    |
| Vajpayee-IND          | IND     | 1996-05-16 | 1996-06-01 | 1            | NA         | NA          | NA    |
| Gowda-IND             | IND     | 1996-06-01 | 1997-04-21 | 10           | NA         | NA          | NA    |
| Gujral-IND            | IND     | 1997-04-21 | 1998-03-19 | 11           | NA         | NA          | NA    |
| Vajpayee-IND          | IND     | 1998-03-19 | 2004-05-22 | 74           | -0.1361    | -0.0018     | NA    |
| Manmohan Singh-IND    | IND     | 2004-05-22 | 2014-05-26 | 120          | -0.1062    | -9E-04      | NA    |
| Narendra Modi-IND     | IND     | 2014-05-29 | 2015-12-31 | 19           | 0.0981     | 0.0052      | Right |
| Haughey-IRL           | IRL     | 1987-03-10 | 1992-02-11 | 26           | -0.0408    | -0.0016     | Left  |
| Reynolds-IRL          | IRL     | 1992-02-11 | 1994-12-15 | 34           | -0.5551    | -0.0163     | NA    |
| Bruton-IRL            | IRL     | 1994-12-15 | 1997-06-26 | 30           | -0.1739    | -0.0058     | NA    |
| Ahern-IRL             | IRL     | 1997-06-26 | 2008-05-07 | 131          | 0.3782     | 0.0029      | NA    |
| B. Cowen-IRL          | IRL     | 2008-05-07 | 2011-03-09 | 34           | 0.0974     | 0.0029      | NA    |
| E. Kenny-IRL          | IRL     | 2011-03-09 | 2015-12-31 | 57           | -0.3177    | -0.0056     | Right |
| Rafsanjani-IRN        | IRN     | 1989-08-17 | 1997-08-03 | 92           | -0.5885    | -0.0064     | Left  |
| Khatami-IRN           | IRN     | 1997-08-03 | 2005-08-03 | 96           | -0.2821    | -0.0029     | NA    |
| Ahmadinejad-IRN       | IRN     | 2005-08-03 | 2013-08-03 | 96           | -0.0101    | -1E-04      | NA    |
| Rouhani-IRN           | IRN     | 2013-08-03 | 2015-12-31 | 28           | 0.5207     | 0.0186      | Right |
| Saddam Hussein-IRQ    | IRQ     | 1979-07-16 | 2003-04-09 | 160          | -0.0196    | -1E-04      | Left  |
| Jay Garner-IRQ        | IRQ     | 2003-04-21 | 2003-05-12 | 1            | NA         | NA          | NA    |
| Paul Bremer-IRQ       | IRQ     | 2003-05-12 | 2004-06-28 | 13           | -0.0938    | -0.0072     | NA    |
| Iyad Allawi-IRQ       | IRQ     | 2004-06-28 | 2005-05-03 | 11           | NA         | NA          | NA    |
| al-Jaafari-IRQ        | IRQ     | 2005-05-03 | 2006-05-20 | 12           | 0.1315     | 0.011       | NA    |
| al-Maliki-IRQ         | IRQ     | 2006-05-20 | 2014-09-08 | 100          | 0.1657     | 0.0017      | NA    |
| al-Abadi-IRQ          | IRQ     | 2014-09-08 | 2015-12-31 | 15           | 0.1326     | 0.0088      | Right |
| Shamir-ISR            | ISR     | 1986-10-20 | 1992-07-12 | 31           | 0.1324     | 0.0043      | Left  |
| Rabin-ISR             | ISR     | 1992-07-12 | 1995-11-04 | 40           | -0.0071    | -2E-04      | NA    |
| Peres-ISR             | ISR     | 1995-11-04 | 1996-06-18 | 7            | NA         | NA          | NA    |
| Netanyahu-ISR         | ISR     | 1996-06-18 | 1999-07-06 | 37           | -0.0326    | -9E-04      | NA    |
| Barak-ISR             | ISR     | 1999-07-06 | 2001-03-07 | 20           | -0.0101    | -5E-04      | NA    |
| Ariel Sharon-ISR      | ISR     | 2001-03-08 | 2006-01-04 | 58           | -0.0606    | -0.001      | NA    |
| Olmert-ISR            | ISR     | 2006-01-04 | 2009-03-31 | 38           | 0.1893     | 0.005       | NA    |
| Netanyahu-ISR         | ISR     | 2009-03-31 | 2015-12-31 | 81           | 0.0463     | 6E-04       | Right |
| Andreotti-ITA         | ITA     | 1989-07-23 | 1992-06-28 | 30           | NA         | NA          | Left  |
| Amato-ITA             | ITA     | 1992-06-28 | 1993-04-29 | 10           | NA         | NA          | NA    |
| Ciampi-ITA            | ITA     | 1993-04-29 | 1994-05-11 | 13           | 0          | 0           | NA    |
| Berlusconi-ITA        | ITA     | 1994-05-11 | 1995-01-17 | 8            | NA         | NA          | NA    |
| Dini-ITA              | ITA     | 1995-01-17 | 1996-05-18 | 16           | 0.1269     | 0.0079      | NA    |
| Prodi-ITA             | ITA     | 1996-05-18 | 1998-10-21 | 29           | -0.2611    | -0.009      | NA    |
| D'Alema-ITA           | ITA     | 1998-10-21 | 2000-04-26 | 18           | -0.2028    | -0.0113     | NA    |
| Amato-ITA             | ITA     | 2000-04-26 | 2001-06-11 | 14           | -0.1083    | -0.0077     | NA    |
| Berlusconi-ITA        | ITA     | 2001-06-11 | 2006-05-17 | 59           | 0.2992     | 0.0051      | NA    |
| Prodi-ITA             | ITA     | 2006-05-17 | 2008-05-08 | 24           | 0.3135     | 0.0131      | NA    |
| Berlusconi-ITA        | ITA     | 2008-05-08 | 2011-11-16 | 42           | -0.0232    | -6E-04      | NA    |
| Monti-ITA             | ITA     | 2011-11-16 | 2013-04-28 | 17           | 0.0309     | 0.0018      | NA    |
| Letta-ITA             | ITA     | 2013-04-28 | 2014-02-22 | 10           | NA         | NA          | NA    |
| Renzi-ITA             | ITA     | 2014-02-22 | 2015-12-31 | 22           | -0.3667    | -0.0167     | Right |

| Leader ID                   | Country | From       | To         | Spell Length | Change Tax | Rate Change | Cens  |
|-----------------------------|---------|------------|------------|--------------|------------|-------------|-------|
| Manley-JAM                  | JAM     | 1989-02-10 | 1992-03-30 | 27           | NA         | NA          | Left  |
| Patterson-JAM               | JAM     | 1992-03-30 | 2006-03-30 | 168          | 0.0409     | 2E-04       | NA    |
| Simpson-Miller-JAM          | JAM     | 2006-03-30 | 2007-09-11 | 18           | -0.0337    | -0.0019     | NA    |
| Golding-JAM                 | JAM     | 2007-09-11 | 2011-10-23 | 49           | 0.2146     | 0.0044      | NA    |
| Holness-JAM                 | JAM     | 2011-10-23 | 2012-01-05 | 3            | NA         | NA          | NA    |
| Simpson-Miller-JAM          | JAM     | 2012-01-05 | 2015-12-31 | 47           | 0.148      | 0.0031      | Right |
| H. Ibn T. El-Hashim-JOR     | JOR     | 1952-08-11 | 1999-02-07 | 110          | 0.0065     | 1E-04       | Left  |
| A. Ibn H. El-Hashimi-JOR    | JOR     | 1999-02-07 | 2015-12-31 | 202          | 0.0064     | 0           | Right |
| Kaifu-JPN                   | JPN     | 1989-08-09 | 1991-11-06 | 23           | -0.0121    | -5E-04      | Left  |
| Miyazawa-JPN                | JPN     | 1991-11-06 | 1993-08-09 | 21           | 0.2302     | 0.011       | NA    |
| Hosokawa-JPN                | JPN     | 1993-08-09 | 1994-04-25 | 8            | NA         | NA          | NA    |
| Hata-JPN                    | JPN     | 1994-04-25 | 1994-06-29 | 2            | NA         | NA          | NA    |
| Murayama-JPN                | JPN     | 1994-06-29 | 1996-01-11 | 19           | -0.2431    | -0.0128     | NA    |
| Hashimoto-JPN               | JPN     | 1996-01-11 | 1998-07-30 | 30           | -0.5324    | -0.0177     | NA    |
| Obuchi-JPN                  | JPN     | 1998-07-30 | 2000-04-02 | 21           | 0.0905     | 0.0043      | NA    |
| Yoshiro Mori-JPN            | JPN     | 2000-04-05 | 2001-04-26 | 12           | -0.0632    | -0.0053     | NA    |
| Junichiro Koizumi-JPN       | JPN     | 2001-04-26 | 2006-09-26 | 65           | -0.1483    | -0.0023     | NA    |
| Shinzo Abe-JPN              | JPN     | 2006-09-26 | 2007-09-26 | 12           | -0.1314    | -0.011      | NA    |
| Yasuo Fukuda-JPN            | JPN     | 2007-09-26 | 2008-09-24 | 12           | 0.0601     | 0.005       | NA    |
| Taro Aso-JPN                | JPN     | 2008-09-24 | 2009-09-16 | 12           | -0.2573    | -0.0214     | NA    |
| Hatoyama Yukio-JPN          | JPN     | 2009-09-16 | 2010-06-08 | 9            | NA         | NA          | NA    |
| Naoto Kan-JPN               | JPN     | 2010-06-08 | 2011-09-02 | 15           | 0.0627     | 0.0042      | NA    |
| Yoshihiko Noda-JPN          | JPN     | 2011-09-02 | 2012-12-26 | 15           | -0.1015    | -0.0068     | NA    |
| Shinzo Abe-JPN              | JPN     | 2012-12-26 | 2015-12-31 | 36           | -0.1358    | -0.0038     | Right |
| Nazarbayev-KAZ              | KAZ     | 1990-04-24 | 2015-12-31 | 309          | 0.0939     | 3E-04       | Right |
| Moi-KEN                     | KEN     | 1978-08-22 | 2002-12-30 | 156          | -0.0337    | -2E-04      | Left  |
| Mwai Kibaki-KEN             | KEN     | 2002-12-31 | 2013-04-09 | 124          | -0.1733    | -0.0014     | NA    |
| Uhuru Kenyatta-KEN          | KEN     | 2013-04-09 | 2015-12-31 | 32           | 0.0539     | 0.0017      | Right |
| Akayev-KGZ                  | KGZ     | 1990-10-27 | 2005-03-25 | 174          | 0.0366     | 2E-04       | NA    |
| Bakiyev-KGZ                 | KGZ     | 2005-03-25 | 2010-04-07 | 61           | 0.0224     | 4E-04       | NA    |
| Otunbayeva-KGZ              | KGZ     | 2010-04-07 | 2011-12-01 | 20           | -0.1746    | -0.0087     | NA    |
| Atambayev-KGZ               | KGZ     | 2011-12-01 | 2015-12-31 | 48           | 0.1506     | 0.0031      | Right |
| Hun Sen-KHM                 | KHM     | 1985-01-14 | 1993-09-21 | 45           | NA         | NA          | Left  |
| Ranariddh-KHM               | KHM     | 1993-09-21 | 1997-07-06 | 46           | 0.2704     | 0.0059      | NA    |
| Hun Sen-KHM                 | KHM     | 1997-07-06 | 2015-12-31 | 221          | 0.174      | 8E-04       | Right |
| Roh Tae Woo-KOR             | KOR     | 1988-02-25 | 1993-02-25 | 38           | 0.3192     | 0.0084      | Left  |
| Kim Young Sam-KOR           | KOR     | 1993-02-25 | 1998-02-25 | 60           | -0.1187    | -0.002      | NA    |
| Kim Dae Jung-KOR            | KOR     | 1998-02-25 | 2003-02-25 | 60           | 0.2251     | 0.0038      | NA    |
| Roh Moo Hyun-KOR            | KOR     | 2003-02-25 | 2008-02-25 | 60           | 0.1999     | 0.0033      | NA    |
| Lee Myung Bak-KOR           | KOR     | 2008-02-25 | 2013-02-25 | 60           | -0.0027    | 0           | NA    |
| Park Geun-hye-KOR           | KOR     | 2013-02-25 | 2015-12-31 | 34           | -0.1029    | -0.003      | Right |
| Jabir As-Sabah-KWT          | KWT     | 1978-01-01 | 1990-08-02 | 8            | NA         | NA          | Left  |
| Saddam Hussein-KWT          | KWT     | 1990-08-02 | 1991-04-20 | 8            | NA         | NA          | NA    |
| Jabir As-Sabah-KWT          | KWT     | 1991-04-20 | 2006-01-15 | 177          | -0.231     | -0.0013     | NA    |
| Sabah Al Ahmad Al Sabah-KWT | KWT     | 2006-01-29 | 2015-12-31 | 119          | 0.1807     | 0.0015      | Right |
| Phomivan-LAO                | LAO     | 1975-12-02 | 1992-11-25 | 35           | NA         | NA          | Left  |
| Phounsavanh-LAO             | LAO     | 1992-11-25 | 1998-02-24 | 63           | NA         | NA          | NA    |
| Siphandon-LAO               | LAO     | 1998-02-24 | 2006-06-08 | 100          | 0.1872     | 0.0019      | NA    |
| Sayasone-LAO                | LAO     | 2006-06-08 | 2015-12-31 | 114          | 0.2718     | 0.0024      | Right |
| Elias Hrawi-LBN             | LBN     | 1989-11-23 | 1998-11-24 | 107          | NA         | NA          | Left  |

| Leader ID                | Country | From       | To         | Spell Length | Change Tax | Rate Change | Cens  |
|--------------------------|---------|------------|------------|--------------|------------|-------------|-------|
| Emile Lahoud-LBN         | LBN     | 1998-11-24 | 2007-11-23 | 108          | -0.2142    | -0.002      | NA    |
| Siniora-LBN              | LBN     | 2007-11-23 | 2008-05-25 | 6            | NA         | NA          | NA    |
| Suleiman-LBN             | LBN     | 2008-05-25 | 2014-05-24 | 72           | 0.4605     | 0.0064      | NA    |
| Salam-LBN                | LBN     | 2014-05-24 | 2015-12-31 | 19           | -0.0375    | -0.002      | Right |
| Doe-LBR                  | LBR     | 1980-04-12 | 1990-09-09 | 9            | NA         | NA          | Left  |
| Sawyer-LBR               | LBR     | 1990-11-22 | 1994-03-07 | 41           | NA         | NA          | NA    |
| Kpormapkor-LBR           | LBR     | 1994-03-07 | 1995-09-01 | 18           | NA         | NA          | NA    |
| Sankawulo-LBR            | LBR     | 1995-09-01 | 1996-09-03 | 12           | NA         | NA          | NA    |
| Ruth Perry-LBR           | LBR     | 1996-09-03 | 1997-08-02 | 11           | NA         | NA          | NA    |
| Taylor-LBR               | LBR     | 1997-08-02 | 2003-08-11 | 72           | NA         | NA          | NA    |
| Moses Zeh Blah-LBR       | LBR     | 2003-08-11 | 2003-10-14 | 2            | NA         | NA          | NA    |
| Bryant-LBR               | LBR     | 2003-10-14 | 2006-01-16 | 27           | NA         | NA          | NA    |
| Johnson Sirleaf-LBR      | LBR     | 2006-01-16 | 2015-12-31 | 119          | -0.0268    | -2E-04      | Right |
| Qaddafi-LBY              | LBY     | 1969-09-01 | 2011-08-23 | 260          | -0.8654    | -0.0033     | Left  |
| Mustafa Jilil-LBY        | LBY     | 2011-08-23 | 2012-08-08 | 12           | -0.0131    | -0.0011     | NA    |
| Mohammed Magariaf-LBY    | LBY     | 2012-08-09 | 2013-05-28 | 9            | NA         | NA          | NA    |
| Giuma Ahmed Atigha-LBY   | LBY     | 2013-05-28 | 2013-06-25 | 1            | NA         | NA          | NA    |
| Nouri Abusahmain-LBY     | LBY     | 2013-06-25 | 2014-08-04 | 14           | -0.0173    | -0.0012     | NA    |
| Akila Saleh Issa-LBY     | LBY     | 2014-08-05 | 2015-12-31 | 16           | 0.2381     | 0.0149      | Right |
| Premadasa-LKA            | LKA     | 1989-01-02 | 1993-05-01 | 41           | 0.2599     | 0.0063      | Left  |
| Wijetunge-LKA            | LKA     | 1993-05-01 | 1994-11-12 | 18           | 0.027      | 0.0015      | NA    |
| Kumaratunga-LKA          | LKA     | 1994-11-12 | 2005-11-19 | 132          | -0.7168    | -0.0054     | NA    |
| Rajapakse-LKA            | LKA     | 2005-11-19 | 2015-01-09 | 110          | 0.2019     | 0.0018      | NA    |
| Maithripala Sirisena-LKA | LKA     | 2015-01-09 | 2015-12-31 | 11           | NA         | NA          | Right |
| Lekhanya-LSO             | LSO     | 1986-01-24 | 1991-05-02 | 17           | NA         | NA          | Left  |
| Ramaema-LSO              | LSO     | 1991-05-02 | 1993-04-02 | 23           | NA         | NA          | NA    |
| Mokhehle-LSO             | LSO     | 1993-04-02 | 1994-08-17 | 16           | NA         | NA          | NA    |
| Letsie III-LSO           | LSO     | 1994-08-17 | 1994-09-14 | 1            | NA         | NA          | NA    |
| Mokhehle-LSO             | LSO     | 1994-09-14 | 1998-05-29 | 44           | NA         | NA          | NA    |
| Mosisili-LSO             | LSO     | 1998-05-29 | 2012-06-08 | 169          | 0.124      | 7E-04       | NA    |
| Thabane-LSO              | LSO     | 2012-06-08 | 2015-03-17 | 33           | 0.1215     | 0.0037      | NA    |
| Pakalitha Mosisili-LSO   | LSO     | 2015-03-17 | 2015-12-31 | 9            | NA         | NA          | Right |
| Landsbergis-LTU          | LTU     | 1990-03-11 | 1992-11-25 | 33           | NA         | NA          | NA    |
| Brazauskas-LTU           | LTU     | 1992-11-25 | 1998-02-25 | 63           | NA         | NA          | NA    |
| Adamkus-LTU              | LTU     | 1998-02-26 | 2003-02-25 | 60           | 0.0627     | 0.001       | NA    |
| Paksas-LTU               | LTU     | 2003-02-26 | 2004-04-06 | 14           | -0.0064    | -5E-04      | NA    |
| Paulauskas-LTU           | LTU     | 2004-04-06 | 2004-07-12 | 3            | NA         | NA          | NA    |
| Adamkus-LTU              | LTU     | 2004-07-12 | 2009-07-12 | 60           | 0.3579     | 0.006       | NA    |
| Grybauskaitė-LTU         | LTU     | 2009-07-12 | 2015-12-31 | 77           | -0.2895    | -0.0038     | Right |
| Santer-LUX               | LUX     | 1984-07-20 | 1995-01-20 | 61           | 0.1911     | 0.0031      | Left  |
| Juncker-LUX              | LUX     | 1995-01-20 | 2013-12-04 | 227          | -4E-04     | 0           | NA    |
| Xavier Bettel-LUX        | LUX     | 2013-12-04 | 2015-12-31 | 24           | -0.2076    | -0.0087     | Right |
| Godmanis-LVA             | LVA     | 1990-05-03 | 1993-08-03 | 40           | NA         | NA          | NA    |
| Birkavs-LVA              | LVA     | 1993-08-03 | 1994-09-19 | 13           | NA         | NA          | NA    |
| Gailis-LVA               | LVA     | 1994-09-19 | 1995-12-21 | 15           | NA         | NA          | NA    |
| Skele-LVA                | LVA     | 1995-12-21 | 1997-08-07 | 20           | NA         | NA          | NA    |
| Krasts-LVA               | LVA     | 1997-08-07 | 1998-11-26 | 15           | NA         | NA          | NA    |
| Kristopans-LVA           | LVA     | 1998-11-26 | 1999-07-16 | 8            | NA         | NA          | NA    |
| Skele-LVA                | LVA     | 1999-07-16 | 2000-05-05 | 10           | NA         | NA          | NA    |
| Berzins-LVA              | LVA     | 2000-05-05 | 2002-11-07 | 30           | -0.0202    | -7E-04      | NA    |

| Leader ID                  | Country | From       | To         | Spell Length | Change Tax | Rate Change | Cens  |
|----------------------------|---------|------------|------------|--------------|------------|-------------|-------|
| Repse-LVA                  | LVA     | 2002-11-07 | 2004-03-09 | 16           | 0.1034     | 0.0065      | NA    |
| Indulis Emsis-LVA          | LVA     | 2004-03-09 | 2004-12-02 | 9            | NA         | NA          | NA    |
| Aigars Kalvitis-LVA        | LVA     | 2004-12-02 | 2007-12-20 | 36           | 0.1203     | 0.0033      | NA    |
| Godmanis-LVA               | LVA     | 2007-12-20 | 2009-03-12 | 15           | -0.2169    | -0.0145     | NA    |
| Dombrovskis-LVA            | LVA     | 2009-03-12 | 2014-01-22 | 58           | 0.0897     | 0.0015      | NA    |
| Lamdota Straujuma-LVA      | LVA     | 2014-01-22 | 2014-12-31 | 11           | NA         | NA          | NA    |
| Hassan II-MAR              | MAR     | 1961-02-26 | 1999-07-23 | 115          | -0.1827    | -0.0016     | Left  |
| Muhammad VI-MAR            | MAR     | 1999-07-23 | 2015-12-31 | 197          | -0.2309    | -0.0012     | Right |
| Snegur-MDA                 | MDA     | 1990-09-03 | 1997-01-15 | 77           | NA         | NA          | NA    |
| Lucinschi-MDA              | MDA     | 1997-01-15 | 2001-04-07 | 51           | -0.0828    | -0.0016     | NA    |
| Tarlev-MDA                 | MDA     | 2001-04-07 | 2008-03-31 | 83           | 0.3802     | 0.0046      | NA    |
| Greceanii-MDA              | MDA     | 2008-03-31 | 2009-09-14 | 18           | -0.058     | -0.0032     | NA    |
| Vlad Filat-MDA             | MDA     | 2009-09-25 | 2013-04-25 | 43           | 0.1268     | 0.0029      | NA    |
| Iurie Leanca-MDA           | MDA     | 2013-04-25 | 2015-02-18 | 22           | -0.0387    | -0.0018     | NA    |
| Chiril Gaburici-MDA        | MDA     | 2015-02-18 | 2015-06-22 | 4            | NA         | NA          | NA    |
| Natalia Gherman-MDA        | MDA     | 2015-06-22 | 2015-07-30 | 1            | NA         | NA          | NA    |
| Valeriu Strelet-MDA        | MDA     | 2015-07-30 | 2015-10-30 | 3            | NA         | NA          | NA    |
| Ratsiraka-MDG              | MDG     | 1975-06-15 | 1993-03-27 | 39           | NA         | NA          | Left  |
| Zafy-MDG                   | MDG     | 1993-03-27 | 1996-09-05 | 42           | -0.0219    | -5E-04      | NA    |
| Ratsirahonana-MDG          | MDG     | 1996-09-05 | 1997-02-09 | 5            | NA         | NA          | NA    |
| Ratsiraka-MDG              | MDG     | 1997-02-09 | 2002-07-06 | 65           | 0.3586     | 0.0055      | NA    |
| Marc Ravalomanana-MDG      | MDG     | 2002-07-06 | 2009-03-17 | 80           | 0.1665     | 0.0021      | NA    |
| Rajoelina-MDG              | MDG     | 2009-03-17 | 2014-01-25 | 58           | -0.131     | -0.0023     | NA    |
| Rajaonarimampianina-MDG    | MDG     | 2014-01-25 | 2015-12-31 | 23           | -0.0135    | -6E-04      | Right |
| Salinas-MEX                | MEX     | 1988-12-01 | 1994-11-30 | 59           | NA         | NA          | Left  |
| Zedillo-MEX                | MEX     | 1994-12-01 | 2000-11-30 | 72           | NA         | NA          | NA    |
| Vicente Fox Quesada-MEX    | MEX     | 2000-12-01 | 2006-11-30 | 72           | -0.3358    | -0.0047     | NA    |
| Calderon-MEX               | MEX     | 2006-12-01 | 2012-12-01 | 73           | -0.1646    | -0.0023     | NA    |
| Enrique Pena Nieto-MEX     | MEX     | 2012-12-01 | 2015-12-31 | 36           | 0.3201     | 0.0089      | Right |
| Nikola Kijusev-MKD         | MKD     | 1991-01-27 | 1992-08-17 | 20           | NA         | NA          | NA    |
| Crvenkovski-MKD            | MKD     | 1992-08-17 | 1998-11-30 | 75           | NA         | NA          | NA    |
| Georgievski-MKD            | MKD     | 1998-11-30 | 2002-11-01 | 48           | NA         | NA          | NA    |
| Crvenkovski-MKD            | MKD     | 2002-11-01 | 2004-05-12 | 18           | NA         | NA          | NA    |
| Radmila Sekerinska-MKD     | MKD     | 2004-05-12 | 2004-06-02 | 1            | NA         | NA          | NA    |
| Hari Kostov-MKD            | MKD     | 2004-06-02 | 2004-11-18 | 5            | NA         | NA          | NA    |
| Radmila Sekerinska-MKD     | MKD     | 2004-11-18 | 2004-12-17 | 1            | NA         | NA          | NA    |
| Vlado Buckovski-MKD        | MKD     | 2004-12-17 | 2006-08-27 | 20           | 0          | 0           | NA    |
| Gruevski-MKD               | MKD     | 2006-08-27 | 2014-12-31 | 100          | -0.0595    | -6E-04      | NA    |
| Traore-MLI                 | MLI     | 1968-11-19 | 1991-03-26 | 15           | NA         | NA          | Left  |
| Amadou Toure-MLI           | MLI     | 1991-03-26 | 1992-06-06 | 15           | NA         | NA          | NA    |
| Konare-MLI                 | MLI     | 1992-06-06 | 2002-06-08 | 120          | -0.0025    | 0           | NA    |
| Amadou Toure-MLI           | MLI     | 2002-06-09 | 2012-03-22 | 117          | 0.0483     | 4E-04       | NA    |
| Amadou Sanogo-MLI          | MLI     | 2012-03-22 | 2012-04-12 | 1            | NA         | NA          | NA    |
| Dioncounda Traore-MLI      | MLI     | 2012-04-12 | 2013-09-04 | 17           | 0.131      | 0.0077      | NA    |
| Ibrahim Boubacar Keita-MLI | MLI     | 2013-09-04 | 2015-12-31 | 27           | 0.0493     | 0.0018      | Right |
| Adami-MLT                  | MLT     | 1987-05-12 | 1996-10-28 | 82           | NA         | NA          | Left  |
| Sant-MLT                   | MLT     | 1996-10-28 | 1998-09-06 | 23           | NA         | NA          | NA    |
| Adami-MLT                  | MLT     | 1998-09-06 | 2004-03-23 | 66           | NA         | NA          | NA    |
| Gonzi-MLT                  | MLT     | 2004-03-23 | 2013-03-11 | 108          | 0.3921     | 0.0036      | NA    |
| Muscat-MLT                 | MLT     | 2013-03-11 | 2015-12-31 | 33           | -0.1297    | -0.0039     | Right |

| Leader ID                 | Country | From       | To         | Spell Length | Change Tax | Rate Change | Cens  |
|---------------------------|---------|------------|------------|--------------|------------|-------------|-------|
| Saw Maung-MMR             | MMR     | 1988-09-18 | 1992-04-23 | 28           | NA         | NA          | Left  |
| Than Shwe-MMR             | MMR     | 1992-04-23 | 2011-03-30 | 227          | NA         | NA          | NA    |
| Thein Sein-MMR            | MMR     | 2011-03-30 | 2015-12-31 | 57           | -0.0744    | -0.0013     | Right |
| Batmonh-MNG               | MNG     | 1984-08-23 | 1990-03-12 | 3            | NA         | NA          | Left  |
| Ochirbat-MNG              | MNG     | 1990-03-12 | 1997-06-20 | 87           | -0.0269    | -3E-04      | NA    |
| Bagabandi-MNG             | MNG     | 1997-06-20 | 2005-06-24 | 96           | 0.1124     | 0.0012      | NA    |
| Enkhbayar-MNG             | MNG     | 2005-06-24 | 2009-06-18 | 48           | 0.3262     | 0.0068      | NA    |
| Elbegdorj-MNG             | MNG     | 2009-06-18 | 2015-12-31 | 78           | 0.0173     | 2E-04       | Right |
| Chissano-MOZ              | MOZ     | 1986-11-06 | 2005-02-02 | 182          | 0.3397     | 0.0019      | Left  |
| Guebuza-MOZ               | MOZ     | 2005-02-02 | 2015-01-15 | 119          | 0.4829     | 0.0041      | NA    |
| Filipe Nyusi-MOZ          | MOZ     | 2015-01-15 | 2015-12-31 | 11           | NA         | NA          | Right |
| Sidi Ahmed Taya-MRT       | MRT     | 1984-12-12 | 2005-08-03 | 188          | -0.345     | -0.0018     | Left  |
| Ould Mohamed Vall-MRT     | MRT     | 2005-08-03 | 2007-04-19 | 20           | 0.1576     | 0.0079      | NA    |
| Ould Cheikh Abdellahi-MRT | MRT     | 2007-04-19 | 2008-08-06 | 16           | -0.1586    | -0.0099     | NA    |
| Ould Abdel Aziz-MRT       | MRT     | 2008-08-06 | 2009-04-15 | 8            | NA         | NA          | NA    |
| dit M'Bare-MRT            | MRT     | 2009-04-15 | 2009-08-05 | 4            | NA         | NA          | NA    |
| Ould Abdel Aziz-MRT       | MRT     | 2009-08-05 | 2015-12-31 | 76           | 0.3515     | 0.0046      | Right |
| Anerood Jugnauth-MUS      | MUS     | 1982-06-16 | 1995-12-22 | 72           | -0.1427    | -0.002      | Left  |
| Ramgoolam N.-MUS          | MUS     | 1995-12-22 | 2000-09-17 | 57           | -0.2201    | -0.0039     | NA    |
| Anerood Jugnauth-MUS      | MUS     | 2000-09-18 | 2003-09-30 | 36           | -0.0308    | -9E-04      | NA    |
| Paul Berenger-MUS         | MUS     | 2003-09-30 | 2005-07-05 | 22           | -0.095     | -0.0043     | NA    |
| Navin Ramgoolam-MUS       | MUS     | 2005-07-05 | 2014-12-17 | 113          | 0.5403     | 0.0048      | NA    |
| Anerood Jugnauth-MUS      | MUS     | 2014-12-17 | 2015-12-31 | 12           | -0.1028    | -0.0086     | Right |
| Banda-MWI                 | MWI     | 1964-07-06 | 1994-05-21 | 53           | NA         | NA          | Left  |
| Muluzi-MWI                | MWI     | 1994-05-21 | 2004-05-24 | 120          | -0.0693    | -6E-04      | NA    |
| Bingu wa Mutharika-MWI    | MWI     | 2004-05-24 | 2012-04-07 | 95           | 0.9308     | 0.0098      | NA    |
| Joyce Hilda Banda-MWI     | MWI     | 2012-04-07 | 2014-05-31 | 25           | 0.328      | 0.0131      | NA    |
| Peter Mutharika-MWI       | MWI     | 2014-05-31 | 2015-12-31 | 19           | -0.3208    | -0.0169     | Right |
| Mahatir Bin Mohammad-MYS  | MYS     | 1981-07-16 | 2003-10-31 | 166          | -0.2246    | -0.0014     | Left  |
| Ahmad Badawi-MYS          | MYS     | 2003-10-31 | 2009-04-03 | 66           | 0.0621     | 9E-04       | NA    |
| Najib Tun Razak-MYS       | MYS     | 2009-04-03 | 2015-12-31 | 80           | 0.1033     | 0.0013      | Right |
| Nujoma-NAM                | NAM     | 1990-03-21 | 2005-03-21 | 181          | -0.0285    | -2E-04      | NA    |
| Pohamba-NAM               | NAM     | 2005-03-21 | 2015-03-21 | 120          | 0.189      | 0.0016      | NA    |
| Hage Geingob-NAM          | NAM     | 2015-03-21 | 2015-12-31 | 9            | NA         | NA          | Right |
| Seibou-NER                | NER     | 1987-11-10 | 1993-04-16 | 40           | NA         | NA          | Left  |
| Ousmane-NER               | NER     | 1993-04-16 | 1996-01-27 | 33           | NA         | NA          | NA    |
| Mainassara-NER            | NER     | 1996-01-27 | 1999-04-11 | 39           | NA         | NA          | NA    |
| Wanke-NER                 | NER     | 1999-04-11 | 1999-12-22 | 8            | NA         | NA          | NA    |
| Mamadou Tandja-NER        | NER     | 1999-12-22 | 2010-02-08 | 122          | 0.3419     | 0.0028      | NA    |
| Djibo-NER                 | NER     | 2010-02-08 | 2011-04-07 | 14           | 0.1878     | 0.0134      | NA    |
| Issoufou-NER              | NER     | 2011-04-07 | 2015-12-31 | 56           | -0.0369    | -7E-04      | Right |
| Babangida-NGA             | NGA     | 1985-08-27 | 1993-08-26 | 44           | 0.1408     | 0.0032      | Left  |
| Shonekan-NGA              | NGA     | 1993-08-26 | 1993-11-17 | 3            | NA         | NA          | NA    |
| Abacha-NGA                | NGA     | 1993-11-17 | 1998-06-08 | 55           | -0.0832    | -0.0015     | NA    |
| Abubakar-NGA              | NGA     | 1998-06-09 | 1999-05-29 | 11           | NA         | NA          | NA    |
| Obasanjo-NGA              | NGA     | 1999-05-29 | 2007-05-29 | 96           | -0.0378    | -4E-04      | NA    |
| Yar'Adua-NGA              | NGA     | 2007-05-29 | 2010-02-09 | 33           | -0.1191    | -0.0036     | NA    |
| Goodluck Jonathan-NGA     | NGA     | 2010-02-09 | 2015-05-29 | 63           | 0.2004     | 0.0032      | NA    |
| Muhummadu Buhari-NGA      | NGA     | 2015-05-29 | 2015-12-31 | 7            | NA         | NA          | Right |
| Daniel Ortega-NIC         | NIC     | 1979-07-18 | 1990-04-25 | 4            | NA         | NA          | Left  |

| Leader ID                    | Country | From       | To         | Spell Length | Change Tax | Rate Change | Cens  |
|------------------------------|---------|------------|------------|--------------|------------|-------------|-------|
| Violeta Chamorro-NIC         | NIC     | 1990-04-25 | 1997-01-10 | 81           | -5.0813    | -0.0627     | NA    |
| Aleman-NIC                   | NIC     | 1997-01-10 | 2002-01-10 | 60           | -0.2704    | -0.0045     | NA    |
| Enrique Bolanos-NIC          | NIC     | 2002-01-11 | 2007-01-10 | 60           | 0.0257     | 4E-04       | NA    |
| Daniel Ortega-NIC            | NIC     | 2007-01-10 | 2015-12-31 | 107          | 0.0711     | 7E-04       | Right |
| Lubbers-NLD                  | NLD     | 1982-11-04 | 1994-08-22 | 56           | 0.0753     | 0.0013      | Left  |
| Kok-NLD                      | NLD     | 1994-08-22 | 2002-07-22 | 95           | -0.3478    | -0.0037     | NA    |
| Jan Peter Balkenende-NLD     | NLD     | 2002-07-22 | 2010-10-14 | 99           | 0.3707     | 0.0037      | NA    |
| M. Rutte-NLD                 | NLD     | 2010-10-14 | 2015-12-31 | 62           | -0.2632    | -0.0042     | Right |
| Syse-NOR                     | NOR     | 1989-10-16 | 1990-11-03 | 11           | NA         | NA          | Left  |
| Brundtland-NOR               | NOR     | 1990-11-03 | 1996-10-25 | 71           | -0.0179    | -3E-04      | NA    |
| Jagland-NOR                  | NOR     | 1996-10-25 | 1997-10-17 | 12           | -0.1136    | -0.0095     | NA    |
| Bondevik-NOR                 | NOR     | 1997-10-17 | 1998-08-30 | 10           | NA         | NA          | NA    |
| Lahnstein-NOR                | NOR     | 1998-08-30 | 1998-09-23 | 1            | NA         | NA          | NA    |
| Bondevik-NOR                 | NOR     | 1998-09-24 | 2000-03-17 | 18           | -0.0397    | -0.0022     | NA    |
| Stoltenberg-NOR              | NOR     | 2000-03-17 | 2001-10-19 | 19           | -0.2332    | -0.0123     | NA    |
| Bondevik-NOR                 | NOR     | 2001-10-19 | 2005-10-17 | 48           | 0.4194     | 0.0087      | NA    |
| Stoltenberg-NOR              | NOR     | 2005-10-17 | 2013-10-16 | 96           | 0.4628     | 0.0048      | NA    |
| Solberg-NOR                  | NOR     | 2013-10-16 | 2015-12-31 | 26           | -0.2946    | -0.0113     | Right |
| Birendra-NPL                 | NPL     | 1972-01-31 | 1990-11-09 | 11           | NA         | NA          | Left  |
| Krishna Prasad Bhattarai-NPL | NPL     | 1990-11-09 | 1991-05-26 | 6            | NA         | NA          | NA    |
| Girija Prasad Koirala-NPL    | NPL     | 1991-05-26 | 1994-11-30 | 42           | NA         | NA          | NA    |
| Man Mohan Adhikari-NPL       | NPL     | 1994-11-30 | 1995-09-12 | 10           | NA         | NA          | NA    |
| Sher Bahadur Deuba-NPL       | NPL     | 1995-09-12 | 1997-03-12 | 18           | -0.0325    | -0.0018     | NA    |
| Lokendra Bahadur Chand-NPL   | NPL     | 1997-03-12 | 1997-10-07 | 7            | NA         | NA          | NA    |
| Surya Bahadur Thapa-NPL      | NPL     | 1997-10-07 | 1998-04-15 | 6            | NA         | NA          | NA    |
| Girija Prasad Koirala-NPL    | NPL     | 1998-04-15 | 1999-05-31 | 13           | 0.0214     | 0.0016      | NA    |
| Krishna Prasad Bhattarai-NPL | NPL     | 1999-05-31 | 2000-03-22 | 10           | NA         | NA          | NA    |
| Girija Prasad Koirala-NPL    | NPL     | 2000-03-22 | 2001-07-26 | 16           | 0.0472     | 0.003       | NA    |
| Sher Bahdur Deuba-NPL        | NPL     | 2001-07-26 | 2002-10-04 | 15           | -0.0632    | -0.0042     | NA    |
| Lokendra Bahadur Chand-NPL   | NPL     | 2002-10-11 | 2003-06-05 | 8            | NA         | NA          | NA    |
| Surya Bahadur Thapa-NPL      | NPL     | 2003-06-05 | 2004-06-03 | 12           | -0.0604    | -0.005      | NA    |
| Sher Bahdur Deuba-NPL        | NPL     | 2004-06-03 | 2005-02-01 | 8            | NA         | NA          | NA    |
| Gyanendra-NPL                | NPL     | 2005-02-01 | 2006-04-30 | 14           | 0.0072     | 5E-04       | NA    |
| Girija Prasad Koirala-NPL    | NPL     | 2006-04-30 | 2008-08-18 | 28           | 0.132      | 0.0047      | NA    |
| Prachanda-NPL                | NPL     | 2008-08-18 | 2009-05-25 | 9            | NA         | NA          | NA    |
| Madhav Kumar Nepal-NPL       | NPL     | 2009-05-25 | 2011-02-06 | 21           | 0.0885     | 0.0042      | NA    |
| Nath Khanal-NPL              | NPL     | 2011-02-06 | 2011-08-29 | 6            | NA         | NA          | NA    |
| Bhattarai-NPL                | NPL     | 2011-08-29 | 2013-03-14 | 19           | 0.0514     | 0.0027      | NA    |
| Khil Raj Regmi-NPL           | NPL     | 2013-03-14 | 2014-02-11 | 11           | NA         | NA          | NA    |
| Sushil Koirala-NPL           | NPL     | 2014-02-11 | 2015-10-10 | 20           | -0.0456    | -0.0023     | NA    |
| Khadga Prasad Sharma Oli-NPL | NPL     | 2015-10-10 | 2015-12-31 | 2            | NA         | NA          | Right |
| Palmer-NZL                   | NZL     | 1989-08-08 | 1990-09-04 | 9            | NA         | NA          | Left  |
| Moore-NZL                    | NZL     | 1990-09-04 | 1990-10-27 | 1            | NA         | NA          | NA    |
| Bolger-NZL                   | NZL     | 1990-10-27 | 1997-12-08 | 86           | 0.0511     | 6E-04       | NA    |
| Jenny Shipley-NZL            | NZL     | 1997-12-08 | 1999-12-10 | 24           | -0.2039    | -0.0085     | NA    |
| Helen Clark-NZL              | NZL     | 1999-12-10 | 2008-11-19 | 107          | -0.008     | -1E-04      | NA    |
| John Key-NZL                 | NZL     | 2008-11-19 | 2015-12-31 | 85           | 0.3139     | 0.0037      | Right |
| Qabus Bin Said-OMN           | OMN     | 1970-07-23 | 2015-12-31 | 312          | -0.3334    | -0.0011     | Both  |
| Benazir Bhutto-PAK           | PAK     | 1988-12-02 | 1990-08-06 | 8            | NA         | NA          | Left  |

| Leader ID                   | Country | From       | To         | Spell Length | Change Tax | Rate Change | Cens  |
|-----------------------------|---------|------------|------------|--------------|------------|-------------|-------|
| Jatoi-PAK                   | PAK     | 1990-08-06 | 1990-11-06 | 3            | NA         | NA          | NA    |
| Sharif-PAK                  | PAK     | 1990-11-06 | 1993-04-18 | 29           | NA         | NA          | NA    |
| Mazari-PAK                  | PAK     | 1993-04-18 | 1993-05-26 | 1            | NA         | NA          | NA    |
| Sharif-PAK                  | PAK     | 1993-05-26 | 1993-07-18 | 2            | NA         | NA          | NA    |
| Qureshi-PAK                 | PAK     | 1993-07-19 | 1993-10-19 | 3            | NA         | NA          | NA    |
| Benazir Bhutto-PAK          | PAK     | 1993-10-19 | 1996-11-05 | 37           | NA         | NA          | NA    |
| Khalid-PAK                  | PAK     | 1996-11-05 | 1997-02-17 | 3            | NA         | NA          | NA    |
| Sharif-PAK                  | PAK     | 1997-02-17 | 1999-10-12 | 32           | NA         | NA          | NA    |
| Musharraf-PAK               | PAK     | 1999-10-14 | 2008-08-18 | 106          | -0.2581    | -0.0024     | NA    |
| Soomro-PAK                  | PAK     | 2008-08-18 | 2008-09-09 | 1            | NA         | NA          | NA    |
| Zardari-PAK                 | PAK     | 2008-09-09 | 2013-06-05 | 57           | -0.3406    | -0.006      | NA    |
| Nawaz Sharif-PAK            | PAK     | 2013-06-05 | 2015-12-31 | 30           | 0.0821     | 0.0027      | Right |
| Noriega-PAN                 | PAN     | 1983-08-15 | 1990-01-03 | 1            | NA         | NA          | Left  |
| Endara-PAN                  | PAN     | 1990-01-04 | 1994-09-01 | 56           | NA         | NA          | NA    |
| Balladares-PAN              | PAN     | 1994-09-01 | 1999-09-01 | 60           | -0.0085    | -1E-04      | NA    |
| Mireya Moscoso-PAN          | PAN     | 1999-09-01 | 2004-09-01 | 60           | -0.074     | -0.0012     | NA    |
| Martin Torrijos-PAN         | PAN     | 2004-09-01 | 2009-07-01 | 58           | 0.0106     | 2E-04       | NA    |
| Martinelli-PAN              | PAN     | 2009-07-01 | 2014-07-01 | 60           | 0.0768     | 0.0013      | NA    |
| Varela Rodriguez-PAN        | PAN     | 2014-07-01 | 2015-12-31 | 17           | 0.0228     | 0.0013      | Right |
| Garcia Perez-PER            | PER     | 1985-07-28 | 1990-07-28 | 7            | NA         | NA          | Left  |
| Fujimori-PER                | PER     | 1990-07-28 | 2000-11-22 | 124          | 0.0135     | 1E-04       | NA    |
| Valentin Paniagua-PER       | PER     | 2000-11-23 | 2001-07-28 | 8            | NA         | NA          | NA    |
| Alejandro Toledo-PER        | PER     | 2001-07-28 | 2006-07-28 | 60           | -0.0328    | -5E-04      | NA    |
| Garcia Perez-PER            | PER     | 2006-07-28 | 2011-07-28 | 60           | -0.2155    | -0.0036     | NA    |
| Ollanta Humala-PER          | PER     | 2011-07-28 | 2015-12-31 | 53           | -0.1282    | -0.0024     | Right |
| Aquino-PHL                  | PHL     | 1986-02-25 | 1992-06-30 | 30           | 0.1929     | 0.0064      | Left  |
| Ramos-PHL                   | PHL     | 1992-06-30 | 1998-06-30 | 72           | -0.2181    | -0.003      | NA    |
| Estrada-PHL                 | PHL     | 1998-06-30 | 2001-01-20 | 31           | -0.0492    | -0.0016     | NA    |
| Gloria Macapagal-Arroyo-PHL | PHL     | 2001-01-21 | 2010-06-30 | 113          | 0.2664     | 0.0024      | NA    |
| Benigno Aquino III-PHL      | PHL     | 2010-06-30 | 2015-12-31 | 66           | 0.0619     | 9E-04       | Right |
| Namaliu-PNG                 | PNG     | 1988-07-04 | 1992-07-17 | 31           | NA         | NA          | Left  |
| Wingti-PNG                  | PNG     | 1992-07-17 | 1994-08-30 | 25           | NA         | NA          | NA    |
| Chan-PNG                    | PNG     | 1994-08-30 | 1997-07-22 | 35           | NA         | NA          | NA    |
| Skate-PNG                   | PNG     | 1997-07-22 | 1999-07-14 | 24           | NA         | NA          | NA    |
| Morauta-PNG                 | PNG     | 1999-07-14 | 2002-08-05 | 37           | NA         | NA          | NA    |
| Somare-PNG                  | PNG     | 2002-08-06 | 2011-08-02 | 108          | 0.2727     | 0.0025      | NA    |
| O'Neil-PNG                  | PNG     | 2011-08-02 | 2015-12-31 | 52           | -0.3277    | -0.0063     | Right |
| Jaruzelski-POL              | POL     | 1981-10-18 | 1990-12-22 | 12           | NA         | NA          | Left  |
| Walesa-POL                  | POL     | 1990-12-22 | 1995-12-23 | 60           | NA         | NA          | NA    |
| Kwasniewski-POL             | POL     | 1995-12-23 | 2005-12-23 | 120          | 0.007      | 1E-04       | NA    |
| Kaczynski-POL               | POL     | 2005-12-23 | 2010-04-10 | 52           | 0.1864     | 0.0036      | NA    |
| Komorowski-POL              | POL     | 2010-04-10 | 2010-07-08 | 3            | NA         | NA          | NA    |
| Schetyna-POL                | POL     | 2010-07-08 | 2010-08-06 | 1            | NA         | NA          | NA    |
| Komorowski-POL              | POL     | 2010-08-06 | 2015-08-06 | 60           | -0.2722    | -0.0045     | NA    |
| Soares-PRT                  | PRT     | 1986-03-09 | 1996-03-09 | 75           | 0.1398     | 0.0019      | Left  |
| Sampaio-PRT                 | PRT     | 1996-03-09 | 2006-03-09 | 120          | -0.0785    | -7E-04      | NA    |
| Cavaco Silva-PRT            | PRT     | 2006-03-09 | 2015-12-31 | 117          | -0.1007    | -9E-04      | Right |
| Rodriguez Pedotti-PRY       | PRY     | 1989-02-03 | 1993-08-15 | 44           | 0.1208     | 0.0027      | Left  |
| Wasmosy Monti-PRY           | PRY     | 1993-08-15 | 1998-08-15 | 60           | -0.0581    | -0.001      | NA    |
| Cubas Grau-PRY              | PRY     | 1998-08-15 | 1999-03-28 | 7            | NA         | NA          | NA    |



| Leader ID                        | Country | From       | To         | Spell Length | Change Tax | Rate Change | Cens  |
|----------------------------------|---------|------------|------------|--------------|------------|-------------|-------|
| Gonzalez Macchi-PRY              | PRY     | 1999-03-28 | 2003-08-15 | 53           | 0.0823     | 0.0016      | NA    |
| Nicanor Duarte Frutos-PRY        | PRY     | 2003-08-15 | 2008-08-15 | 60           | 0.1456     | 0.0024      | NA    |
| Fernando Lugo-PRY                | PRY     | 2008-08-15 | 2012-06-22 | 46           | -0.1577    | -0.0034     | NA    |
| Federico Franco-PRY              | PRY     | 2012-06-22 | 2013-08-15 | 14           | 0.0567     | 0.0041      | NA    |
| Horacio Cartes-PRY               | PRY     | 2013-08-15 | 2015-12-31 | 28           | -0.0119    | -4E-04      | Right |
| Khalifah Ath-Thani-QAT           | QAT     | 1972-02-22 | 1995-06-27 | 66           | 0.011      | 2E-04       | Left  |
| Hamad ibn Khalifah Al Thani-QAT  | QAT     | 1995-06-27 | 2013-06-25 | 216          | -0.569     | -0.0026     | NA    |
| Tamim ibn Hamad Al Thani-QAT     | QAT     | 2013-06-26 | 2015-12-31 | 30           | 0.4021     | 0.0134      | Right |
| Roman-ROM                        | ROM     | 1989-12-26 | 1991-10-01 | 22           | NA         | NA          | NA    |
| Stolojan-ROM                     | ROM     | 1991-10-01 | 1992-11-04 | 13           | NA         | NA          | NA    |
| Vacariou-ROM                     | ROM     | 1992-11-04 | 1996-12-12 | 49           | NA         | NA          | NA    |
| Ciorbea-ROM                      | ROM     | 1996-12-12 | 1998-03-30 | 15           | -0.1618    | -0.0108     | NA    |
| Dejeu-ROM                        | ROM     | 1998-03-30 | 1998-04-15 | 1            | NA         | NA          | NA    |
| Vasile-ROM                       | ROM     | 1998-04-15 | 1999-12-14 | 20           | -0.0717    | -0.0036     | NA    |
| Isarescu-ROM                     | ROM     | 1999-12-22 | 2000-12-28 | 12           | -0.0889    | -0.0074     | NA    |
| A. Nastase-ROM                   | ROM     | 2000-12-28 | 2004-12-21 | 48           | 0.316      | 0.0066      | NA    |
| Traian Basescu-ROM               | ROM     | 2004-12-29 | 2007-04-20 | 28           | 0.0678     | 0.0024      | NA    |
| Vacariou-ROM                     | ROM     | 2007-04-20 | 2007-05-23 | 1            | NA         | NA          | NA    |
| Traian Basescu-ROM               | ROM     | 2007-05-23 | 2012-07-10 | 62           | -0.0531    | -9E-04      | NA    |
| Crin Antonescu-ROM               | ROM     | 2012-07-10 | 2012-08-28 | 1            | NA         | NA          | NA    |
| Traian Basescu-ROM               | ROM     | 2012-08-28 | 2014-12-21 | 28           | 0.123      | 0.0044      | NA    |
| Gorbachev-RUS                    | RUS     | 1985-03-11 | 1991-08-21 | 20           | NA         | NA          | Left  |
| Yeltsin-RUS                      | RUS     | 1991-08-21 | 1999-12-31 | 100          | -0.145     | -0.0015     | NA    |
| Putin-RUS                        | RUS     | 2000-01-01 | 2015-12-31 | 192          | 0.1498     | 8E-04       | Right |
| Habyarimana-RWA                  | RWA     | 1973-07-05 | 1994-04-06 | 52           | NA         | NA          | Left  |
| Sindikubwabo-RWA                 | RWA     | 1994-04-06 | 1994-07-19 | 3            | NA         | NA          | NA    |
| Paul Kagame-RWA                  | RWA     | 1994-07-19 | 2015-12-31 | 257          | 0.0218     | 1E-04       | Right |
| Fahd-SAU                         | SAU     | 1982-06-13 | 1996-01-01 | 73           | 0.0601     | 8E-04       | Left  |
| Abdullah ibn Abdilaziz-SAU       | SAU     | 1996-01-01 | 2015-01-23 | 228          | -0.4416    | -0.0019     | NA    |
| Salman bin Abdulaziz Al Saud-SAU | SAU     | 2015-01-23 | 2015-12-31 | 11           | NA         | NA          | Right |
| Al-Bashir-SDN                    | SDN     | 1989-06-30 | 2015-12-31 | 312          | -0.2071    | -7E-04      | Both  |
| Diouf-SEN                        | SEN     | 1981-01-01 | 2000-04-01 | 124          | -1.2368    | -0.01       | Left  |
| Abdoulaye Wade-SEN               | SEN     | 2000-04-02 | 2012-04-02 | 144          | 0.461      | 0.0032      | NA    |
| Sall-SEN                         | SEN     | 2012-04-02 | 2015-12-31 | 44           | 0.04       | 9E-04       | Right |
| Lee Kuan Yew-SGP                 | SGP     | 1959-06-05 | 1990-11-28 | 11           | NA         | NA          | Left  |
| Goh Chok Tong-SGP                | SGP     | 1990-11-28 | 2004-08-12 | 165          | -0.1711    | -0.001      | NA    |
| Lee Hsien Loong-SGP              | SGP     | 2004-08-12 | 2015-12-31 | 136          | 0.3275     | 0.0024      | Right |
| Momoh-SLE                        | SLE     | 1985-11-28 | 1992-04-29 | 28           | NA         | NA          | Left  |
| Strasser-SLE                     | SLE     | 1992-05-01 | 1996-01-17 | 45           | -0.1049    | -0.0023     | NA    |
| Bio-SLE                          | SLE     | 1996-01-17 | 1996-03-29 | 2            | NA         | NA          | NA    |
| Kabbah-SLE                       | SLE     | 1996-03-29 | 1997-05-25 | 14           | 0.3254     | 0.0232      | NA    |
| Koroma-SLE                       | SLE     | 1997-05-25 | 1998-02-12 | 9            | NA         | NA          | NA    |
| Kabbah-SLE                       | SLE     | 1998-03-10 | 2007-09-17 | 115          | -0.2177    | -0.0019     | NA    |
| Bai Koroma-SLE                   | SLE     | 2007-09-17 | 2015-12-31 | 99           | -0.0217    | -2E-04      | Right |
| Cristiani-SLV                    | SLV     | 1989-06-01 | 1994-06-01 | 54           | NA         | NA          | Left  |
| Calderon Sol-SLV                 | SLV     | 1994-06-01 | 1999-06-01 | 60           | NA         | NA          | NA    |
| Flores-SLV                       | SLV     | 1999-06-01 | 2004-06-01 | 60           | 0.0014     | 0           | NA    |
| Saca Gonzalez-SLV                | SLV     | 2004-06-01 | 2009-06-01 | 60           | -2E-04     | 0           | NA    |
| Funes-SLV                        | SLV     | 2009-06-01 | 2014-06-01 | 60           | -0.0062    | -1E-04      | NA    |



| Leader ID                 | Country | From       | To         | Spell Length | Change Tax | Rate Change | Cens  |
|---------------------------|---------|------------|------------|--------------|------------|-------------|-------|
| Sanchez Ceren-SLV         | SLV     | 2014-06-01 | 2015-12-31 | 18           | 0.0129     | 7E-04       | Right |
| Siad Barre-SOM            | SOM     | 1969-10-21 | 1991-01-26 | 13           | NA         | NA          | Left  |
| Hassan Sheikh Mohamud-SOM | SOM     | 2012-09-16 | 2015-12-31 | 40           | NA         | NA          | Right |
| Kostunica-SRB             | SRB     | 2006-06-04 | 2008-07-07 | 26           | 0.4729     | 0.0182      | NA    |
| Cvetkovic-SRB             | SRB     | 2008-07-07 | 2012-07-27 | 48           | -0.2695    | -0.0056     | NA    |
| Dacic-SRB                 | SRB     | 2012-07-27 | 2014-04-27 | 21           | 0.0328     | 0.0016      | NA    |
| Vucic-SRB                 | SRB     | 2014-04-27 | 2015-12-31 | 20           | -0.2491    | -0.0125     | Right |
| Shankar-SUR               | SUR     | 1988-01-25 | 1990-12-24 | 12           | -0.1785    | -0.0149     | Left  |
| Kraag-SUR                 | SUR     | 1990-12-29 | 1991-09-16 | 9            | NA         | NA          | NA    |
| Venetiaan-SUR             | SUR     | 1991-09-16 | 1996-09-15 | 60           | 0.6177     | 0.0103      | NA    |
| Wijdenbosch-SUR           | SUR     | 1996-09-15 | 2000-08-12 | 47           | -0.0238    | -5E-04      | NA    |
| Venetiaan-SUR             | SUR     | 2000-08-12 | 2010-08-12 | 120          | 0.4117     | 0.0034      | NA    |
| Bouterse-SUR              | SUR     | 2010-08-12 | 2015-12-31 | 64           | 0.268      | 0.0042      | Right |
| Meciar-SVK                | SVK     | 1993-01-01 | 1994-03-16 | 15           | NA         | NA          | NA    |
| Moravcik-SVK              | SVK     | 1994-03-16 | 1994-12-13 | 9            | NA         | NA          | NA    |
| Meciar-SVK                | SVK     | 1994-12-13 | 1998-10-30 | 46           | NA         | NA          | NA    |
| Dzurinda-SVK              | SVK     | 1998-10-30 | 2006-07-04 | 93           | -0.0212    | -2E-04      | NA    |
| Fico-SVK                  | SVK     | 2006-07-04 | 2012-07-08 | 48           | 0.0904     | 0.0019      | NA    |
| Radicova-SVK              | SVK     | 2010-07-08 | 2012-04-04 | 21           | -0.018     | -9E-04      | NA    |
| Fico-SVK                  | SVK     | 2012-04-04 | 2015-12-31 | 44           | -0.2145    | -0.0049     | Right |
| Kucan-SVN                 | SVN     | 1990-04-22 | 1991-12-23 | 21           | NA         | NA          | NA    |
| Peterle-SVN               | SVN     | 1991-12-23 | 1992-05-14 | 5            | NA         | NA          | NA    |
| Drnovsek-SVN              | SVN     | 1992-05-14 | 2000-05-03 | 96           | 0          | 0           | NA    |
| Bajuk-SVN                 | SVN     | 2000-05-03 | 2000-11-17 | 6            | NA         | NA          | NA    |
| Drnovsek-SVN              | SVN     | 2000-11-17 | 2002-12-11 | 25           | 0.0331     | 0.0013      | NA    |
| Anton Rop-SVN             | SVN     | 2002-12-11 | 2004-11-09 | 23           | 0.1401     | 0.0061      | NA    |
| Janez Jansa-SVN           | SVN     | 2004-11-09 | 2008-11-21 | 48           | 0.0299     | 6E-04       | NA    |
| Borut Pahor-SVN           | SVN     | 2008-11-21 | 2012-02-10 | 39           | 0.1331     | 0.0034      | NA    |
| Janez Jansa-SVN           | SVN     | 2012-02-10 | 2013-03-20 | 13           | 0.1464     | 0.0113      | NA    |
| Bratusek-SVN              | SVN     | 2013-03-20 | 2014-09-18 | 18           | 0.003      | 2E-04       | NA    |
| Cerar-SVN                 | SVN     | 2014-09-18 | 2015-12-31 | 15           | -0.1724    | -0.0115     | Right |
| Carlsson-SWE              | SWE     | 1986-03-12 | 1991-10-30 | 22           | NA         | NA          | Left  |
| Bildt-SWE                 | SWE     | 1991-10-30 | 1994-10-07 | 36           | NA         | NA          | NA    |
| Carlsson-SWE              | SWE     | 1994-10-07 | 1996-03-21 | 17           | 0.1401     | 0.0082      | NA    |
| Persson-SWE               | SWE     | 1996-03-21 | 2006-10-06 | 127          | -0.2402    | -0.0019     | NA    |
| Reinfeldt-SWE             | SWE     | 2006-10-06 | 2014-10-03 | 96           | 0.1371     | 0.0014      | NA    |
| Stefan Löfven-SWE         | SWE     | 2014-10-03 | 2015-12-31 | 14           | 0.0166     | 0.0012      | Right |
| Mswati-SWZ                | SWZ     | 1986-04-25 | 2015-12-31 | 312          | 0.2566     | 8E-04       | Both  |
| Al-Assad H.-SYR           | SYR     | 1971-02-22 | 2000-06-10 | 126          | NA         | NA          | Left  |
| Bashar al-Assad-SYR       | SYR     | 2000-06-11 | 2015-12-31 | 186          | -0.0206    | -1E-04      | Right |
| Habre-TCD                 | TCD     | 1982-06-19 | 1990-12-02 | 12           | NA         | NA          | Left  |
| Deby-TCD                  | TCD     | 1990-12-04 | 2015-12-31 | 300          | -0.4712    | -0.0016     | Right |
| Eyadema-TGO               | TGO     | 1967-04-14 | 2005-02-05 | 182          | 0.2106     | 0.0012      | Left  |
| Bonfoh-TGO                | TGO     | 2005-02-25 | 2005-05-04 | 3            | NA         | NA          | NA    |
| Faure Gnassingbe-TGO      | TGO     | 2005-05-04 | 2015-12-31 | 127          | 0.186      | 0.0015      | Right |
| Choonhavan-THA            | THA     | 1988-08-04 | 1991-02-23 | 14           | NA         | NA          | Left  |
| Panyarachun-THA           | THA     | 1991-03-07 | 1992-04-04 | 14           | -0.0135    | -0.001      | NA    |
| Kraprayoon-THA            | THA     | 1992-04-05 | 1992-05-24 | 1            | NA         | NA          | NA    |
| Panyarachun-THA           | THA     | 1992-06-10 | 1992-09-23 | 4            | NA         | NA          | NA    |

| Leader ID                   | Country | From       | To         | Spell Length | Change Tax | Rate Change | Cens  |
|-----------------------------|---------|------------|------------|--------------|------------|-------------|-------|
| Leekpai-THA                 | THA     | 1992-09-23 | 1995-07-13 | 34           | -0.0415    | -0.0012     | NA    |
| Silpa-Archa-THA             | THA     | 1995-07-13 | 1996-12-01 | 17           | -0.0247    | -0.0015     | NA    |
| Chavalit Yongchaiyudh-THA   | THA     | 1996-12-01 | 1997-11-09 | 11           | NA         | NA          | NA    |
| Leekpai-THA                 | THA     | 1997-11-09 | 2001-02-09 | 39           | -0.0048    | -1E-04      | NA    |
| Thaksin Shinawatra-THA      | THA     | 2001-02-10 | 2006-09-19 | 67           | 0.0504     | 8E-04       | NA    |
| Chulanont-THA               | THA     | 2006-09-19 | 2008-01-29 | 16           | 0.0649     | 0.0041      | NA    |
| Sundaravej-THA              | THA     | 2008-01-29 | 2008-09-09 | 8            | NA         | NA          | NA    |
| Wongsawat-THA               | THA     | 2008-09-09 | 2008-12-02 | 3            | NA         | NA          | NA    |
| Vejjajiva-THA               | THA     | 2008-12-15 | 2011-08-08 | 32           | 0.1328     | 0.0042      | NA    |
| Yingluck Shinawatra-THA     | THA     | 2011-08-08 | 2014-05-07 | 33           | 0.1828     | 0.0055      | NA    |
| Prayuth Chan-ocha-THA       | THA     | 2014-05-22 | 2015-12-31 | 19           | -0.2072    | -0.0109     | Right |
| Kadreddin Aslonov-TJK       | TJK     | 1991-08-31 | 1991-09-23 | 2            | NA         | NA          | NA    |
| Nabiyev-TJK                 | TJK     | 1991-09-23 | 1992-09-07 | 12           | NA         | NA          | NA    |
| Iskandrov-TJK               | TJK     | 1992-09-07 | 1992-11-20 | 2            | NA         | NA          | NA    |
| Rakhmonov-TJK               | TJK     | 1992-11-20 | 2015-12-31 | 277          | 0.1426     | 5E-04       | Right |
| Gusmao-TLS                  | TLS     | NA         | NA         | 61           | NA         | NA          | NA    |
| Ramos-Horta-TLS             | TLS     | NA         | NA         | 9            | NA         | NA          | NA    |
| Fernando de Ara<fa>jo-TLS   | TLS     | NA         | NA         | 2            | NA         | NA          | NA    |
| Ramos-Horta-TLS             | TLS     | NA         | NA         | 49           | NA         | NA          | NA    |
| Ruak-TLS                    | TLS     | NA         | NA         | 43           | NA         | NA          | Right |
| Robinson-TTO                | TTO     | 1986-12-18 | 1991-12-07 | 24           | -0.0508    | -0.0021     | Left  |
| Manning-TTO                 | TTO     | 1991-12-16 | 1995-11-09 | 47           | -0.133     | -0.0028     | NA    |
| Panday-TTO                  | TTO     | 1995-11-09 | 2001-12-24 | 73           | -0.0798    | -0.0011     | NA    |
| Manning-TTO                 | TTO     | 2001-12-25 | 2010-05-26 | 101          | -0.4368    | -0.0043     | NA    |
| Kamla Persad-Bissessar-TTO  | TTO     | 2010-05-26 | 2015-09-09 | 64           | 0.0324     | 5E-04       | NA    |
| Keith Rowley-TTO            | TTO     | 2015-09-09 | 2015-12-31 | 3            | NA         | NA          | Right |
| Zine Al-Abidine Ben Ali-TUN | TUN     | 1987-11-07 | 2011-01-14 | 253          | -0.2837    | -0.0011     | Left  |
| Mebazaa-TUN                 | TUN     | 2011-01-15 | 2011-12-13 | 11           | NA         | NA          | NA    |
| Marzouki-TUN                | TUN     | 2011-12-13 | 2014-12-31 | 36           | 0.2258     | 0.0063      | NA    |
| Caid Essebsi-TUN            | TUN     | 2014-12-31 | 2015-12-31 | 12           | -0.0568    | -0.0047     | Right |
| Akbulut-TUR                 | TUR     | 1989-11-09 | 1991-06-24 | 18           | NA         | NA          | Left  |
| Yilmaz-TUR                  | TUR     | 1991-06-24 | 1991-11-20 | 5            | NA         | NA          | NA    |
| Demirel-TUR                 | TUR     | 1991-11-20 | 1993-05-16 | 18           | NA         | NA          | NA    |
| Erdal Inonu-TUR             | TUR     | 1993-05-16 | 1993-06-25 | 1            | NA         | NA          | NA    |
| Ciller-TUR                  | TUR     | 1993-06-25 | 1996-03-06 | 33           | 0.1048     | 0.0032      | NA    |
| Yilmaz-TUR                  | TUR     | 1996-03-06 | 1996-06-28 | 3            | NA         | NA          | NA    |
| Erbakan-TUR                 | TUR     | 1996-06-28 | 1997-06-30 | 12           | -0.105     | -0.0087     | NA    |
| Yilmaz-TUR                  | TUR     | 1997-06-30 | 1999-01-11 | 19           | -0.0906    | -0.0048     | NA    |
| Ecevit-TUR                  | TUR     | 1999-01-11 | 2002-11-18 | 46           | 0.1609     | 0.0035      | NA    |
| Abdullah Gul-TUR            | TUR     | 2002-11-19 | 2003-03-14 | 4            | NA         | NA          | NA    |
| Erdogan-TUR                 | TUR     | 2003-03-14 | 2015-12-31 | 153          | -0.0241    | -2E-04      | Right |
| Lee Teng-Hui-TWN            | TWN     | 1988-01-13 | 2000-05-20 | 125          | -0.3546    | -0.0028     | Left  |
| Chen Shui-bian-TWN          | TWN     | 2000-05-21 | 2008-05-20 | 96           | -0.114     | -0.0012     | NA    |
| Ma Ying-jeou-TWN            | TWN     | 2008-05-20 | 2015-12-31 | 91           | 0.0704     | 8E-04       | Right |
| Mwinyi-TZA                  | TZA     | 1985-11-05 | 1995-11-05 | 71           | NA         | NA          | Left  |
| Mkapa-TZA                   | TZA     | 1995-11-05 | 2005-12-21 | 121          | -0.0119    | -1E-04      | NA    |
| Kikwete-TZA                 | TZA     | 2005-12-21 | 2015-11-05 | 119          | 0.1812     | 0.0015      | NA    |
| John Magufuli-TZA           | TZA     | 2015-11-05 | 2015-12-31 | 1            | NA         | NA          | Right |
| Museveni-UGA                | UGA     | 1986-01-29 | 2015-12-31 | 312          | -0.2353    | -8E-04      | Both  |

| Leader ID                  | Country | From       | To         | Spell Length | Change Tax | Rate Change | Cens  |
|----------------------------|---------|------------|------------|--------------|------------|-------------|-------|
| Kravchuk-UKR               | UKR     | 1990-07-18 | 1994-07-19 | 49           | NA         | NA          | NA    |
| Kuchma-UKR                 | UKR     | 1994-07-19 | 2005-01-23 | 126          | 0.0588     | 5E-04       | NA    |
| Yushchenko-UKR             | UKR     | 2005-01-23 | 2010-02-25 | 61           | 0.1995     | 0.0033      | NA    |
| Yanukovych-UKR             | UKR     | 2010-02-25 | 2014-02-22 | 48           | 0.1429     | 0.003       | NA    |
| Oleksandr Turchynov-UKR    | UKR     | 2014-02-23 | 2014-06-07 | 4            | NA         | NA          | NA    |
| Petro Poroshenko-UKR       | UKR     | 2014-06-07 | 2015-12-31 | 18           | -0.0758    | -0.0042     | Right |
| Sanguinetti-URY            | URY     | 1985-03-01 | 1990-03-01 | 3            | NA         | NA          | Left  |
| Lacalle de Herrera-URY     | URY     | 1990-03-01 | 1995-03-01 | 60           | 0.2472     | 0.0041      | NA    |
| Sanguinetti-URY            | URY     | 1995-03-01 | 2000-03-01 | 60           | -0.0472    | -8E-04      | NA    |
| Jorge Batlle-URY           | URY     | 2000-03-02 | 2005-03-01 | 60           | -0.1338    | -0.0022     | NA    |
| Tabare Vazquez-URY         | URY     | 2005-03-01 | 2010-03-01 | 60           | 0.0794     | 0.0013      | NA    |
| Jose Mujica-URY            | URY     | 2010-03-01 | 2015-03-01 | 60           | 0.2554     | 0.0043      | NA    |
| Tabare Vasquez-URY         | URY     | 2015-03-01 | 2015-12-31 | 9            | NA         | NA          | Right |
| G.H.W. Bush-USA            | USA     | 1989-01-20 | 1993-01-20 | 37           | 0.0862     | 0.0023      | Left  |
| Clinton-USA                | USA     | 1993-01-20 | 2001-01-20 | 96           | 0.0066     | 1E-04       | NA    |
| G.W. Bush-USA              | USA     | 2001-01-21 | 2009-01-20 | 96           | 0.0422     | 4E-04       | NA    |
| Obama-USA                  | USA     | 2009-01-20 | 2015-12-31 | 83           | 0.0423     | 5E-04       | Right |
| Karimov-UZB                | UZB     | 1990-03-24 | 2015-12-31 | 310          | -0.1199    | -4E-04      | Right |
| Andres Perez-VEN           | VEN     | 1989-02-02 | 1993-08-31 | 44           | 0.0323     | 7E-04       | Left  |
| Velasquez-VEN              | VEN     | 1993-08-31 | 1994-02-02 | 6            | NA         | NA          | NA    |
| Caldera Rodriguez-VEN      | VEN     | 1994-02-02 | 1999-02-02 | 60           | 0.2453     | 0.0041      | NA    |
| Hugo Chavez-VEN            | VEN     | 1999-02-02 | 2012-03-05 | 157          | -0.806     | -0.0051     | NA    |
| Maduro-VEN                 | VEN     | 2012-03-05 | 2015-12-31 | 45           | 0.3913     | 0.0087      | Right |
| Nguyen Van Linh-VNM        | VNM     | 1986-12-18 | 1991-06-27 | 18           | NA         | NA          | Left  |
| Do Muoi-VNM                | VNM     | 1991-06-27 | 1997-12-29 | 78           | 0.0576     | 7E-04       | NA    |
| Phieu-VNM                  | VNM     | 1997-12-29 | 2001-04-22 | 40           | -0.1007    | -0.0025     | NA    |
| Nong Duc Manh-VNM          | VNM     | 2001-04-23 | 2011-01-19 | 117          | 0.1012     | 9E-04       | NA    |
| Phu Trong-VNM              | VNM     | 2011-01-19 | 2015-12-31 | 59           | 0.2987     | 0.0051      | Right |
| Saleh al-Hashidi-YEM       | YEM     | 1978-07-17 | 2012-02-27 | 266          | 0.0186     | 1E-04       | Left  |
| Abd Rabbuh Mansur Hadi-YEM | YEM     | 2012-02-27 | 2015-12-31 | 46           | 2.8141     | 0.0612      | Right |
| deKlerk-ZAF                | ZAF     | 1989-08-15 | 1994-05-10 | 53           | 0.0763     | 0.0014      | Left  |
| Mandela-ZAF                | ZAF     | 1994-05-10 | 1999-06-16 | 61           | -0.1944    | -0.0032     | NA    |
| Mbeki-ZAF                  | ZAF     | 1999-06-16 | 2008-09-25 | 111          | 0.1297     | 0.0012      | NA    |
| Motlanthe-ZAF              | ZAF     | 2008-09-25 | 2009-05-09 | 8            | NA         | NA          | NA    |
| Zuma-ZAF                   | ZAF     | 2009-05-09 | 2015-12-31 | 79           | -0.0067    | -1E-04      | Right |
| Kaunda-ZMB                 | ZMB     | 1964-10-24 | 1991-11-02 | 23           | NA         | NA          | Left  |
| Chiluba-ZMB                | ZMB     | 1991-11-02 | 2002-01-02 | 122          | -0.134     | -0.0011     | NA    |
| Levy Mwanawasa-ZMB         | ZMB     | 2002-01-03 | 2008-06-29 | 77           | -0.0817    | -0.0011     | NA    |
| Banda-ZMB                  | ZMB     | 2008-06-29 | 2011-09-23 | 39           | 0.2998     | 0.0077      | NA    |
| Sata-ZMB                   | ZMB     | 2011-09-23 | 2014-10-28 | 37           | 0.2008     | 0.0054      | NA    |
| Scott-ZMB                  | ZMB     | 2014-10-29 | 2015-01-25 | 3            | NA         | NA          | NA    |
| Edgar Lungu-ZMB            | ZMB     | 2015-01-25 | 2015-12-31 | 11           | NA         | NA          | Right |
| Mugabe-ZWE                 | ZWE     | 1980-03-04 | 2015-12-31 | 312          | 0.2729     | 9E-04       | Both  |

| Rank | Country | Name                   | Leader's ID | Tenure Months | Change in Tax | $\Delta$ in Tax |
|------|---------|------------------------|-------------|---------------|---------------|-----------------|
| 1    | YEM     | Abd Rabbuh Mansur Hadi | YEM-2012    | 43            | 2.81          | 0.07            |
| 2    | COD     | Laurent Kabila         | DRC-1997    | 27            | 0.98          | 0.04            |
| 3    | GNB     | Vieira                 | GNB-2005    | 10            | 0.29          | 0.03            |
| 4    | SLE     | Kabbah                 | SIE-1996-2  | 12            | 0.33          | 0.03            |
| 5    | GRC     | Georgios Papandreou    | GRC-2009    | 25            | 0.63          | 0.03            |
| 6    | EGY     | al-Sisi                | EGY-2014    | 15            | 0.35          | 0.02            |
| 7    | IRN     | Rouhani                | IRN-2013    | 27            | 0.52          | 0.02            |
| 8    | LBY     | Akila Saleh Issa       | LIB-2014    | 13            | 0.24          | 0.02            |
| 9    | SRB     | Kostunica              | SER-2006    | 26            | 0.47          | 0.02            |
| 10   | FRA     | Mitterand              | FRN-1981    | 17            | 0.29          | 0.02            |

90 **C.2. Leaders with the Largest Increases per Month.**

| Rank | Country | Name             | Leader's ID | Tenure Months | Change in Tax | $\Delta$ in Tax |
|------|---------|------------------|-------------|---------------|---------------|-----------------|
| 1    | NIC     | Violeta Chamorro | NIC-1990    | 74            | -5.08         | -0.07           |
| 2    | ROM     | Ciorbea          | RUM-1996    | 3             | -0.16         | -0.05           |
| 3    | COD     | Joseph Kabila    | DRC-2001    | 177           | -4.63         | -0.03           |
| 4    | BGD     | Ershad           | BNG-1982    | 9             | -0.20         | -0.02           |
| 5    | JPN     | Taro Aso         | JPN-2008    | 12            | -0.26         | -0.02           |
| 6    | MWI     | Peter Mutharika  | MAW-2014    | 15            | -0.32         | -0.02           |
| 7    | ITA     | Renzi            | ITA-2014    | 19            | -0.37         | -0.02           |
| 8    | JPN     | Hashimoto        | JPN-1996    | 30            | -0.53         | -0.02           |
| 9    | ALB     | Rama             | ALB-2013    | 17            | -0.29         | -0.02           |
| 10   | SRB     | Vucic            | SER-2014    | 15            | -0.25         | -0.02           |

91 **C.3. Leaders with the Largest Decreases per Month.**

| <i>Variable</i>                      | <i>Description</i>                                                                                                                                                               | <i>Source</i> |
|--------------------------------------|----------------------------------------------------------------------------------------------------------------------------------------------------------------------------------|---------------|
| <b>Net Gasoline Tax</b>              | Net tax estimated using the "gap" approach, which is the difference between the local price and the benchmark                                                                    | (1)           |
| <b>GDP Per Capita PPP</b>            | Gross domestic product per capita based on purchasing power parity                                                                                                               | (2)           |
| <b>GDP Growth</b>                    | Gross domestic product per capita annual growth in percent                                                                                                                       | (2)           |
| <b>Central Gov Debt</b>              | Total stock of debt liabilities issued by a country's central government as a percent of gross national product                                                                  | (3)           |
| <b>Oil and Gas Income Dependence</b> | Total oil and gas income as percentage of GDP                                                                                                                                    | (4), (2)      |
| <b>VAT</b>                           | Value-added Tax Rate                                                                                                                                                             | (5)           |
| <b>Democracy</b>                     | Dichotomous measure of democracy based on Robert Dahl's elements of contestation and participation                                                                               | (6)           |
| <b>Non-Democracy</b>                 | Dichotomous measure of autocracy based on Robert Dahl's elements of contestation and participation                                                                               | (6)           |
| <b>Parliamentary System</b>          | Binary variable that takes the value of 1 when the chief executive is elected by the assembly / parliament, according to the DPI Dataset                                         | (7, p.3)      |
| <b>Presidential System</b>           | Binary variable that takes the value of 1 when the chief executive is elected in a separate election from the assembly / parliament, according to the DPI Dataset                | (7, p.3)      |
| <b>Oil Importing Country</b>         | Binary variable that takes the value of 1 when the value of oil and gas exports per capita is lower than XXX USD                                                                 | (8)           |
| <b>Oil Exporting Country</b>         | Binary variable that takes the value of 1 when the value of oil and gas exports per capita is higher than XXX USD                                                                | (8)           |
| <b>Persistent Subsidizer</b>         | Binary variable that takes the value of 1 when the median net implicit tax is below 0 for the 1990-2015 period                                                                   | (1)           |
| <b>Persistent Taxer</b>              | Binary variable that takes the value of 1 when the country has a fixed-price system, but is not a persistent subsidizer                                                          | (1)           |
| <b>Leader's Age</b>                  | Leader's age in years                                                                                                                                                            | (9)           |
| <b>Leader's Gender</b>               | Leader's gender as defined in Archigos                                                                                                                                           | (9)           |
| <b>Leader's Schooling</b>            | Binary variable that takes the value of 1 when the leader attended college and 0 otherwise, as defined by the Cursus Honorum dataset                                             | (10)          |
| <b>Executive Political Ideology</b>  | Political orientation of the party in power in terms of their economic policy agenda, as defined in the DPI dataset. This variable has three categories: Left, Right, and Center | (7)           |
| <b>Economic Crisis Year</b>          | Binary variable that takes the value of 1 when the country experienced an economic crisis according to any of the four criteria defined by the IMF                               | () IMF, 2020  |

92 **D. Data Sources.**

93 **References**

- 94 1. ML Ross, C Hazlett, P Mahdavi, Global progress and backsliding on gasoline taxes and subsidies. *Nat. Energy* **2**, 16201  
95 (2017).
- 96 2. The World Bank, World Development Indicators (2019) <http://wdi.worldbank.org> (accessed June 1, 2019).
- 97 3. International Monetary Fund, Government finance statistics (2019) <http://data.imf.org> (accessed June 1, 2019).
- 98 4. ML Ross, *The oil curse: How petroleum wealth shapes the development of nations*. (Princeton University Press), (2013).
- 99 5. International Monetary Fund, Value-added tax rates (2019) IMF Tax Policy Division.
- 100 6. C Boix, M Miller, S Rosato, A complete data set of political regimes, 1800–2007. *Comp. Polit. Stud.* **46**, 1523–1554 (2013).
- 101 7. C Scartascini, C Cruz, P Keefer, The database of political institutions 2017 (dpi2017). *Washington, Banco Interamericano*  
102 *de Desarrollo* (2018).
- 103 8. M Ross, P Mahdavi, Oil and gas data, 1932-2014. *Harv. Dataverse* **2** (2015).
- 104 9. HE Goemans, KS Gleditsch, G Chiozza, Introducing archigos: A dataset of political leaders. *J. Peace research* **46**, 269–283  
105 (2009).
- 106 10. A Baturo, Cursus honorum: Personal background, careers and experience of political leaders in democracy and dictator-  
107 ship—new data and analyses. *Polit. Gov.* **4**, 138–157 (2016).
